# Supplementary material for: A school-based, multi-faceted health promotion programme to prevent obesity among children: protocol of a cluster-randomised controlled trial (the DECIDE-Children study)
Source: PubMed Central journal article supplement — BMJ Open. 2019 Nov 2;9(11):e027902. doi: 10.1136/bmjopen-2018-027902 (PMC6830599; doi:10.1136/bmjopen-2018-027902), 2019-11-02
Supplement: bmjopen-2018-027902.draft_revisions.pdf [file bmjopen-2018-027902.draft_revisions.pdf]

# BMJ Open

BMJ Open is committed to open peer review. As part of this commitment we make the peer review history of every article we publish publicly available.

When an article is published we post the peer reviewers' comments and the authors' responses online. We also post the versions of the paper that were used during peer review. These are the versions that the peer review comments apply to.

The versions of the paper that follow are the versions that were submitted during the peer review process. They are not the versions of record or the final published versions. They should not be cited or distributed as the published version of this manuscript.

BMJ Open is an open access journal and the full, final, typeset and author-corrected version of record of the manuscript is available on our site with no access controls, subscription charges or pay-per-view fees (<http://bmjopen.bmj.com>).

If you have any questions on BMJ Open's open peer review process please email [info.bmjopen@bmj.com](mailto:info.bmjopen@bmj.com)

# BMJ Open

## A school-based, smartphone application-assisted, multi-component childhood obesity intervention: protocol of a cluster-randomized controlled trial (the DECIDE-children study)

|                               |                                                                                                                                                                                                                                                                                                                                                                                                                                                                                                                                                                                                                                  |
|-------------------------------|----------------------------------------------------------------------------------------------------------------------------------------------------------------------------------------------------------------------------------------------------------------------------------------------------------------------------------------------------------------------------------------------------------------------------------------------------------------------------------------------------------------------------------------------------------------------------------------------------------------------------------|
| Journal:                      | <i>BMJ Open</i>                                                                                                                                                                                                                                                                                                                                                                                                                                                                                                                                                                                                                  |
| Manuscript ID                 | bmjopen-2018-027902                                                                                                                                                                                                                                                                                                                                                                                                                                                                                                                                                                                                              |
| Article Type:                 | Protocol                                                                                                                                                                                                                                                                                                                                                                                                                                                                                                                                                                                                                         |
| Date Submitted by the Author: | 13-Nov-2018                                                                                                                                                                                                                                                                                                                                                                                                                                                                                                                                                                                                                      |
| Complete List of Authors:     | Liu, Zheng; Peking University, Department of Maternal and Child Health, School of Public Health<br>Wu, Yangfeng; Peking University School of Public Health, Epidemiology<br>Niu, Wen-Yi<br>Feng, Xiangxian; Changzhi Medical College,<br>Lin, Yi<br>Gao, Aiyu<br>Zhang, Fang<br>Fang, Hai; Peking University, China Center for Health Development Studies<br>GAO, Pei; Peking University Health Science Center, Department of Epidemiology and Biostatistics<br>Li, Hui-Juan; Peking University Clinical Research Institute<br>Wang, Haijun; School of Public Health, Peking University, Department of Maternal and Child Health |
| Keywords:                     | pediatric obesity, cluster, prevention, randomized controlled trial, smartphone                                                                                                                                                                                                                                                                                                                                                                                                                                                                                                                                                  |
|                               |                                                                                                                                                                                                                                                                                                                                                                                                                                                                                                                                                                                                                                  |

SCHOLARONE™  
Manuscripts

1  
2  
3  
4 **A school-based, smartphone application-assisted, multi-component**  
5  
6 **childhood obesity intervention: protocol of a cluster-randomized**  
7  
8 **controlled trial (the DECIDE-children study)**  
9  
10

11  
12  
13  
14 Zheng Liu<sup>1</sup>, Yang-Feng Wu<sup>2</sup>, Wen-Yi Niu<sup>3</sup>, Xiang-Xian Feng<sup>4</sup>, Yi Lin<sup>5</sup>, Ai-Yu Gao<sup>6</sup>,  
15  
16 Fang Zhang<sup>7</sup>, Hai Fang<sup>8</sup>, Pei Gao<sup>9</sup>, Hui-Juan Li<sup>2</sup>, Hai-Jun Wang<sup>1</sup>, the study team for  
17  
18 the DECIDE-children study  
19  
20

21  
22 1 Department of Maternal and Child Health, School of Public Health, Peking University,  
23  
24 Beijing, China; 2 Peking University Clinical Research Institute, Beijing, China; 3  
25  
26 Department of Social Medicine and Health Education, School of Public Health, Peking  
27  
28 University, Beijing, China; 4 Changzhi Medical College, Shanxi, China; 5 Urumqi  
29  
30 Primary and Secondary School Health Care Center, Xinjiang, China; 6 Dongcheng  
31  
32 Primary and Secondary School Health Care Center, Beijing, China; 7 Mentougou  
33  
34 Primary and Secondary School Health Care Center, Beijing, China; 8 China Center for  
35  
36 Health Development Studies, Peking University, Beijing, China; 9 Department of  
37  
38 Epidemiology and Biostatistics, School of Public Health, Peking University, Beijing,  
39  
40 China  
41  
42  
43  
44  
45  
46  
47  
48  
49  
50

51 Corresponding author:

52  
53 Professor Hai-Jun Wang, Department of Maternal and Child Health, School of Public  
54  
55 Health, Peking University. No. 38 Xueyuan Road, Haidian District, 100191 Beijing,  
56  
57 China. Email: whjun@pku.edu.cn  
58  
59  
60

## Abstract

**Introduction** Pediatric obesity has been an increasingly serious public health concern in China. There is an urgent need to develop an effective, feasible and scalable intervention to prevent this rising trend.

**Methods and analysis** DECIDE-Children is a cluster-randomized controlled trial (cluster-RCT) that aims to assess the effectiveness of a school-based, smartphone application-assisted, multi-component intervention to prevent obesity among the 4<sup>th</sup> grade primary school students. Twenty-four schools (approximately 1200 students) from eastern (Beijing), middle (Changzhi) and western (Urumchi) regions in China were randomized to the one-academic-year multi-component intervention group (intervention, n=12) or the usual care group (control, n=12). The intervention will be delivered through the schools, consisting of student-, parent- and school-elements as well as a smartphone application helping to promote the professional-teacher-parent interaction. The primary outcome is the change of students' body mass index (BMI) and BMI-Z score at the end of the one-academic-year intervention. Data of other anthropometric indicators (waist and hip circumferences, blood pressure, body fat percentage), physical fitness indicators, mediators and/or moderators of intervention effects including students' knowledge-attitude-practice, family and school environment related to obesity prevention are also collected. Study participants will be followed up to collect the data of those indicators at 4 months, 9 months and 21 months following baseline investigation.

**Ethics and dissemination** This study was granted ethical approval by Peking

1  
2  
3  
4 University Health Science Center. Results will be disseminated through publication in  
5  
6 peer-reviewed journals, presentation at conferences and in lay summaries provided to  
7  
8 school staff and participants.  
9

10  
11 **Trial registration** ClinicalTrials.gov: NCT03665857.  
12  
13  
14  
15  
16  
17  
18  
19  
20  
21  
22  
23  
24  
25  
26  
27  
28  
29  
30  
31  
32  
33  
34  
35  
36  
37  
38  
39  
40  
41  
42  
43  
44  
45  
46  
47  
48  
49  
50  
51  
52  
53  
54  
55  
56  
57  
58  
59  
60

For peer review only

### **Strengths and limitations of this study**

1. Smartphone application employed to promote the professional-teacher-parent interaction and collaboration.
2. Involvement of three centers located in eastern, middle and western part of China with diversely geographical characteristics.
3. A theory-driven and systematic development during its formative phase.
4. A follow-up investigation conducted to determine the sustainability of the intervention.
5. This study is limited by a relatively short duration.

## Introduction

Trends of obesity epidemic are rapidly increasing in China and worldwide [1, 2]. Based on data from the Chinese National Survey on Students Constitution and Health from 1985 to 2014, the prevalence of overweight and obesity among 7-18 y Chinese children increased continuously, reaching 19.4% in 2014, with the annual increasing rate of obesity during 2010-2014 greater than any other periods from 1985 to 2010 [2].

Recent studies showed that childhood obesity not only has adverse consequences on physical and mental health of children in the short term [3, 4], but also increases cardiovascular mortality in adulthood [5, 6]. Attempts to curb the epidemic are urgently needed.

Among obesity interventions worldwide, those conducted in the school settings have been assessed as “holding promise”. More than 80% of the school-based RCTs reported statistically significant and favorable effects for at least one adiposity-related outcomes [7]. These findings support recommendations that the school be a focal point of obesity prevention effects.

Childhood obesity, in most cases, results from unhealthy diets and physical inactivity. Recent meta-analyses of behavior change interventions supports that goal-setting and self-monitoring, coupled with other behavior change strategies, promote physical activity, healthy eating as well as weight loss [8, 9]. However, traditional behavior change techniques (e.g., using diary to recording food and activity) can be too time-consuming to maintain. Interventions that utilize mobile health technologies have been shown potential for success [10]. With an increasing number of smartphone users in

1  
2  
3  
4 China, there is promise for mobile technology-assisted childhood obesity prevention  
5  
6 programs. Smartphone application (app) has been particularly promising due to its  
7  
8 individualized and interactive characteristics, which might be greatly helpful in timely  
9  
10 monitoring and feedback of children's nutritional status, diet and physical activity  
11  
12 behaviors.  
13  
14  
15

16  
17 In September 2018, we started to conduct the cluster-RCT that aims to develop an  
18  
19 innovative, effective and scalable programme to prevent childhood obesity among  
20  
21 primary school students.  
22  
23  
24  
25  
26  
27  
28  
29  
30  
31  
32  
33  
34  
35  
36  
37  
38  
39  
40  
41  
42  
43  
44  
45  
46  
47  
48  
49  
50  
51  
52  
53  
54  
55  
56  
57  
58  
59  
60



## Methods and analysis

This protocol has been prepared in accordance with the Standard Protocol Items: Recommendations for Interventional Trials (SPIRIT) statement [11, 12].

### *Study design*

The study is embedded in “Diet, ExerCise and carDiovascular hHealth” (DECIDE) project. The primary purpose of the DECIDE project was to design a comprehensive intervention package for preventing cerebrovascular-related diseases (e.g., obesity) for Chinese population. Our DECIDE-children study was designed specifically for the children population. The study will be lasting until June 2020. Figure 1 shows the study flow. A total of 24 primary schools (clusters) were selected, 8 of which were from each of three regions in China, respectively: Beijing (eastern region), Changzhi in Shanxi Province (middle region) and Urumchi in Xinjiang Province (western region).

Following baseline investigation, schools were randomly assigned with 1:1 ratio to either the multi-component intervention or usual-care control group. The duration of intervention is one academic year (approximately 9 months). This study was approved by the Ethics Committee of Peking University Health Science Center (IRB00001052-18021).

### *Recruitment*

#### **Recruitment of schools**

In primary schools in China, there are six grades in total, with age ranging from 6 to 11 years. The present study will be carried out in the grade 4 students (approximately 9 years old), for they can better understand health education knowledge and remain in

1  
2  
3  
4 their schools at follow-up visits.  
5

6 The inclusion criteria included that the school principal agreed to take part in the study,  
7  
8 and the number of students recruited from grade 4 was no less than 50. If schools were  
9  
10 located at different administrative districts, the number of schools in each  
11  
12 administrative district should be even. Boarding schools, schools for children with  
13  
14 special skills or minor ethnic groups were excluded. Schools that had conducted or  
15  
16 would conduct other programme to prevent or treat childhood obesity during the study  
17  
18 period were excluded. Schools were also not included if they had a definite plan for  
19  
20 relocation or cancellation in the next two years.  
21  
22  
23  
24  
25

26  
27 One or two classes of grade 4 were recruited. If the number of eligible students in each  
28  
29 class was predicted to be no less than 40, one class was selected; otherwise, two classes  
30  
31 were recruited.  
32  
33

### 34 35 **Recruitment of students** 36

37 After recruiting schools, the research staff asked the class teachers to send informed  
38  
39 consent forms to all students and their parents in the selected classes. All students and  
40  
41 their parents who provided written informed consent participated in this study. But  
42  
43 students with one of the following conditions were excluded: ① medical history of  
44  
45 heart disease, hypertension, diabetes, tuberculosis, asthma, hepatitis or nephritis; or ②  
46  
47 obesity caused by endocrine diseases or side effects of drugs; or ③ abnormal physical  
48  
49 development like dwarfism or gigantism; or ④ being physically incomplete and  
50  
51 deformed such as severe scoliosis, chicken breasts, limp, obvious O-leg or X-leg; or ⑤  
52  
53 inability to participate in school sports activities; or ⑥ having been losing weight by  
54  
55  
56  
57  
58  
59  
60

1  
2  
3  
4 vomiting or taking drugs during the past three months.  
5  
6  
7  
8

9 ***Baseline and follow-up data collection***  
10

11 The primary outcomes are the differences between the intervention and control group  
12 in the change of students' BMI and BMI-Z score after one academic year (9 months  
13 after baseline). The secondary outcomes include the differences between two groups in  
14 the changes of 1) students' BMI and BMI-Z score at 4 and 21 months after baseline, 2)  
15 students' waist and hip circumferences at 4, 9 and 21 months after baseline, 3) students'  
16 systolic and diastolic blood pressures at 4, 9 and 21 months after baseline, 4) students'  
17 body fat percentage at 9 months after baseline, 5) students' physical fitness measures  
18 (one-minute rope jumping, one-minute sit-up, standing jump and 50m\*8 shuttle run) at  
19 9 months after baseline, and 6) mediators and/or moderators of intervention effects  
20 including students' knowledge-attitude-practice, family and school environment related  
21 to obesity prevention at 9 months after baseline.  
22  
23  
24  
25  
26  
27  
28  
29  
30  
31  
32  
33  
34  
35  
36  
37  
38  
39

40 According to the standard procedure, baseline data were collected by the trained project  
41 personnel or physical education teachers (only for physical fitness measures). Follow-  
42 up investigations will be undertaken according to the same standard procedures at 4  
43 months after baseline (i.e. in the middle of intervention for the intervention group), 9-  
44 month (i.e. immediately after intervention for the intervention group) and 21 months  
45 after baseline (i.e. 12 months after 9-month intervention for the intervention group).  
46  
47  
48  
49  
50  
51  
52  
53  
54  
55

56 The assessors measuring students' height and weight at follow-up investigations will  
57 be blind for group allocation, i.e. they will not be told which schools were allocated to  
58  
59  
60

1  
2  
3  
4 the intervention or control group. Descriptions of the outcome measures are shown in  
5  
6 Table 1.  
7

8  
9 Questionnaires were developed based on previous studies, pilot study of the project and  
10  
11 found to be feasible and acceptable to students and parents [13-15]. Questions related  
12  
13 to dietary intake were designed based on the validated Block Kids Food Screener [13],  
14  
15 and those related to duration of moderate-to-vigorous physical activity were based on  
16  
17 a validated 7-day physical activity questionnaire [14]. Other possible variables  
18  
19 moderating or mediating students' nutritional status (e.g. children's eating behaviors  
20  
21 [15]) were also included in the questionnaires.  
22  
23  
24  
25

### 26 27 ***Randomization procedures*** 28

29  
30 Randomization was stratified by administrative districts that the schools belong to. For  
31  
32 practical reasons, four schools were selected from each of the two districts (Dongcheng  
33  
34 and Mentougou District) of Beijing, respectively; four schools were recruited from each  
35  
36 of the two districts (Shayiba and Shuimogou District) of Urumchi, respectively; all of  
37  
38 eight schools were selected from urban Changzhi (only one administrative district).  
39  
40 Randomization was carried out using a computer-generated random number system by  
41  
42 a researcher in the third-party organization who was not involved in the study.  
43  
44  
45  
46  
47

### 48 49 ***Intervention description*** 50

51  
52 Twelve schools in the intervention group will be implemented the multi-component  
53  
54 intervention. Schools in the control group will carry on their usual care. After the study  
55  
56 is completed, participants in the control group will receive health education materials  
57  
58 delivered to the intervention group.  
59  
60

## **Theoretical framework of the intervention**

Childhood obesity is a complex public health problem. Social Ecological Model, which captures the influencing factors of a specific health behavior at multiple levels, provides a framework that may be helpful for obesity prevention [16]. Based on the theoretical framework, the DECIDE-children study will be implemented at student-, family- and school-levels, which are likely to influence knowledge, attitude and behaviors of school children. Intervention components delivered at these levels are shown in Figure 2.

To strengthen collaboration between research staff, schools and families, a smartphone app (“Eat Wisely Move Happily”) was designed to assist the implementation of this intervention. For instance, health education knowledge and monitoring data will be regularly input into computer management system of the app by research staff. Class teachers and primary caregivers can not only receive health education knowledge such as “Eat and Move Reasonably, a Healthy Weight”, they will also be provided an assessment and feedback about children’s nutritional status and behaviors related to obesity prevention/management by the app.

## **Description of the intervention components**

Details of the intervention components are described in Table 2, including 1) school policies related to obesity prevention, 2) the smartphone app, 3) monthly monitoring of students’ weight and height, 4) reinforcement of students’ physical activity within and outside school as well as 5) health education activities towards students, parents (or other primary caregivers) and teachers.

## **Quality control of the intervention**

1  
2  
3  
4 Before implementation of the intervention, all of the participating school personnel  
5  
6 have been trained by the project personnel. Two manuals (“An Implementation Manual  
7  
8 for School Personnel Involving in the Multi-component Obesity Intervention among  
9  
10 Primary School Students” and “An Implementation Manual for Project Personnel  
11  
12 Involving in the Multi-component Obesity Intervention among Primary School  
13  
14 Students”) have been developed for this complex intervention. They describe in details  
15  
16 the duty of both project personnel and school personnel in intervention schools  
17  
18 delivering the intervention (school principals, class teachers, physical education  
19  
20 teachers, school doctors), respectively. The manuals also describe the detailed  
21  
22 workflow of implementation for each intervention component, i.e., who, when, how  
23  
24 and to what extent the specific intervention element should be delivered. All of the  
25  
26 school personnel have been required to carry out the intervention in accordance with  
27  
28 the implementation manual.  
29  
30  
31  
32  
33  
34  
35  
36

37 During implementation of the intervention, regular field observation and checking of  
38  
39 smartphone app records will aid in strengthening quality of the intervention.  
40  
41  
42

### 43 ***Process evaluation***

44  
45 The process evaluation will be conducted in intervention schools throughout the project  
46  
47 period to monitor and document the level of implementation of the intervention. It also  
48  
49 aimed to aid in understanding the relationship between specific intervention elements  
50  
51 and outcomes. Based on the steps and principles described in the conceptual framework  
52  
53 by Saunders et al.[17], we identified the process evaluation elements including fidelity  
54  
55 (the extent to which the intervention will be implemented as initially planned), dose  
56  
57  
58  
59  
60

1  
2  
3  
4 delivered (the frequency and intensity of actual implementation of the program), dose  
5  
6 received (the extent to which students/parents/teachers will be exposed to the  
7  
8 intervention, as well as the degree of their satisfaction with intervention and materials),  
9  
10 reach (the proportions and the characteristics of students/parents/teachers/schools  
11  
12 completing or dropping out from the intervention) and context (family environment and  
13  
14 school policies related to obesity prevention).  
15  
16  
17

18  
19 The methods of process data collection will include: (1) direct regular field observation  
20  
21 and records collected to control quality of the intervention (e.g., quality and quantity of  
22  
23 the intervention sessions, number of students attending the lectures); (2) the users logs  
24  
25 (e.g., frequency and duration) collected by the smartphone app; and (3) student- and  
26  
27 parent-based questionnaires reporting the demographic information, family  
28  
29 environment as well as their satisfaction with the intervention; (4) school questionnaires  
30  
31 recording school policies related to obesity prevention.  
32  
33  
34  
35  
36

### 37 ***Health economic evaluation***

38  
39  
40 A cost-effectiveness analysis will be employed in the health economic evaluation, and  
41  
42 a societal perspective is used to examine whether the intervention is economically  
43  
44 feasible. Intervention costs include times (research staff, participating school staff, and  
45  
46 students' parents) for all the intervention activities and material expenses. Time costs  
47  
48 are based on personal employment compensations if available or average  
49  
50 compensations in the local areas for similar types of employees. Material expenses are  
51  
52 based on real purchasing prices. An incremental cost-effectiveness ratio will be  
53  
54 calculated and a sensitivity analysis will be used to vary key parameters to examine the  
55  
56  
57  
58  
59  
60

1  
2  
3  
4 robustness of health economic results.  
5

### 6 ***Sample size estimation*** 7

8  
9 We aim to recruit a total of 1,200 students from 24 schools with an average cluster size  
10  
11 of 50 students per school. This sample size will provide 88% power at 5% significance  
12  
13 level (two-sided) to detect a between-group difference of 0.50 kg/m<sup>2</sup> in BMI after the  
14  
15 one-school-year intervention, assuming a standard deviation (SD) of 1.40 kg/m<sup>2</sup>, an  
16  
17 intra-cluster correlation coefficient of 0.05 and the 10% rate of attrition.  
18  
19

### 20 ***Statistical analyses*** 21

22  
23 Statistical analyses will be performed using SAS version 9.4 (SAS Institute Inc., Cary,  
24  
25 NC, USA). All statistical tests will be two-sided at 5% level of significance. Baseline  
26  
27 characteristics at both school- and individual-level will be reported by using descriptive  
28  
29 statistics. Continuous variables will be presented as means and SDs, and categorical  
30  
31 variables will be presented as percentages.  
32  
33

34  
35 The primary analysis will be based on the intention-to-treat principle including all  
36  
37 randomized schools and students recruited from each school. Generalized linear mixed  
38  
39 models will be used to evaluate the intervention effect on primary and secondary  
40  
41 outcomes measured at 4 and/or 9 and/or 21 months following baseline investigation,  
42  
43 adjusting for baseline outcome value, age and sex. The cluster effect of school and  
44  
45 repeated measures of the same participant will be taken into account in the multi-level  
46  
47 modelling, and missing data will be treated in the maximum likelihood estimates  
48  
49 assuming they are missing at random. The intra-cluster correlation coefficient will also  
50  
51 be estimated. Sensitivity analysis will be considered on the primary outcome using the  
52  
53  
54  
55  
56  
57  
58  
59  
60



1  
2  
3  
4 last-value-carry-forward (LVCF) imputation on missing data. Model-adjusted mean  
5  
6 group differences will be reported on continuous outcomes. Adjusted odds ratio (OR)  
7  
8 will be reported on binary outcomes using a logit link. The 95% confidence interval  
9  
10 (CI) and associated *P*-value were calculated.  
11  
12  
13  
14  
15  
16  
17  
18  
19  
20  
21  
22  
23  
24  
25  
26  
27  
28  
29  
30  
31  
32  
33  
34  
35  
36  
37  
38  
39  
40  
41  
42  
43  
44  
45  
46  
47  
48  
49  
50  
51  
52  
53  
54  
55  
56  
57  
58  
59  
60

For peer review only

## Discussion

The DECIDE-children study is a school-based, smartphone app-assisted, multi-component cluster-RCT designed to prevent obesity among Chinese children with diversely geographical characteristics. Based on theory-driven and systematic development during its formative phase (e.g., systematic review [18], qualitative interviews, panel discussions and a pilot study [19]), this study aims to explore an effective, feasible and scalable intervention for preventing childhood obesity.

This study has several distinguishing features: 1) a smartphone app is employed to promote the professional-teacher-parent interaction and collaboration; 2) all the intervention components were developed and integrated into the regular academic schedule of each intervention school; 3) randomization by a researcher in the third-party organization, blinding of key outcome measures (the assessors measuring students' height and weight at follow-up investigations will be blind for group allocation), conducting a follow-up investigation at 21 months after baseline (i.e. 12 months after 9-month intervention for the intervention group) to determine the sustainability of the intervention, and a detailed process evaluation plan will help to provide study results with high quality.

### **Ethics and dissemination**

Any amendments to the study protocol were submitted for ethical approval prior to implementation. Written informed consent were obtained from all students and their parents who participated in this study via consent forms. Findings of this study will be disseminated via publications in peer-reviewed journals, conference presentations and lay summary reports which will be provided to school staff and participants.

For peer review only

## References

1. Ng M, Fleming T, Robinson M, et al. Global, regional, and national prevalence of overweight and obesity in children and adults during 1980-2013: a systematic analysis for the Global Burden of Disease Study 2013. *Lancet*, 2014, 384: 766-781.
2. Wang S, Dong YH, Wang ZH, et al. Trends in overweight and obesity among Chinese children of 7-18 years old during 1985-2014. *Zhonghua Yu Fang Yi Xue Za Zhi*, 2017, 51: 300-305.
3. Booth JN, Tomporowski PD, Boyle JM, et al. Obesity impairs academic attainment in adolescence: findings from ALSPAC, a UK cohort. *Int J Obes (Lond)*, 2014, 38: 1335-1342.
4. Pulgaron ER. Childhood obesity: a review of increased risk for physical and psychological comorbidities. *Clin Ther*, 2013, 35: A18-32.
5. Twig G, Yaniv G, Levine H, et al. Body-mass index in 2.3 million adolescents and cardiovascular death in adulthood. *N Engl J Med*, 2016, 374: 2430-2440.
6. Gunnell DJ, Frankel SJ, Nanchahal K, et al. Childhood obesity and adult cardiovascular mortality: a 57-year follow-up study based on the Boyd Orr cohort. *Am J Clin Nutr*, 1998, 136: 664-672.
7. Bleich SN, Vercammen KA, Zatz LY, et al. Interventions to prevent global childhood overweight and obesity: a systematic review. *Lancet Diabetes Endocrinol*, 2018, 6: 332-346.
8. Samdal GB, Eide GE, Barth T, et al. Effective behaviour change techniques for

- 1  
2  
3  
4 physical activity and healthy eating in overweight and obese adults; systematic  
5  
6 review and meta-regression analyses. *Int J Behav Nutr Phys Act*, 2017, 14: 42.  
7  
8  
9 9. Michie S, Abraham C, Whittington C, et al. Effective techniques in healthy  
10  
11 eating and physical activity interventions: a meta-regression. *Health Psychol*,  
12  
13 2009, 28: 690-701.  
14  
15  
16 10. Schippers M, Adam PC, Smolenski DJ, et al. A meta-analysis of overall effects  
17  
18 of weight loss interventions delivered via mobile phones and effect size  
19  
20 differences according to delivery mode, personal contact, and intervention  
21  
22 intensity and duration. *Obes Rev*, 2017, 18: 450-459.  
23  
24  
25 11. Chan AW, Tetzlaff JM, Altman DG, et al. SPIRIT 2013 statement: defining  
26  
27 standard protocol items for clinical trials. *Ann Intern Med*, 2013, 158: 200-207.  
28  
29  
30 12. Chan AW, Tetzlaff JM, Gotzsche PC, et al. SPIRIT 2013 explanation and  
31  
32 elaboration: guidance for protocols of clinical trials. *BMJ*, 2013, 346: e7586.  
33  
34  
35 13. Hunsberger M, O'Malley J, Block T, et al. Relative validation of Block Kids  
36  
37 Food Screener for dietary assessment in children and adolescents. *Matern Child*  
38  
39 *Nutr*, 2015, 11: 260-270.  
40  
41  
42 14. Liu AL, Ma GS, Zhang Q, et al. Reliability and validity of a 7-day physical  
43  
44 activity questionnaire for elementary students. [Article in Chinese]. *Zhonghua*  
45  
46 *Liu Xing Bing Xue Za Zhi*, 2003, 24: 901-904.  
47  
48  
49 15. Wardle J, Guthrie CA, Sanderson S, et al. Development of the Children's Eating  
50  
51 Behaviour Questionnaire. *J Child Psychol Psychiatry*, 2001, 42: 963-970.  
52  
53  
54 16. Sallis J, Owen N, Fisher E. *Ecological models of health behavior*, in *Health*  
55  
56  
57  
58  
59  
60

- 1  
2  
3  
4 *behavior and Health Education*, Glanz K, Rimer B, and Viswanath K, Editors.  
5  
6  
7 2008, Jossey-Bass, A Wiley Imprint: San Francisco, CA. p. 465-485.  
8
- 9 17. Saunders RP, Evans MH, and Joshi P. Developing a process-evaluation plan for  
10  
11 assessing health promotion program implementation: a how-to guide. *Health*  
12  
13 *promotion practice*, 2005, 6: 134-147.  
14
- 15  
16 18. Feng L, Wei D-M, Lin S-T, et al. Systematic review and meta-analysis of  
17  
18 school-based obesity interventions in mainland China. *PLoS One*, 2017, 12:  
19  
20 e0184704-e0184704.  
21  
22  
23  
24
- 25 19. Lin L, Li C, Gao A, et al. Effect of a comprehensive school-based intervention  
26  
27 on childhood obesity. *Chin J Sch Health*, 2018, 39: 1505-1508.  
28  
29
- 30 20. *Screening standard for malnutrition of school-age children and adolescents*.  
31  
32 2014: National Commission of Health and Family Planning of People's  
33  
34 Republic of China.  
35  
36
- 37 21. *Screening for overweight and obesity among school-age children and*  
38  
39 *adolescents*. 2018: National Commission of Health and Family Planning of the  
40  
41 People's Republic of China.  
42  
43  
44  
45  
46  
47  
48  
49  
50  
51  
52  
53  
54  
55  
56  
57  
58  
59  
60

**Authors' contributions**

HJW and YFW conceived the project. HJW, ZL, YFW, WYN and HJL were involved in design of the study and development of intervention materials. ZL wrote the first draft of the manuscript. XXF, YL, AYG and FZ contributed to implementation of the program. HF contributed to economic evaluation. PG contributed to statistical analysis plan. All authors approved the final manuscript.

For peer review only

## Acknowledgements

We thank Jun-Shi Chen, Li-Ming Wen, Jun Ma, Guan-Sheng Ma, Ke-Ji Li, Yan-Fang Wang, Zheng-Zhen Wang, Hong-Juan Li, Qian Zhang and Yao Zhao for their support and advice for the study design; the principals and teachers of all participating schools, and children and their families who are involved in the research; all members of the study team.

### Study team of the DECIDE-children study:

**Beijing:** Department of Maternal and Child Health, School of Public Health, Peking University (Hai-Jun Wang, Zheng Liu, Li-Zi Lin, Qiang Feng, Chen-Xiong Li, Shuang Zhou, Wen-Hao Li, Chu-Yao Jin, Qin Li, Yu Cheng, Di Wang, Lan Cheng, Yi Song, Hong Zhou, Xiang-Rong Xu, Jie-Yun Song); Dongcheng Primary and Secondary School Health Care Center, Beijing (Ai-Yu Gao, Hai-Hua Chen, Li-Jia Shang), Mentougou Primary and Secondary School Health Care Center, Beijing (Fang Zhang, Run-Ze Chen).

**Changzhi:** Changzhi Medical College (Xiang-Xian Feng, Jian-hui Yuan, Li-fen Duan).

**Urumqi:** Urumqi Primary and Secondary School Health Care Center, Xinjiang (Yi Lin, Chun-Xia Xu, Guo-Qin Yang, Zheng Zhang).

### Funding statement

This work was supported by National Key R&D Program of China (2016YFC1300204).

### Competing interests statement

None.



Table 1 Outcome measurements for the DECIDE-children

| Outcomes                                  | Time     |                            |                            |                             | Device                                                                                                                                        | Method                                            |
|-------------------------------------------|----------|----------------------------|----------------------------|-----------------------------|-----------------------------------------------------------------------------------------------------------------------------------------------|---------------------------------------------------|
|                                           | Baseline | 4 months<br>after baseline | 9 months<br>after baseline | 21 months<br>after baseline |                                                                                                                                               |                                                   |
| <b>Anthropometric measures</b>            |          |                            |                            |                             |                                                                                                                                               |                                                   |
| Height                                    | √        | √                          | √                          | √                           | Stadiometer<br>(Huateng GMCS-1)                                                                                                               | Measured to the nearest 0.1 cm for at least twice |
| Weight                                    | √        | √                          | √                          | √                           | Lever scale<br>(Wujin RGT-140)                                                                                                                | Measured to the nearest 0.1 kg for at least twice |
| Waist circumference                       | √        | √                          | √                          | √                           | Tape<br>(MyoTape)                                                                                                                             | Measured to the nearest 0.1 cm for at least twice |
| Hip circumference                         | √        | √                          | √                          | √                           | Tape<br>(MyoTape)                                                                                                                             | Measured to the nearest 0.1 cm for at least twice |
| Systolic and diastolic<br>blood pressures | √        | √                          | √                          | √                           | Electronic sphygmomanometer<br>(Omron HBP-1300)                                                                                               | Measured to the nearest 1 mmHg for at least twice |
| Body fat percentage                       | √        |                            | √                          |                             | Body component instrument<br>(Tanita MC-780MA)                                                                                                | According to the standard procedure               |
| <b>Physical fitness measures</b>          |          |                            |                            |                             |                                                                                                                                               |                                                   |
| One-minute rope<br>jumping                | √        |                            | √                          |                             | Physical fitness measures should be assessed by physical education teachers or trained project personnel according to the standard procedure. |                                                   |

1  
2  
3  
4  
5  
6  
7  
8  
9  
10  
11  
12  
13  
14  
15  
16  
17  
18  
19  
20  
21  
22  
23  
24  
25  
26  
27  
28  
29  
30  
31  
32  
33  
34  
35  
36  
37  
38  
39  
40  
41  
42  
43  
44  
45  
46

|                                      |   |   |                                                                                                                                                                 |
|--------------------------------------|---|---|-----------------------------------------------------------------------------------------------------------------------------------------------------------------|
| One-minute sit-up                    | √ | √ |                                                                                                                                                                 |
| Long standing jump                   | √ | √ |                                                                                                                                                                 |
| Shuttle run (50m*8)                  | √ | √ |                                                                                                                                                                 |
| <b>Behavioral and other measures</b> |   |   |                                                                                                                                                                 |
| Student questionnaire                | √ | √ | Students should finish the questionnaires in the classroom in the presence of the trained project personnel, who can provide guidance and help.                 |
| Parent questionnaire                 | √ | √ | The questionnaires should be self-reported by parents or other primary caregivers of students.                                                                  |
| School questionnaire                 | √ | √ | The questionnaires should be filled in by the trained investigators after face-to-face interviews with school leaders, doctors and physical education teachers. |

**Table 2 Description of the intervention components implemented in the DECIDE-children**

| <b>Intervention components</b>                 | <b>Frequency, duration, contents</b>                                                                                                                                                                                                                                                                                                                                                                                                                                                                                 | <b>Implementation agents</b>                                                                                                                 |
|------------------------------------------------|----------------------------------------------------------------------------------------------------------------------------------------------------------------------------------------------------------------------------------------------------------------------------------------------------------------------------------------------------------------------------------------------------------------------------------------------------------------------------------------------------------------------|----------------------------------------------------------------------------------------------------------------------------------------------|
| School policies related to obesity prevention  | <p>The following school policies are suggested:</p> <ol style="list-style-type: none"> <li><b>1. “Not selling”:</b><br/>Not selling unhealthy snack<sup>1</sup> or sugar-sweetened beverage within school;</li> <li><b>2. “Not eating”:</b><br/>Telling students not to eat unhealthy snack or drink sugar-sweetened beverage within school;</li> <li><b>3. “Not buying”:</b><br/>Students being educated by class teachers not to buy unhealthy snack or sugar-sweetened beverage around school.</li> </ol>         | Trained school principal;<br>Trained class teachers                                                                                          |
| The smartphone app (“Eat Wisely Move Happily”) | <ol style="list-style-type: none"> <li><b>1. Knowledge diffusion</b><br/>The smartphone app provides knowledge to parents (or other primary caregivers) of the students, class teachers and project personnel (professionals) in accordance with health education activities.</li> <li><b>2. Behavior monitoring</b><br/>Parents (or other primary caregivers) together with their children are asked to fill in a weekly report about diet and physical activity behaviors of students, and then receive</li> </ol> | The smartphone app (installed by parents, school teachers and research staff) and the computer management system (utilized by professionals) |

<sup>1</sup> “Healthy snacks” refer to dairy products, fresh vegetables or fruits and natural unprocessed nuts which are eaten out of three meals per day. “Unhealthy snacks” refer to snacks other than the three kinds of healthy snacks.

|                                                   |                                                                                                                                                                                                                                                                                                                                                                                                                                                                                                                                                                                                                                                                                                                                                                                                                                                 |                                                                                                                                                                                                                        |
|---------------------------------------------------|-------------------------------------------------------------------------------------------------------------------------------------------------------------------------------------------------------------------------------------------------------------------------------------------------------------------------------------------------------------------------------------------------------------------------------------------------------------------------------------------------------------------------------------------------------------------------------------------------------------------------------------------------------------------------------------------------------------------------------------------------------------------------------------------------------------------------------------------------|------------------------------------------------------------------------------------------------------------------------------------------------------------------------------------------------------------------------|
|                                                   | <p>individualized feedback related to these behaviors.</p> <p><b>3. Weight management</b></p> <p>According to monthly monitoring of students' weight and height (described below), parents (or other primary caregivers of the students), school teachers and professionals could view the recent nutritional status (categorized according to the BMI percentile criteria [20, 21]), changes compared with previous records of the students as well as the individualized feedback related to weight management.</p> <p><b>4. Assessment and feedback</b></p> <p>In addition to the independent feedback of behaviors and nutritional status mentioned above, the smartphone app also provides a synthetic and individualized "assessment and feedback". This assessment combines changes of behaviors and nutritional status of students.</p> |                                                                                                                                                                                                                        |
| Regular monitoring of students' weight and height | <p><b>1. Monthly monitoring</b></p> <p>Students' weight and height will be monitored monthly, the data is then timely input into the computer management system and thus being shown in the smartphone app (described above);</p> <p><b>2. Weekly monitoring</b></p> <p>Students' weight is monitored weekly by the students themselves in the classroom.</p>                                                                                                                                                                                                                                                                                                                                                                                                                                                                                   | <p>The trained school doctors with the help of the trained professionals (for monthly monitoring);</p> <p>The trained professionals (for data input of monthly monitoring)</p> <p>Students (for weekly monitoring)</p> |

|                                                                               |                                                                                                                                                                                                                                                                                                                                                                                                                                                                                                                                                                                                                                                                                                                                                                                                                                                                                                                                                                                                                                       |                                                                                                                                                                                                                        |
|-------------------------------------------------------------------------------|---------------------------------------------------------------------------------------------------------------------------------------------------------------------------------------------------------------------------------------------------------------------------------------------------------------------------------------------------------------------------------------------------------------------------------------------------------------------------------------------------------------------------------------------------------------------------------------------------------------------------------------------------------------------------------------------------------------------------------------------------------------------------------------------------------------------------------------------------------------------------------------------------------------------------------------------------------------------------------------------------------------------------------------|------------------------------------------------------------------------------------------------------------------------------------------------------------------------------------------------------------------------|
| <p>Reinforcement of students' physical activity within and outside school</p> | <p><b>1. Reinforcement of students' physical activity within school</b></p> <p>Students are organized by physical education teachers to do physical activity within school for at least one hour per school day (including physical education classes, class-break exercise, extracurricular activities), achieving moderate-to-vigorous intensity;</p> <p>Physical education teachers should teach students at least one sports game during each extracurricular activity.</p> <p><b>2. Reinforcement of students' physical activity outside school</b></p> <p>Parents (or other primary caregivers) will supervise and encourage students to do physical activity outside school, achieving 30 minutes per weekday and 1 hour per weekend day;</p> <p>Recommendations for physical activity outside school are given through the smartphone app once every two months;</p> <p>Students are encouraged to do sports games outside school that are taught by their physical education teachers during extracurricular activities.</p> | <p>The trained physical education teachers (for students' physical activity within school);</p> <p>Students' parents assisted by the smartphone app (for students' physical activity outside school)</p>               |
| <p>Health education activities</p>                                            | <p><b>1. Health education activities towards parents (or other primary caregivers)</b></p> <p><u>1) Frequency and duration</u></p> <p>At least one activity (lasting for about 40-60 minutes) is held in each semester. During the first semester, one more activity is required. Another activity is held in the second semester if necessary.</p> <p><u>2) Contents</u></p> <p>➤ For the first activity</p> <p>Key messages are similar to health education activities towards students (described below).</p> <p>Parents (or other primary caregivers) are also taught to use the smartphone app.</p> <p>➤ For other activities</p>                                                                                                                                                                                                                                                                                                                                                                                                | <p>The trained research staff (for health education activities towards parents/other primary caregivers and school teachers);</p> <p>The trained class teachers (for health education activities towards students)</p> |

1  
2  
3  
4  
5  
6  
7  
8  
9  
10  
11  
12  
13  
14  
15  
16  
17  
18  
19  
20  
21  
22  
23  
24  
25  
26  
27  
28  
29  
30  
31  
32  
33  
34  
35  
36  
37  
38  
39  
40  
41  
42  
43  
44  
45  
46

Project personnel will provide feedback about students' nutritional status and behaviors to parents. Face-to-face group discussions are needed between the project personnel and parents (or other primary caregivers).

## **2. Health education activities towards school teachers**

### 1) Frequency and duration

The activity is held once (lasting for about 40 minutes) at beginning of the intervention. School teachers participating in this program in each school (school principal, class teachers, school doctors and physical education teachers) are required to attend the activity.

### 2) Contents

Key messages are similar to health education activities towards students (described below). School teachers are also taught to use the smartphone app.

## **3. Health education activities towards students**

### 1) Frequency and duration

A total of ten activities (lasting for 40 minutes per activity) are provided once every two to three weeks (six activities arranged in the first semester and four in the second semester).

### 2) Forms

Seven health education lectures and three theme class meetings

### 3) Contents

#### ① Knowledge diffusion

Key messages include the benefits of healthy weight, measurement and assessment of weight, as well as skills to achieve a healthy weight (not eating excessively; not drinking sugar-sweetened beverage; eating less high-energy food; less sedentary behaviors; more physical activity). Health education books and "nutrition evaluation turnplate for Chinese

1  
2  
3  
4  
5  
6  
7  
8  
9  
10  
11  
12  
13  
14  
15  
16  
17  
18  
19  
20  
21  
22  
23  
24  
25  
26  
27  
28  
29  
30  
31  
32  
33  
34  
35  
36  
37  
38  
39  
40  
41  
42  
43  
44  
45  
46

|  |                                                                                                                                                                                                                                                                                                                                                                                                                                                                                                                                                                                                                       |  |
|--|-----------------------------------------------------------------------------------------------------------------------------------------------------------------------------------------------------------------------------------------------------------------------------------------------------------------------------------------------------------------------------------------------------------------------------------------------------------------------------------------------------------------------------------------------------------------------------------------------------------------------|--|
|  | <p>primary and middle school students” are delivered to students. Health education messages are also spread through posters in campus or classroom.</p> <p>② Promotion for translating knowledge into action</p> <p>“Small hand in big hand” homework (e.g., “challenge of three days away from screen”) is arranged in the end of each health education activity.</p> <p>③ Feedback and encouragement for BMI and behavior change</p> <p>Feedback of regular monitoring results of students’ BMI and behaviors is provided in each health education activity. The students with good performance are encouraged.</p> |  |
|--|-----------------------------------------------------------------------------------------------------------------------------------------------------------------------------------------------------------------------------------------------------------------------------------------------------------------------------------------------------------------------------------------------------------------------------------------------------------------------------------------------------------------------------------------------------------------------------------------------------------------------|--|

For peer review only

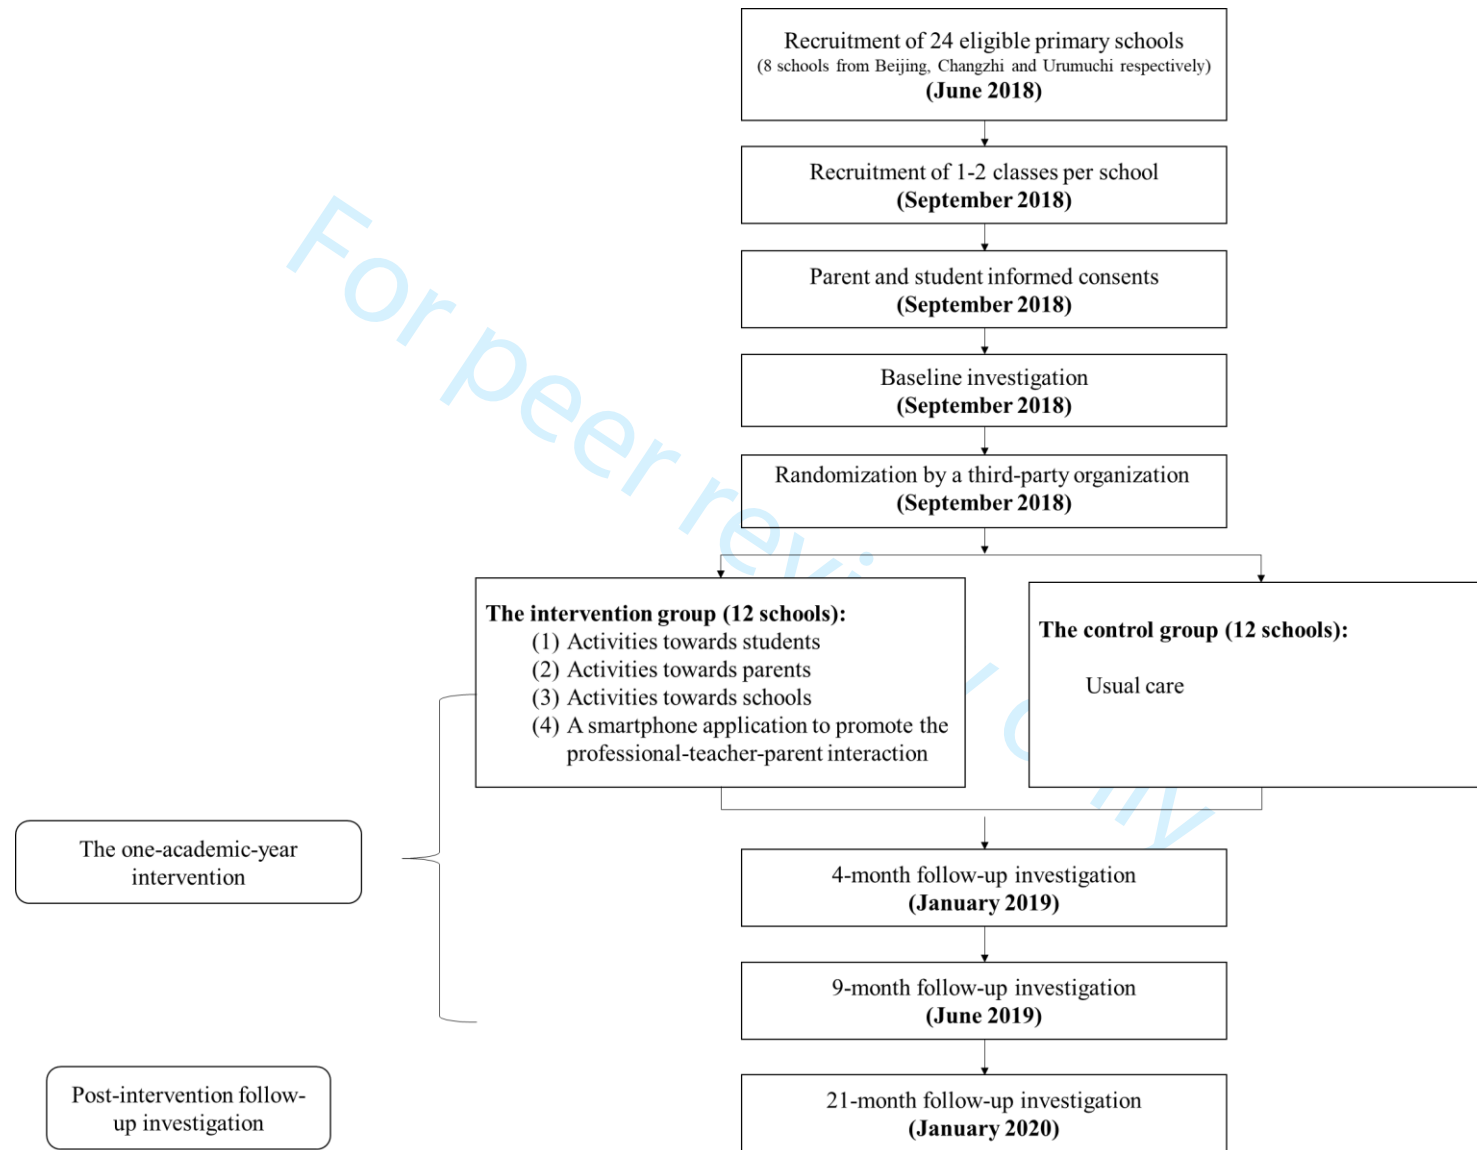



1  
2  
3  
4  
5  
6  
7  
8  
9  
10  
11  
12  
13  
14  
15  
16  
17  
18  
19  
20  
21  
22  
23  
24  
25  
26  
27  
28  
29  
30  
31  
32  
33  
34  
35  
36  
37  
38  
39  
40  
41  
42  
43  
44  
45  
46

**Figure 1 Study flow chart of the DECIDE-children**

For peer review only

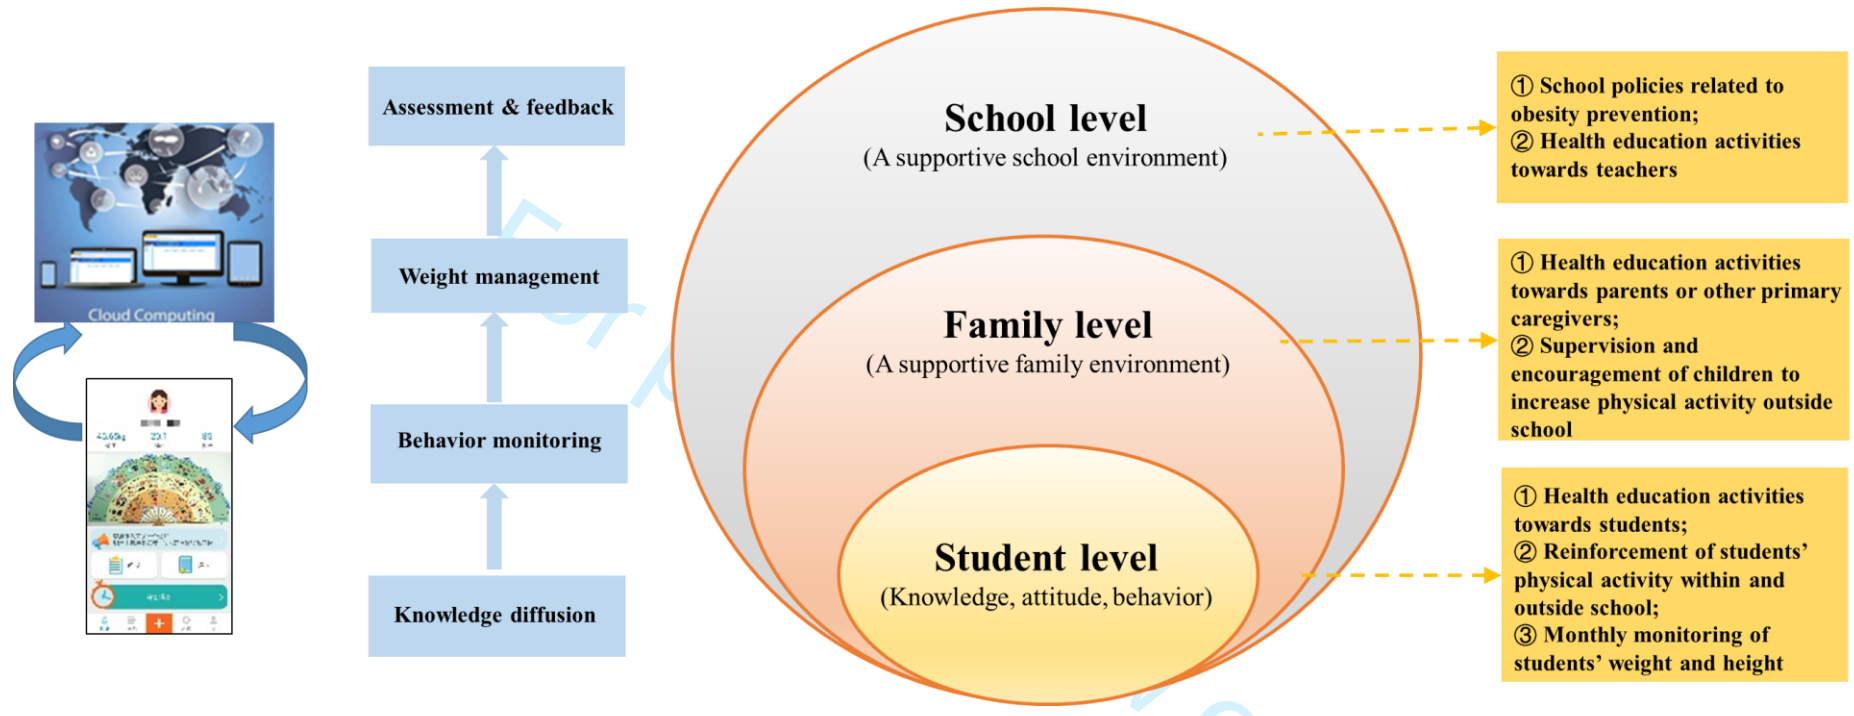

Figure 2 Theoretical framework of the DECIDE-children

# Reporting checklist for protocol of a clinical trial.

Based on the SPIRIT guidelines.

## Instructions to authors

Complete this checklist by entering the page numbers from your manuscript where readers will find each of the items listed below.

Your article may not currently address all the items on the checklist. Please modify your text to include the missing information. If you are certain that an item does not apply, please write "n/a" and provide a short explanation.

Upload your completed checklist as an extra file when you submit to a journal.

In your methods section, say that you used the SPIRIT reporting guidelines, and cite them as:

Chan A-W, Tetzlaff JM, Altman DG, Laupacis A, Gøtzsche PC, Krleža-Jerić K, Hróbjartsson A, Mann H, Dickersin K, Berlin J, Doré C, Parulekar W, Summerskill W, Groves T, Schulz K, Sox H, Rockhold FW, Rennie D, Moher D. SPIRIT 2013 Statement: Defining standard protocol items for clinical trials. *Ann Intern Med.* 2013;158(3):200-207

|                    |                     |                                                                                                              | Page   |
|--------------------|---------------------|--------------------------------------------------------------------------------------------------------------|--------|
|                    |                     | Reporting Item                                                                                               | Number |
| Title              | <a href="#">#1</a>  | Descriptive title identifying the study design, population, interventions, and, if applicable, trial acronym | 1      |
| Trial registration | <a href="#">#2a</a> | Trial identifier and registry name. If not yet registered, name of intended registry                         | 3      |

|    |                     |                     |                                                          |         |
|----|---------------------|---------------------|----------------------------------------------------------|---------|
| 1  | Trial registration: | <a href="#">#2b</a> | All items from the World Health Organization Trial       | n/a     |
| 2  |                     |                     |                                                          |         |
| 3  | data set            |                     | Registration Data Set                                    |         |
| 4  |                     |                     |                                                          |         |
| 5  |                     |                     |                                                          |         |
| 6  | Protocol version    | <a href="#">#3</a>  | Date and version identifier                              | n/a     |
| 7  |                     |                     |                                                          |         |
| 8  |                     |                     |                                                          |         |
| 9  | Funding             | <a href="#">#4</a>  | Sources and types of financial, material, and other      | 22      |
| 10 |                     |                     | support                                                  |         |
| 11 |                     |                     |                                                          |         |
| 12 |                     |                     |                                                          |         |
| 13 |                     |                     |                                                          |         |
| 14 |                     |                     |                                                          |         |
| 15 | Roles and           | <a href="#">#5a</a> | Names, affiliations, and roles of protocol contributors  | 1,21,22 |
| 16 |                     |                     |                                                          |         |
| 17 | responsibilities:   |                     |                                                          |         |
| 18 |                     |                     |                                                          |         |
| 19 | contributorship     |                     |                                                          |         |
| 20 |                     |                     |                                                          |         |
| 21 |                     |                     |                                                          |         |
| 22 |                     |                     |                                                          |         |
| 23 | Roles and           | <a href="#">#5b</a> | Name and contact information for the trial sponsor       | 22      |
| 24 |                     |                     |                                                          |         |
| 25 | responsibilities:   |                     |                                                          |         |
| 26 |                     |                     |                                                          |         |
| 27 | sponsor contact     |                     |                                                          |         |
| 28 |                     |                     |                                                          |         |
| 29 | information         |                     |                                                          |         |
| 30 |                     |                     |                                                          |         |
| 31 |                     |                     |                                                          |         |
| 32 | Roles and           | <a href="#">#5c</a> | Role of study sponsor and funders, if any, in study      | n/a     |
| 33 |                     |                     |                                                          |         |
| 34 | responsibilities:   |                     | design; collection, management, analysis, and            |         |
| 35 |                     |                     | interpretation of data; writing of the report; and the   |         |
| 36 | sponsor and funder  |                     | decision to submit the report for publication, including |         |
| 37 |                     |                     | whether they will have ultimate authority over any of    |         |
| 38 |                     |                     | these activities                                         |         |
| 39 |                     |                     |                                                          |         |
| 40 |                     |                     |                                                          |         |
| 41 |                     |                     |                                                          |         |
| 42 |                     |                     |                                                          |         |
| 43 |                     |                     |                                                          |         |
| 44 |                     |                     |                                                          |         |
| 45 |                     |                     |                                                          |         |
| 46 |                     |                     |                                                          |         |
| 47 | Roles and           | <a href="#">#5d</a> | Composition, roles, and responsibilities of the          | 22      |
| 48 |                     |                     |                                                          |         |
| 49 | responsibilities:   |                     | coordinating centre, steering committee, endpoint        |         |
| 50 |                     |                     | adjudication committee, data management team, and        |         |
| 51 | committees          |                     | other individuals or groups overseeing the trial, if     |         |
| 52 |                     |                     | applicable (see Item 21a for data monitoring committee)  |         |
| 53 |                     |                     |                                                          |         |
| 54 |                     |                     |                                                          |         |
| 55 |                     |                     |                                                          |         |
| 56 |                     |                     |                                                          |         |
| 57 |                     |                     |                                                          |         |
| 58 |                     |                     |                                                          |         |
| 59 |                     |                     |                                                          |         |
| 60 |                     |                     |                                                          |         |

|    |                      |                      |                                                              |        |
|----|----------------------|----------------------|--------------------------------------------------------------|--------|
| 1  | Background and       | <a href="#">#6a</a>  | Description of research question and justification for       | 5-6    |
| 2  |                      |                      |                                                              |        |
| 3  | rationale            |                      | undertaking the trial, including summary of relevant         |        |
| 4  |                      |                      |                                                              |        |
| 5  |                      |                      | studies (published and unpublished) examining benefits       |        |
| 6  |                      |                      |                                                              |        |
| 7  |                      |                      | and harms for each intervention                              |        |
| 8  |                      |                      |                                                              |        |
| 9  |                      |                      |                                                              |        |
| 10 |                      |                      |                                                              |        |
| 11 | Background and       | <a href="#">#6b</a>  | Explanation for choice of comparators                        | n/a    |
| 12 |                      |                      |                                                              |        |
| 13 | rationale: choice of |                      |                                                              |        |
| 14 |                      |                      |                                                              |        |
| 15 | comparators          |                      |                                                              |        |
| 16 |                      |                      |                                                              |        |
| 17 |                      |                      |                                                              |        |
| 18 | Objectives           | <a href="#">#7</a>   | Specific objectives or hypotheses                            | 6      |
| 19 |                      |                      |                                                              |        |
| 20 |                      |                      |                                                              |        |
| 21 |                      |                      |                                                              |        |
| 22 | Trial design         | <a href="#">#8</a>   | Description of trial design including type of trial (eg,     | 7      |
| 23 |                      |                      |                                                              |        |
| 24 |                      |                      | parallel group, crossover, factorial, single group),         |        |
| 25 |                      |                      |                                                              |        |
| 26 |                      |                      | allocation ratio, and framework (eg, superiority,            |        |
| 27 |                      |                      |                                                              |        |
| 28 |                      |                      | equivalence, non-inferiority, exploratory)                   |        |
| 29 |                      |                      |                                                              |        |
| 30 |                      |                      |                                                              |        |
| 31 |                      |                      |                                                              |        |
| 32 | Study setting        | <a href="#">#9</a>   | Description of study settings (eg, community clinic,         | 7      |
| 33 |                      |                      |                                                              |        |
| 34 |                      |                      | academic hospital) and list of countries where data will be  |        |
| 35 |                      |                      |                                                              |        |
| 36 |                      |                      | collected. Reference to where list of study sites can be     |        |
| 37 |                      |                      |                                                              |        |
| 38 |                      |                      | obtained                                                     |        |
| 39 |                      |                      |                                                              |        |
| 40 |                      |                      |                                                              |        |
| 41 |                      |                      |                                                              |        |
| 42 | Eligibility criteria | <a href="#">#10</a>  | Inclusion and exclusion criteria for participants. If        | 8-9    |
| 43 |                      |                      |                                                              |        |
| 44 |                      |                      | applicable, eligibility criteria for study centres and       |        |
| 45 |                      |                      |                                                              |        |
| 46 |                      |                      | individuals who will perform the interventions (eg,          |        |
| 47 |                      |                      |                                                              |        |
| 48 |                      |                      | surgeons, psychotherapists)                                  |        |
| 49 |                      |                      |                                                              |        |
| 50 |                      |                      |                                                              |        |
| 51 | Interventions:       | <a href="#">#11a</a> | Interventions for each group with sufficient detail to allow | 11-12, |
| 52 |                      |                      |                                                              |        |
| 53 | description          |                      | replication, including how and when they will be             | 25-29  |
| 54 |                      |                      |                                                              |        |
| 55 |                      |                      | administered                                                 |        |
| 56 |                      |                      |                                                              |        |
| 57 |                      |                      |                                                              |        |
| 58 |                      |                      |                                                              |        |
| 59 |                      |                      |                                                              |        |
| 60 |                      |                      |                                                              |        |

|    |                      |                      |                                                             |          |
|----|----------------------|----------------------|-------------------------------------------------------------|----------|
| 1  | Interventions:       | <a href="#">#11b</a> | Criteria for discontinuing or modifying allocated           | n/a      |
| 2  |                      |                      |                                                             |          |
| 3  | modifications        |                      | interventions for a given trial participant (eg, drug dose  |          |
| 4  |                      |                      | change in response to harms, participant request, or        |          |
| 5  |                      |                      | improving / worsening disease)                              |          |
| 6  |                      |                      |                                                             |          |
| 7  |                      |                      |                                                             |          |
| 8  |                      |                      |                                                             |          |
| 9  |                      |                      |                                                             |          |
| 10 |                      |                      |                                                             |          |
| 11 | Interventions:       | <a href="#">#11c</a> | Strategies to improve adherence to intervention protocols,  | 12-13    |
| 12 |                      |                      |                                                             |          |
| 13 | adherence            |                      | and any procedures for monitoring adherence (eg, drug       |          |
| 14 |                      |                      | tablet return; laboratory tests)                            |          |
| 15 |                      |                      |                                                             |          |
| 16 |                      |                      |                                                             |          |
| 17 |                      |                      |                                                             |          |
| 18 |                      |                      |                                                             |          |
| 19 | Interventions:       | <a href="#">#11d</a> | Relevant concomitant care and interventions that are        | n/a      |
| 20 |                      |                      |                                                             |          |
| 21 | concomitant care     |                      | permitted or prohibited during the trial                    |          |
| 22 |                      |                      |                                                             |          |
| 23 |                      |                      |                                                             |          |
| 24 | Outcomes             | <a href="#">#12</a>  | Primary, secondary, and other outcomes, including the       | 9-10     |
| 25 |                      |                      | specific measurement variable (eg, systolic blood           |          |
| 26 |                      |                      | pressure), analysis metric (eg, change from baseline, final | 23-24    |
| 27 |                      |                      | value, time to event), method of aggregation (eg, median,   |          |
| 28 |                      |                      | proportion), and time point for each outcome. Explanation   |          |
| 29 |                      |                      | of the clinical relevance of chosen efficacy and harm       |          |
| 30 |                      |                      | outcomes is strongly recommended                            |          |
| 31 |                      |                      |                                                             |          |
| 32 |                      |                      |                                                             |          |
| 33 |                      |                      |                                                             |          |
| 34 |                      |                      |                                                             |          |
| 35 |                      |                      |                                                             |          |
| 36 |                      |                      |                                                             |          |
| 37 |                      |                      |                                                             |          |
| 38 |                      |                      |                                                             |          |
| 39 |                      |                      |                                                             |          |
| 40 |                      |                      |                                                             |          |
| 41 | Participant timeline | <a href="#">#13</a>  | Time schedule of enrolment, interventions (including any    | 7,       |
| 42 |                      |                      | run-ins and washouts), assessments, and visits for          |          |
| 43 |                      |                      | participants. A schematic diagram is highly recommended     | Figure 1 |
| 44 |                      |                      | (see Figure)                                                |          |
| 45 |                      |                      |                                                             |          |
| 46 |                      |                      |                                                             |          |
| 47 |                      |                      |                                                             |          |
| 48 |                      |                      |                                                             |          |
| 49 |                      |                      |                                                             |          |
| 50 |                      |                      |                                                             |          |
| 51 | Sample size          | <a href="#">#14</a>  | Estimated number of participants needed to achieve          | 14       |
| 52 |                      |                      | study objectives and how it was determined, including       |          |
| 53 |                      |                      | clinical and statistical assumptions supporting any sample  |          |
| 54 |                      |                      | size calculations                                           |          |
| 55 |                      |                      |                                                             |          |
| 56 |                      |                      |                                                             |          |
| 57 |                      |                      |                                                             |          |
| 58 |                      |                      |                                                             |          |
| 59 |                      |                      |                                                             |          |
| 60 |                      |                      |                                                             |          |

|    |                                          |                      |                                                                                                                                                                                                                                                                                                                                                          |                      |
|----|------------------------------------------|----------------------|----------------------------------------------------------------------------------------------------------------------------------------------------------------------------------------------------------------------------------------------------------------------------------------------------------------------------------------------------------|----------------------|
| 1  | Recruitment                              | <a href="#">#15</a>  | Strategies for achieving adequate participant enrolment to reach target sample size                                                                                                                                                                                                                                                                      | 7-8                  |
| 2  |                                          |                      |                                                                                                                                                                                                                                                                                                                                                          |                      |
| 3  |                                          |                      |                                                                                                                                                                                                                                                                                                                                                          |                      |
| 4  |                                          |                      |                                                                                                                                                                                                                                                                                                                                                          |                      |
| 5  |                                          |                      |                                                                                                                                                                                                                                                                                                                                                          |                      |
| 6  | Allocation: sequence generation          | <a href="#">#16a</a> | Method of generating the allocation sequence (eg, computer-generated random numbers), and list of any factors for stratification. To reduce predictability of a random sequence, details of any planned restriction (eg, blocking) should be provided in a separate document that is unavailable to those who enrol participants or assign interventions | 10                   |
| 7  |                                          |                      |                                                                                                                                                                                                                                                                                                                                                          |                      |
| 8  |                                          |                      |                                                                                                                                                                                                                                                                                                                                                          |                      |
| 9  |                                          |                      |                                                                                                                                                                                                                                                                                                                                                          |                      |
| 10 |                                          |                      |                                                                                                                                                                                                                                                                                                                                                          |                      |
| 11 |                                          |                      |                                                                                                                                                                                                                                                                                                                                                          |                      |
| 12 |                                          |                      |                                                                                                                                                                                                                                                                                                                                                          |                      |
| 13 |                                          |                      |                                                                                                                                                                                                                                                                                                                                                          |                      |
| 14 |                                          |                      |                                                                                                                                                                                                                                                                                                                                                          |                      |
| 15 |                                          |                      |                                                                                                                                                                                                                                                                                                                                                          |                      |
| 16 |                                          |                      |                                                                                                                                                                                                                                                                                                                                                          |                      |
| 17 |                                          |                      |                                                                                                                                                                                                                                                                                                                                                          |                      |
| 18 |                                          |                      |                                                                                                                                                                                                                                                                                                                                                          |                      |
| 19 |                                          |                      |                                                                                                                                                                                                                                                                                                                                                          |                      |
| 20 |                                          |                      |                                                                                                                                                                                                                                                                                                                                                          |                      |
| 21 |                                          |                      |                                                                                                                                                                                                                                                                                                                                                          |                      |
| 22 |                                          |                      |                                                                                                                                                                                                                                                                                                                                                          |                      |
| 23 | Allocation concealment mechanism         | <a href="#">#16b</a> | Mechanism of implementing the allocation sequence (eg, central telephone; sequentially numbered, opaque, sealed envelopes), describing any steps to conceal the sequence until interventions are assigned                                                                                                                                                | n/a<br>(cluster-RCT) |
| 24 |                                          |                      |                                                                                                                                                                                                                                                                                                                                                          |                      |
| 25 |                                          |                      |                                                                                                                                                                                                                                                                                                                                                          |                      |
| 26 |                                          |                      |                                                                                                                                                                                                                                                                                                                                                          |                      |
| 27 |                                          |                      |                                                                                                                                                                                                                                                                                                                                                          |                      |
| 28 |                                          |                      |                                                                                                                                                                                                                                                                                                                                                          |                      |
| 29 |                                          |                      |                                                                                                                                                                                                                                                                                                                                                          |                      |
| 30 |                                          |                      |                                                                                                                                                                                                                                                                                                                                                          |                      |
| 31 |                                          |                      |                                                                                                                                                                                                                                                                                                                                                          |                      |
| 32 |                                          |                      |                                                                                                                                                                                                                                                                                                                                                          |                      |
| 33 | Allocation: implementation               | <a href="#">#16c</a> | Who will generate the allocation sequence, who will enrol participants, and who will assign participants to interventions                                                                                                                                                                                                                                | 10                   |
| 34 |                                          |                      |                                                                                                                                                                                                                                                                                                                                                          |                      |
| 35 |                                          |                      |                                                                                                                                                                                                                                                                                                                                                          |                      |
| 36 |                                          |                      |                                                                                                                                                                                                                                                                                                                                                          |                      |
| 37 |                                          |                      |                                                                                                                                                                                                                                                                                                                                                          |                      |
| 38 |                                          |                      |                                                                                                                                                                                                                                                                                                                                                          |                      |
| 39 |                                          |                      |                                                                                                                                                                                                                                                                                                                                                          |                      |
| 40 |                                          |                      |                                                                                                                                                                                                                                                                                                                                                          |                      |
| 41 | Blinding (masking)                       | <a href="#">#17a</a> | Who will be blinded after assignment to interventions (eg, trial participants, care providers, outcome assessors, data analysts), and how                                                                                                                                                                                                                | 9-10                 |
| 42 |                                          |                      |                                                                                                                                                                                                                                                                                                                                                          |                      |
| 43 |                                          |                      |                                                                                                                                                                                                                                                                                                                                                          |                      |
| 44 |                                          |                      |                                                                                                                                                                                                                                                                                                                                                          |                      |
| 45 |                                          |                      |                                                                                                                                                                                                                                                                                                                                                          |                      |
| 46 |                                          |                      |                                                                                                                                                                                                                                                                                                                                                          |                      |
| 47 |                                          |                      |                                                                                                                                                                                                                                                                                                                                                          |                      |
| 48 | Blinding (masking): emergency unblinding | <a href="#">#17b</a> | If blinded, circumstances under which unblinding is permissible, and procedure for revealing a participant's allocated intervention during the trial                                                                                                                                                                                                     | n/a                  |
| 49 |                                          |                      |                                                                                                                                                                                                                                                                                                                                                          |                      |
| 50 |                                          |                      |                                                                                                                                                                                                                                                                                                                                                          |                      |
| 51 |                                          |                      |                                                                                                                                                                                                                                                                                                                                                          |                      |
| 52 |                                          |                      |                                                                                                                                                                                                                                                                                                                                                          |                      |
| 53 |                                          |                      |                                                                                                                                                                                                                                                                                                                                                          |                      |
| 54 |                                          |                      |                                                                                                                                                                                                                                                                                                                                                          |                      |
| 55 |                                          |                      |                                                                                                                                                                                                                                                                                                                                                          |                      |
| 56 |                                          |                      |                                                                                                                                                                                                                                                                                                                                                          |                      |
| 57 |                                          |                      |                                                                                                                                                                                                                                                                                                                                                          |                      |
| 58 |                                          |                      |                                                                                                                                                                                                                                                                                                                                                          |                      |
| 59 |                                          |                      |                                                                                                                                                                                                                                                                                                                                                          |                      |
| 60 |                                          |                      |                                                                                                                                                                                                                                                                                                                                                          |                      |

|                                                                                                       |                                 |                      |                                                                                                                                                                                                                                                                                                                                                                                                              |                    |
|-------------------------------------------------------------------------------------------------------|---------------------------------|----------------------|--------------------------------------------------------------------------------------------------------------------------------------------------------------------------------------------------------------------------------------------------------------------------------------------------------------------------------------------------------------------------------------------------------------|--------------------|
| 1<br>2<br>3<br>4<br>5<br>6<br>7<br>8<br>9<br>10<br>11<br>12<br>13<br>14<br>15<br>16<br>17<br>18<br>19 | Data collection plan            | <a href="#">#18a</a> | Plans for assessment and collection of outcome, baseline, and other trial data, including any related processes to promote data quality (eg, duplicate measurements, training of assessors) and a description of study instruments (eg, questionnaires, laboratory tests) along with their reliability and validity, if known. Reference to where data collection forms can be found, if not in the protocol | 9-10,<br><br>23-24 |
| 20<br>21<br>22<br>23<br>24<br>25<br>26<br>27<br>28<br>29                                              | Data collection plan: retention | <a href="#">#18b</a> | Plans to promote participant retention and complete follow-up, including list of any outcome data to be collected for participants who discontinue or deviate from intervention protocols                                                                                                                                                                                                                    | n/a                |
| 30<br>31<br>32<br>33<br>34<br>35<br>36<br>37<br>38<br>39<br>40<br>41                                  | Data management                 | <a href="#">#19</a>  | Plans for data entry, coding, security, and storage, including any related processes to promote data quality (eg, double data entry; range checks for data values). Reference to where details of data management procedures can be found, if not in the protocol                                                                                                                                            | n/a                |
| 42<br>43<br>44<br>45<br>46<br>47<br>48<br>49                                                          | Statistics: outcomes            | <a href="#">#20a</a> | Statistical methods for analysing primary and secondary outcomes. Reference to where other details of the statistical analysis plan can be found, if not in the protocol                                                                                                                                                                                                                                     | 14-15              |
| 50<br>51<br>52<br>53<br>54<br>55<br>56<br>57<br>58<br>59<br>60                                        | Statistics: additional analyses | <a href="#">#20b</a> | Methods for any additional analyses (eg, subgroup and adjusted analyses)                                                                                                                                                                                                                                                                                                                                     | 14-15              |



|    |                      |                      |                                                             |       |
|----|----------------------|----------------------|-------------------------------------------------------------|-------|
| 1  | Statistics: analysis | <a href="#">#20c</a> | Definition of analysis population relating to protocol non- | 14-15 |
| 2  |                      |                      |                                                             |       |
| 3  | population and       |                      | adherence (eg, as randomised analysis), and any             |       |
| 4  |                      |                      |                                                             |       |
| 5  | missing data         |                      | statistical methods to handle missing data (eg, multiple    |       |
| 6  |                      |                      |                                                             |       |
| 7  |                      |                      | imputation)                                                 |       |
| 8  |                      |                      |                                                             |       |
| 9  |                      |                      |                                                             |       |
| 10 |                      |                      |                                                             |       |
| 11 | Data monitoring:     | <a href="#">#21a</a> | Composition of data monitoring committee (DMC);             | n/a   |
| 12 |                      |                      |                                                             |       |
| 13 | formal committee     |                      | summary of its role and reporting structure; statement of   |       |
| 14 |                      |                      |                                                             |       |
| 15 |                      |                      | whether it is independent from the sponsor and              |       |
| 16 |                      |                      | competing interests; and reference to where further         |       |
| 17 |                      |                      | details about its charter can be found, if not in the       |       |
| 18 |                      |                      | protocol. Alternatively, an explanation of why a DMC is     |       |
| 19 |                      |                      | not needed                                                  |       |
| 20 |                      |                      |                                                             |       |
| 21 |                      |                      |                                                             |       |
| 22 |                      |                      |                                                             |       |
| 23 |                      |                      |                                                             |       |
| 24 |                      |                      |                                                             |       |
| 25 |                      |                      |                                                             |       |
| 26 |                      |                      |                                                             |       |
| 27 |                      |                      |                                                             |       |
| 28 | Data monitoring:     | <a href="#">#21b</a> | Description of any interim analyses and stopping            | n/a   |
| 29 |                      |                      |                                                             |       |
| 30 | interim analysis     |                      | guidelines, including who will have access to these         |       |
| 31 |                      |                      |                                                             |       |
| 32 |                      |                      | interim results and make the final decision to terminate    |       |
| 33 |                      |                      |                                                             |       |
| 34 |                      |                      | the trial                                                   |       |
| 35 |                      |                      |                                                             |       |
| 36 |                      |                      |                                                             |       |
| 37 |                      |                      |                                                             |       |
| 38 | Harms                | <a href="#">#22</a>  | Plans for collecting, assessing, reporting, and managing    | n/a   |
| 39 |                      |                      |                                                             |       |
| 40 |                      |                      | solicited and spontaneously reported adverse events and     |       |
| 41 |                      |                      |                                                             |       |
| 42 |                      |                      | other unintended effects of trial interventions or trial    |       |
| 43 |                      |                      |                                                             |       |
| 44 |                      |                      | conduct                                                     |       |
| 45 |                      |                      |                                                             |       |
| 46 |                      |                      |                                                             |       |
| 47 |                      |                      |                                                             |       |
| 48 | Auditing             | <a href="#">#23</a>  | Frequency and procedures for auditing trial conduct, if     | n/a   |
| 49 |                      |                      |                                                             |       |
| 50 |                      |                      | any, and whether the process will be independent from       |       |
| 51 |                      |                      |                                                             |       |
| 52 |                      |                      | investigators and the sponsor                               |       |
| 53 |                      |                      |                                                             |       |
| 54 |                      |                      |                                                             |       |
| 55 | Research ethics      | <a href="#">#24</a>  | Plans for seeking research ethics committee / institutional | 7     |
| 56 |                      |                      |                                                             |       |
| 57 | approval             |                      | review board (REC / IRB) approval                           |       |
| 58 |                      |                      |                                                             |       |
| 59 |                      |                      |                                                             |       |
| 60 |                      |                      |                                                             |       |

|                                                                      |                                      |                      |                                                                                                                                                                                                                                    |     |
|----------------------------------------------------------------------|--------------------------------------|----------------------|------------------------------------------------------------------------------------------------------------------------------------------------------------------------------------------------------------------------------------|-----|
| 1<br>2<br>3<br>4<br>5<br>6<br>7<br>8<br>9<br>10                      | Protocol amendments                  | <a href="#">#25</a>  | Plans for communicating important protocol modifications (eg, changes to eligibility criteria, outcomes, analyses) to relevant parties (eg, investigators, REC / IRBs, trial participants, trial registries, journals, regulators) | n/a |
| 11<br>12<br>13<br>14<br>15<br>16<br>17<br>18                         | Consent or assent                    | <a href="#">#26a</a> | Who will obtain informed consent or assent from potential trial participants or authorised surrogates, and how (see Item 32)                                                                                                       | 9   |
| 19<br>20<br>21<br>22<br>23<br>24<br>25                               | Consent or assent: ancillary studies | <a href="#">#26b</a> | Additional consent provisions for collection and use of participant data and biological specimens in ancillary studies, if applicable                                                                                              | n/a |
| 26<br>27<br>28<br>29<br>30<br>31<br>32<br>33<br>34<br>35             | Confidentiality                      | <a href="#">#27</a>  | How personal information about potential and enrolled participants will be collected, shared, and maintained in order to protect confidentiality before, during, and after the trial                                               | n/a |
| 36<br>37<br>38<br>39<br>40<br>41                                     | Declaration of interests             | <a href="#">#28</a>  | Financial and other competing interests for principal investigators for the overall trial and each study site                                                                                                                      | 22  |
| 42<br>43<br>44<br>45<br>46<br>47<br>48                               | Data access                          | <a href="#">#29</a>  | Statement of who will have access to the final trial dataset, and disclosure of contractual agreements that limit such access for investigators                                                                                    | n/a |
| 49<br>50<br>51<br>52<br>53<br>54<br>55<br>56<br>57<br>58<br>59<br>60 | Ancillary and post trial care        | <a href="#">#30</a>  | Provisions, if any, for ancillary and post-trial care, and for compensation to those who suffer harm from trial participation                                                                                                      | n/a |

|    |                       |                      |                                                               |     |
|----|-----------------------|----------------------|---------------------------------------------------------------|-----|
| 1  | Dissemination         | <a href="#">#31a</a> | Plans for investigators and sponsor to communicate trial      | 2-3 |
| 2  |                       |                      |                                                               |     |
| 3  | policy: trial results |                      | results to participants, healthcare professionals, the        |     |
| 4  |                       |                      | public, and other relevant groups (eg, via publication,       |     |
| 5  |                       |                      | reporting in results databases, or other data sharing         |     |
| 6  |                       |                      | arrangements), including any publication restrictions         |     |
| 7  |                       |                      |                                                               |     |
| 8  |                       |                      |                                                               |     |
| 9  |                       |                      |                                                               |     |
| 10 |                       |                      |                                                               |     |
| 11 |                       |                      |                                                               |     |
| 12 |                       |                      |                                                               |     |
| 13 | Dissemination         | <a href="#">#31b</a> | Authorship eligibility guidelines and any intended use of     | n/a |
| 14 |                       |                      |                                                               |     |
| 15 | policy: authorship    |                      | professional writers                                          |     |
| 16 |                       |                      |                                                               |     |
| 17 |                       |                      |                                                               |     |
| 18 |                       |                      |                                                               |     |
| 19 | Dissemination         | <a href="#">#31c</a> | Plans, if any, for granting public access to the full         | n/a |
| 20 |                       |                      |                                                               |     |
| 21 | policy: reproducible  |                      | protocol, participant-level dataset, and statistical code     |     |
| 22 |                       |                      |                                                               |     |
| 23 | research              |                      |                                                               |     |
| 24 |                       |                      |                                                               |     |
| 25 |                       |                      |                                                               |     |
| 26 | Informed consent      | <a href="#">#32</a>  | Model consent form and other related documentation            | n/a |
| 27 |                       |                      |                                                               |     |
| 28 | materials             |                      | given to participants and authorised surrogates               |     |
| 29 |                       |                      |                                                               |     |
| 30 |                       |                      |                                                               |     |
| 31 |                       |                      |                                                               |     |
| 32 | Biological specimens  | <a href="#">#33</a>  | Plans for collection, laboratory evaluation, and storage of   | n/a |
| 33 |                       |                      |                                                               |     |
| 34 |                       |                      | biological specimens for genetic or molecular analysis in     |     |
| 35 |                       |                      |                                                               |     |
| 36 |                       |                      | the current trial and for future use in ancillary studies, if |     |
| 37 |                       |                      |                                                               |     |
| 38 |                       |                      | applicable                                                    |     |
| 39 |                       |                      |                                                               |     |
| 40 |                       |                      |                                                               |     |

41  
 42 The SPIRIT checklist is distributed under the terms of the Creative Commons Attribution License CC-  
 43 BY-ND 3.0. This checklist can be completed online using <https://www.goodreports.org/>, a tool made  
 44 by the [EQUATOR Network](#) in collaboration with [Penelope.ai](#)  
 45  
 46  
 47  
 48  
 49  
 50  
 51  
 52  
 53  
 54  
 55  
 56  
 57  
 58  
 59  
 60

# BMJ Open

## A school-based, multi-faceted health promotion programme to prevent obesity among children: protocol of a cluster-randomized controlled trial (the DECIDE-children study)

|                                 |                                                                                                                                                                                                                                                                                                                                                                                                                                                                                                                                                                                                                                                                                                                                                                                                                                                                                                                                                                                                                                                                                                                                                                                                                                         |
|---------------------------------|-----------------------------------------------------------------------------------------------------------------------------------------------------------------------------------------------------------------------------------------------------------------------------------------------------------------------------------------------------------------------------------------------------------------------------------------------------------------------------------------------------------------------------------------------------------------------------------------------------------------------------------------------------------------------------------------------------------------------------------------------------------------------------------------------------------------------------------------------------------------------------------------------------------------------------------------------------------------------------------------------------------------------------------------------------------------------------------------------------------------------------------------------------------------------------------------------------------------------------------------|
| Journal:                        | <i>BMJ Open</i>                                                                                                                                                                                                                                                                                                                                                                                                                                                                                                                                                                                                                                                                                                                                                                                                                                                                                                                                                                                                                                                                                                                                                                                                                         |
| Manuscript ID                   | bmjopen-2018-027902.R1                                                                                                                                                                                                                                                                                                                                                                                                                                                                                                                                                                                                                                                                                                                                                                                                                                                                                                                                                                                                                                                                                                                                                                                                                  |
| Article Type:                   | Protocol                                                                                                                                                                                                                                                                                                                                                                                                                                                                                                                                                                                                                                                                                                                                                                                                                                                                                                                                                                                                                                                                                                                                                                                                                                |
| Date Submitted by the Author:   | 01-Aug-2019                                                                                                                                                                                                                                                                                                                                                                                                                                                                                                                                                                                                                                                                                                                                                                                                                                                                                                                                                                                                                                                                                                                                                                                                                             |
| Complete List of Authors:       | <p>Liu, Zheng; Peking University, Department of Maternal and Child Health, School of Public Health<br/> Wu, Yangfeng; Peking University Clinical Research Institute, Peking University Clinical Research Institute<br/> Niu, Wen-Yi; Peking University, Department of Social Medicine and Health Education, School of Public Health<br/> Feng, Xiangxian; Changzhi Medical College, Changzhi Medical College<br/> Lin, Yi; Urumqi Primary and Secondary School Health Care Center, Urumqi Primary and Secondary School Health Care Center<br/> Gao, Aiyu; Dongcheng Primary and Secondary School Health Care Center, Dongcheng Primary and Secondary School Health Care Center<br/> Zhang, Fang; Mentougou Primary and Secondary School Health Care Center, Mentougou Primary and Secondary School Health Care Center<br/> Fang, Hai; Peking University, China Center for Health Development Studies<br/> GAO, Pei; Peking University, Department of Epidemiology and Biostatistics, School of Public Health<br/> Li, Hui-Juan; Peking University Clinical Research Institute, Peking University Clinical Research Institute<br/> Wang, Haijun; School of Public Health, Peking University, Department of Maternal and Child Health</p> |
| <b>Primary Subject Heading</b>: | Epidemiology                                                                                                                                                                                                                                                                                                                                                                                                                                                                                                                                                                                                                                                                                                                                                                                                                                                                                                                                                                                                                                                                                                                                                                                                                            |
| Secondary Subject Heading:      | Paediatrics, Public health                                                                                                                                                                                                                                                                                                                                                                                                                                                                                                                                                                                                                                                                                                                                                                                                                                                                                                                                                                                                                                                                                                                                                                                                              |
| Keywords:                       | pediatric obesity, cluster, prevention, randomized controlled trial                                                                                                                                                                                                                                                                                                                                                                                                                                                                                                                                                                                                                                                                                                                                                                                                                                                                                                                                                                                                                                                                                                                                                                     |
|                                 |                                                                                                                                                                                                                                                                                                                                                                                                                                                                                                                                                                                                                                                                                                                                                                                                                                                                                                                                                                                                                                                                                                                                                                                                                                         |

SCHOLARONE™  
Manuscripts

1  
2  
3  
4 1 **A school-based, multi-faceted health promotion programme to**  
5  
6 2 **prevent obesity among children: protocol of a cluster-randomized**  
7  
8 3 **controlled trial (the DECIDE-children study)**  
9  
10  
11  
12 4

13  
14 5 Zheng Liu<sup>1</sup>, Yang-Feng Wu<sup>2</sup>, Wen-Yi Niu<sup>3</sup>, Xiang-Xian Feng<sup>4</sup>, Yi Lin<sup>5</sup>, Ai-Yu Gao<sup>6</sup>,  
15  
16 6 Fang Zhang<sup>7</sup>, Hai Fang<sup>8</sup>, Pei Gao<sup>9</sup>, Hui-Juan Li<sup>2</sup>, Hai-Jun Wang<sup>1</sup>, the study team for  
17  
18 7 the DECIDE-children study  
19  
20  
21

22 8 1 Department of Maternal and Child Health, School of Public Health, Peking University,  
23  
24 9 Beijing, China; 2 Peking University Clinical Research Institute, Beijing, China; 3  
25  
26 10 Department of Social Medicine and Health Education, School of Public Health, Peking  
27  
28 11 University, Beijing, China; 4 Changzhi Medical College, Shanxi, China; 5 Urumqi  
29  
30 12 Primary and Secondary School Health Care Center, Xinjiang, China; 6 Dongcheng  
31  
32 13 Primary and Secondary School Health Care Center, Beijing, China; 7 Mentougou  
33  
34 14 Primary and Secondary School Health Care Center, Beijing, China; 8 China Center for  
35  
36 15 Health Development Studies, Peking University, Beijing, China; 9 Department of  
37  
38 16 Epidemiology and Biostatistics, School of Public Health, Peking University, Beijing,  
39  
40 17 China  
41  
42  
43  
44  
45  
46  
47  
48  
49  
50

51 19 Corresponding author:

52  
53 20 Professor Hai-Jun Wang, Department of Maternal and Child Health, School of Public  
54  
55 21 Health, Peking University. No. 38 Xueyuan Road, Haidian District, 100191 Beijing,  
56  
57 22 China. Email: whjun@pku.edu.cn  
58  
59  
60

1  
2  
3  
4 23**Abstract**5  
6 24 **Introduction** Obesity is an increasingly serious public health concern globally.7  
8  
9 25 Effective and sustainable childhood obesity prevention strategies would have potential10  
11 26 to help and may have impact on its lifelong health. However, few such strategies have12  
13  
14 27 been rigorously evaluated for Chinese children in different regions of China.15  
16 28 **Methods and analysis** DECIDE-Children is a cluster-randomized controlled trial that17  
18  
19 29 aims to assess the effectiveness and sustainability of a school-based, multi-faceted20  
21 30 intervention to prevent obesity among Grade 4 primary school students (8 to 10 years22  
23  
24 31 old) in China. Twenty-four schools (approximately 1200 students) from the more than25  
26  
27 32 average, average and less than average developed regions in China will be randomized28  
29  
30 33 to intervention (12 schools) or usual practice (12 schools). The intervention will last for31  
32  
33 34 one year and consist of activities towards students, parents and school environment. A34  
35  
36 35 smartphone application will be used to assist in implementation of the intervention.36  
37  
38 36 Data will be collected at baseline, 4 months, 9 months and 21 months. The primary38  
39  
40 37 outcome is the difference between arms in the change of students' body mass index41  
42  
43 38 (BMI) at 9 months after the baseline investigation. The secondary outcomes include the43  
44  
45 39 differences between arms in the change of anthropometric measures, diet, physical46  
47  
48 40 activity and other measures at follow-up visits. A range of process evaluation methods48  
49  
50 41 will be used to determine implementation of the complex intervention.51  
52  
53 42 **Ethics and dissemination** This study has been approved by the Peking University53  
54  
55 43 Institution Review Board (IRB00001052-18021). Results will be disseminated through55  
56  
57 44 publication in peer-reviewed journals, presentation at conferences and in lay summaries57  
58  
59  
60

1  
2  
3  
4  
5  
6  
7  
8  
9  
10  
11  
12  
13  
14  
15  
16  
17  
18  
19  
20  
21  
22  
23  
24  
25  
26  
27  
28  
29  
30  
31  
32  
33  
34  
35  
36  
37  
38  
39  
40  
41  
42  
43  
44  
45  
46  
47  
48  
49  
50  
51  
52  
53  
54  
55  
56  
57  
58  
59  
60

45 provided to school staff and participants.

46 **Trial registration** ClinicalTrials.gov: NCT03665857.

For peer review only

1  
2  
3  
4 **47 Strengths and limitations of this study**

5  
6  
7 48 1. This study will rigorously evaluate the effectiveness and scalability of a childhood  
8  
9 49 obesity prevention programme in eastern, central and western regions with different  
10  
11 50 levels of economic development in China.

12  
13  
14 51 2. We will employ a smartphone application to assist in implementation of the complex  
15  
16 52 intervention, including information diffusion, behavior monitoring, weight  
17  
18 53 management, assessment and feedback.

19  
20  
21  
22 54 3. We will include an explicit process evaluation plan for both intervention and control  
23  
24 55 groups, determining the implementation of the complex intervention.

25  
26  
27 56 4. A follow-up investigation will be conducted to evaluate the sustainability of the  
28  
29 57 intervention.

30  
31  
32 58 5. This intervention is limited by a relatively short duration, but further funding will be  
33  
34 59 sought for a potential longer-term intervention in future.  
35  
36  
37  
38  
39  
40  
41  
42  
43  
44  
45  
46  
47  
48  
49  
50  
51  
52  
53  
54  
55  
56  
57  
58  
59  
60



## 60 **Introduction**

61 Childhood obesity is a significant public health concern worldwide [1, 2]. China has  
62 seen a dramatic increase in childhood obesity with the economy fast growing over the  
63 past decades. The prevalence of obesity among 7-18 y Chinese children increased from  
64 0.1% in 1985 to 7.3% in 2014 [2]. Childhood obesity is not only associated with adverse  
65 consequences on physical and mental health of children in the short term [3, 4], but also  
66 increases risk of developing cardiovascular diseases in the long term [5, 6]. Accordingly,  
67 effective strategies to curb and reduce childhood obesity prevalence would bear great  
68 long-term potential to prevent cardiovascular diseases in whole population.

69 Development of childhood obesity is complex and may involve multi-factorial  
70 mechanisms, but it basically results from an imbalance of energy intake and energy  
71 expenditure in most cases. Children spend half of their waking hours and consume at  
72 least one-third of their daily calories at school, and thus school-based interventions are  
73 promising in preventing childhood obesity [7]. Particularly, multi-faceted interventions  
74 combining diet, physical activity and a family component have shown the greatest  
75 effectiveness [7, 8]. However, there is a paucity of rigorously developed and evaluated  
76 prevention interventions for Chinese children [8, 9]. Moreover, not all school-based  
77 interventions were effective in preventing excessive weight gain of children [10, 11].  
78 On one hand, it is crucial to increase our understanding of how and why these  
79 interventions work or do not work [12]. To achieve this, a thorough process evaluation  
80 of the intervention implementation is necessary. On the other hand, socioeconomic  
81 development is associated with patterns of childhood obesity [13] and may also affect

1  
2  
3  
4 82 the effectiveness of a childhood obesity intervention. Yet previous studies have been  
5  
6 83 largely conducted in a single region, which limits the generalizability of study findings  
7  
8  
9 84 to other populations. Another weakness is that most studies examined outcomes only  
10  
11 85 at the end of the intervention. Thus, it remains unclear whether healthy behaviors and  
12  
13  
14 86 weight continue beyond the period of the intervention.  
15  
16

### 17 ***School system in China***

18  
19 88 In primary schools in China, there are six grades in total, with age of students ranging  
20  
21  
22 89 from 6 to 11 years. The usual size of a class is less than 45, but varies in different  
23  
24  
25 90 schools, ranging from 30 to 60. There are two school policies issued by Chinese  
26  
27 91 government that are particularly relevant to prevention and management of childhood  
28  
29  
30 92 obesity. First, schools should have the school doctor or health care teachers who provide  
31  
32  
33 93 in-house school health care. Their routine practices include student health surveillance,  
34  
35  
36 94 health education for students, prevention and control of common diseases of students.  
37  
38 95 Second, schools should implement ‘One-Hour Physical Activity On Campus Every  
39  
40  
41 96 School Day’. That is, the total time of physical activity (i.e. physical education classes,  
42  
43  
44 97 class-break exercise and extracurricular activities) per school day should be no less than  
45  
46  
47 98 one hour. However, implementation of these policies in school system is varying in  
48  
49  
50 99 different regions in China [14].

### 100 ***Development of a childhood obesity intervention***

101 To fill in the research gaps and in accordance with school system in China, we  
102 underwent four stages to develop the intervention: (1) we systematically reviewed  
103 previous literature to identify intervention elements related to intervention effectiveness;

1  
2  
3  
4 104 (2) we conducted focus group discussions and interviews with key informants (children,  
5  
6 105 parents, teachers, school principals, local health and education officials) to further  
7  
8  
9 106 revise and refine the intervention approaches; (3) to test feasibility of the proposed  
10  
11  
12 107 intervention, we also undertook a three-month, before-after, pilot study at two primary  
13  
14 108 schools in Beijing (one in the urban area and the other in the rural area) among 58 Grade  
15  
16  
17 109 4 students (mean age:  $9.38 \pm 0.49$  years)[15]; (4) we further discussed the proposed  
18  
19  
20 110 intervention with multiple experts. Based on all the work mentioned, we finally  
21  
22 111 developed the intervention elements used for this study.

### 112 *Aim and objectives*

113 To develop effective lifestyle interventions for prevention and control of cardiovascular  
114 disease in China, the Diet, ExerCIse and CarDiovascular hEalth (DECIDE) project was  
115 initiated in 2016. As one of five independent DECIDE studies, the DECIDE-Children  
116 study is to develop a school-based, multi-faceted childhood obesity prevention  
117 programme targeting on school children aged 8-10 years in three different regions of  
118 China and rigorously test its effect in preventing excessive weight gain in Chinese  
119 primary school settings. The research objectives of the DECIDE-Children were: (1) to  
120 assess the effectiveness of the intervention compared with usual practice in preventing  
121 childhood overweight and obesity; (2) to determine the sustainability of the intervention  
122 in preventing overweight and obesity; (3) to undertake process evaluation and health  
123 economic evaluation of the intervention.

### 124 **Methods and analysis**

125 This protocol has been prepared in accordance with the Standard Protocol Items:

1  
2  
3  
4 126 Recommendations for Interventional Trials (SPIRIT) statement [16, 17].  
5

6  
7 127 ***Study design***  
8

9 128 DECIDE-Children is a cluster-randomized, parallel-group controlled trial. To  
10  
11 129 accommodate with the social and economic variations within the country and increase  
12  
13 130 the scalability of our interventions, we will intentionally select study schools from three  
14  
15 131 different regions of China, the more than average developed area in the east (Beijing),  
16  
17 132 the average developed area in the central (Shanxi) and the less than average developed  
18  
19 133 area in the west (Xinjiang). A total of 24 primary schools (clusters) equally distributed  
20  
21 134 among three regions will be selected. In Beijing, 4 schools will be selected from  
22  
23 135 Dongcheng district (located in the central city) and 4 from Mentougou district (located  
24  
25 136 in a suburban rural area). In Xinjiang, all 8 schools will be selected in Urumchi, the  
26  
27 137 capital city of the autonomous region; and half of the schools will be selected from  
28  
29 138 Shayiba district (an urban district) and half from Shuimogou district (a rural district).  
30  
31 139 In Shanxi, all 8 schools will be selected from only one urban district of Changzhi, a  
32  
33 140 small to medium size city in the province. The reason for excluding rural schools in  
34  
35 141 Changzhi is that most of these schools were boarding schools. Thus, a total of 24  
36  
37 142 primary schools from five sites in three regions will be selected and randomized into  
38  
39 143 two groups, one on the obesity prevention intervention and the other on usual practice.  
40  
41 144 The intervention will be implemented for one school year from late September 2018 to  
42  
43 145 June 2019, and the study will continue with a one-year follow-up investigation in June  
44  
45 146 2020. Figure 1 shows the study flow.  
46  
47  
48  
49  
50  
51  
52  
53  
54  
55  
56  
57

58 147 ***Recruitment***  
59  
60

## 148 **Recruitment of schools**

149 The present study will be carried out in Grade 4 students (8 to 10 years old), as they are  
150 old enough to understand health education information and able to remain in the same  
151 school to complete the two-year study before they graduate. To be eligible, the school  
152 principal should agree with randomization procedure and compliance with the study  
153 protocol. The total number of Grade 4 students must be more than 50 in the school, and  
154 the school have not implemented or are not going to implement an obesity prevention  
155 or similar intervention program. Boarding schools, special schools for children with  
156 talent skills or minority ethnic groups will be excluded. Schools will also not be  
157 included if they have a definite plan for relocation or cancellation in the next two years.  
158 For schools participating the program, the size of a class varies from less than 30 to  
159 approximately 60 children a class. To meet the sample size requirement, we will recruit  
160 two classes of the school if the number of students in each class is less than 50 and one  
161 class otherwise. If the number of classes in one school is more than needed, the school  
162 principal will recommend which classes to be selected.  
163 Three steps will be undertaken for the recruitment of schools. First, project staff will  
164 contact the local education authority to gain their opinion, support, approval and basic  
165 information of the schools (type of schools, number of students and teachers). Second,  
166 project staff will approach the schools by a phone call or a visit to understand the  
167 eligibility of the potential schools for participation. Third, the final list of eligible  
168 schools and classes will be made by the principal investigator and schools will be  
169 invited by local research partners.

1  
2  
3  
4 **170 Recruitment of students**

5  
6 171 After recruiting schools and before the baseline examination, written informed consent  
7  
8  
9 172 will be provided to all students and their primary caregivers (parents in most cases) in  
10  
11 173 the selected classes. Then parents with informed consent will be required to fill in a  
12  
13 174 self-administrative questionnaire about health status of their children. The project staff  
14  
15 175 will collect the questionnaires and if find one or more of the following conditions  
16  
17 176 reported by parents, their children will be excluded: 1) medical history of heart disease,  
18  
19 177 hypertension, diabetes, tuberculosis, asthma, hepatitis or nephritis; 2) obesity caused by  
20  
21 178 endocrine diseases or side effects of drugs; 3) abnormal physical development like  
22  
23 179 dwarfism or gigantism; 4) being physically incomplete and deformed such as severe  
24  
25 180 scoliosis, pectus carinatum, limp, obvious O-leg or X-leg; 5) inability to participate in  
26  
27 181 school sports activities; 6) having been losing weight by vomiting or taking drugs  
28  
29 182 during the past three months.

30  
31  
32  
33  
34  
35  
36  
37 183 ***Randomization procedures***

38  
39  
40 184 The random sequence of allocation of schools (clusters) to intervention or control will  
41  
42 185 be stratified by the study sites. Schools in the same study site will be randomly allocated  
43  
44 186 in 1:1 ratio to either the intervention or control group using a computer-generated  
45  
46 187 random number system (the simple random sampling method). Randomization will be  
47  
48 188 performed by an independent person at the central coordinating center at Peking  
49  
50 189 University Clinical Research Institute. The randomization will take place only after the  
51  
52 190 baseline assessments complete to ensure the allocation concealment.

53  
54  
55  
56  
57  
58 191 ***Intervention***

1  
2  
3  
4 192 We used Social Ecological Model to identify intervention elements in this multi-faceted  
5  
6 193 health promotion programme [18]. As shown in Figure 2, the programme will target  
7  
8  
9 194 the influencing factors of childhood obesity at both individual (student-focused  
10  
11 195 activities) and environmental levels (providing a supportive family and school  
12  
13 196 environment), with the intent to influence knowledge, attitude and behaviors of school  
14  
15 197 children.

### 198 **Description of the intervention components**

199 The intervention components are described in Table 1 and 2.

200 ***Student-focused activities:*** These will include health education activities for students,  
201 reinforcement of students' physical activity within school and regular monitoring of  
202 students' weight and height.

203 ***Activities towards parents:*** These will include health education activities for parents,  
204 supervision and encouragement of children to increase physical activity outside school.

205 ***Activities towards schools:*** These will include school policies related to obesity  
206 prevention and health education activities for teachers.

207 ***The smartphone app:*** Project staff, school teachers and parents will be suggested to  
208 install the app--"Eat Wisely, Move Happily". The app, developed based on behavior  
209 change techniques [19], will be assisted in implementation of the intervention,  
210 including information diffusion, behavior monitoring, weight management, assessment  
211 and feedback.

### 212 **Quality control of the intervention**

213 Two manuals ("An Operation Manual for Project Staff Involving in the Multi-

1  
2  
3  
4 214 component Obesity Intervention among Primary School Students” and “An Operation  
5  
6 215 Manual for School Team Members Involving in the Multi-component Obesity  
7  
8  
9 216 Intervention among Primary School Students”) have been developed for implementing  
10  
11  
12 217 and managing this complex intervention. They describe in detail the duties of project  
13  
14 218 staff and school team members (school principals, class teachers, physical education  
15  
16  
17 219 teachers, school doctors/health care teachers) in delivering the intervention,  
18  
19  
20 220 respectively. The manuals also describe the detailed workflow of implementation for  
21  
22 221 each intervention component, i.e., who, when, how and to what extent the specific  
23  
24 222 intervention element should be delivered. All of the project staff and school team  
25  
26  
27 223 members will be required to carry out the intervention in accordance with the operation  
28  
29  
30 224 manuals.

31  
32 225 During implementation of the intervention, regular field observation and checking of  
33  
34  
35 226 smartphone app records will also be applied. To improve fidelity, if it is found that  
36  
37  
38 227 schools are not complying with the study protocol, project staff will timely  
39  
40  
41 228 communicate with school team members and continue with follow-up supervision.

#### 42 43 229 ***Control group***

44  
45 230 The twelve schools in the control group will not carry out any interventions delivered  
46  
47  
48 231 by the study and will continue usual practice according to their own teaching curriculum  
49  
50  
51 232 during the study period (from September 2018 to June 2020). Participants in the control  
52  
53  
54 233 group will receive the health education materials that will have been delivered to those  
55  
56  
57 234 in the intervention group as soon as the 21-month follow-up investigation be completed  
58  
59  
60 235 in June 2020.



1  
2  
3  
4 236 ***Outcome evaluation***  
5

6 237 Table 3 describes what, when and how the study outcomes will be evaluated. Baseline  
7  
8 238 measurements will be conducted in September 2018 for both intervention and control  
9  
10  
11 239 groups. Follow-up measurements will be undertaken at 4 months after baseline  
12  
13  
14 240 measurements in January (one school semester and in the half of the intervention), 9  
15  
16  
17 241 months after baseline measurements in June 2019 (one school year and immediately  
18  
19  
20 242 whole intervention program completed) and 21 months after baseline measurements in  
21  
22 243 June 2020 (two school years and 12 months after the intervention completion).  
23

24 244 At the baseline and all follow-up visits, anthropometric measures (height, weight, waist  
25  
26  
27 245 and hip circumference, systolic and diastolic blood pressures, body fat percentage) and  
28  
29  
30 246 physical fitness measures (one-minute rope jumping, one-minute sit-up, long standing  
31  
32  
33 247 jump, shuttle run (50 m×8)) will be collected by the trained outcome assessors using  
34  
35  
36 248 uniform device and/or forms according to the standard methods and procedures. The  
37  
38 249 assessors measuring students' height and weight will be blinded to group allocation of  
39  
40  
41 250 the schools. We will use questionnaires to measure students' behaviors (duration of  
42  
43  
44 251 moderate-to-vigorous physical activity, eating behavior, sedentary behavior), school  
45  
46  
47 252 policies for prevention and management of childhood obesity, and other potential  
48  
49  
50 253 moderators/mediators of the intervention (e.g. stage of change related to weight  
51  
52  
53 254 reduction behavior). Questionnaires were developed based on previous studies and the  
54  
55  
56 255 pilot study. They were found to be feasible and acceptable to students and their parents  
57  
58  
59 256 [20-22].  
60

60 257 ***Outcomes***

1  
2  
3  
4 258 The primary outcome is the difference between arms in the change of students' body  
5  
6 259 mass index ( $BMI = \text{weight (kg)} / (\text{height (m)})^2$ ) immediately after the intervention  
7  
8  
9 260 completion (9 months after the baseline examination). The secondary outcomes include  
10  
11 261 the change of BMI in one year after the intervention completion. In addition, we will  
12  
13  
14 262 also compare the following indices between arms at follow-up visits: 1) change in  
15  
16  
17 263 students' BMI-Z (standard deviation score will be calculated based on World Health  
18  
19 264 Organization criteria [23]); 2) change in prevalence and incidence of childhood  
20  
21  
22 265 overweight/obesity defined according to the criteria for Chinese children and  
23  
24  
25 266 adolescents [24]; 3) change in students' waist circumference, waist-to-hip  
26  
27 267 circumference ratio and systolic and diastolic blood pressures; and 4) change in students'  
28  
29  
30 268 body fat percentage, physical fitness measures, behavioral and other outcomes.

### 31 32 269 *Sample size estimation*

33  
34  
35 270 We assumed the difference between two groups in change in BMI (effect size) would  
36  
37 271 be  $0.50 \text{ kg/m}^2$ , a standard deviation (SD) of BMI would be  $1.40 \text{ kg/m}^2$ , an intra-cluster  
38  
39  
40 272 correlation coefficient would be 0.05 and the rate of attrition would be 10% for sample  
41  
42  
43 273 size calculation in our study. We aimed to recruit a total of 1,200 students from 24  
44  
45  
46 274 schools with an average cluster size of 50 students per school. This sample size will  
47  
48 275 provide 88% power with  $\alpha = 0.05$  to detect a mean difference of  $0.50 \text{ kg/m}^2$  in change of  
49  
50  
51 276 BMI between groups after the one-school-year intervention.

### 52 53 277 *Statistical analyses*

54  
55  
56 278 Statistical analyses will be performed using SAS version 9.4 (SAS Institute Inc., Cary,  
57  
58 279 NC, USA). All statistical tests will be two-sided at 5% level of significance. Baseline

1  
2  
3  
4 280 characteristics at both school- and individual-level will be reported by using descriptive  
5  
6 281 statistics.

7  
8  
9 282 The primary analysis will be based on the intention-to-treat principle including all  
10  
11 283 students recruited with the baseline BMI measured. Generalized linear mixed models  
12  
13  
14 284 will be used to compare the primary and secondary outcomes at 4 and/or 9 and/or 21  
15  
16  
17 285 months after the baseline, adjusting for the clustering effect and baseline outcome  
18  
19 286 values. The missing data will be treated in the maximum likelihood estimates assuming  
20  
21  
22 287 they are missing at random. The intra-cluster correlation coefficient will also be  
23  
24  
25 288 estimated. Sensitivity analysis will be considered on the primary outcome using the  
26  
27 289 last-value-carry-forward imputation if missing data exceeds 5%. For continuous  
28  
29  
30 290 outcomes, we will report pre-, post-intervention means for intervention and control  
31  
32 291 groups, respectively, and model-adjusted mean differences between groups. For binary  
33  
34  
35 292 outcomes, we will report pre-, post-intervention percentages for intervention and  
36  
37  
38 293 control groups, respectively, and adjusted odds ratio (OR) between groups. The 95%  
39  
40 294 confidence interval (CI) and associated *P*-value will be calculated. We will also  
41  
42  
43 295 examine whether any difference in outcomes between control and intervention arms  
44  
45  
46 296 varies by children sex, socioeconomic factor (mother's education), BMI status at  
47  
48 297 baseline and primary caregivers of children (parents as compared with non-parents).

49  
50 298 ***Process evaluation***

51  
52  
53 299 The process evaluation will be conducted in intervention schools throughout the project  
54  
55  
56 300 period to monitor and document the implementation of the intervention. It also aims to  
57  
58  
59 301 aid in understanding the relationship between specific intervention elements and  
60

1  
2  
3  
4 302 outcomes. The control schools will also be monitored for “treatment as usual”.

5  
6 303 Based on the steps and principles described in the conceptual framework by Saunders

7  
8  
9 304 et al.[25], we will identify the process evaluation elements including fidelity (the extent

10  
11 305 to which the intervention will be implemented as initially planned), dose delivered (the

12  
13 306 frequency and intensity of actual implementation of the program), dose received (the

14  
15 307 extent to which students/primary caregivers (parents in most cases)/teachers will be

16  
17 308 exposed to the intervention, as well as the degree of their satisfaction with intervention

18  
19 309 and materials), reach (the proportions and the characteristics of students/primary

20  
21 310 caregivers/teachers completing or dropping out of the intervention) and context (family

22  
23 311 environment and school policies related to obesity prevention and management).

24  
25 312 The methods of process data collection will include: (1) direct regular field observation

26  
27 313 and records collected for quality control of the intervention (e.g., quality and quantity

28  
29 314 of the intervention sessions, number of students attending the lectures); (2) the user logs

30  
31 315 (e.g., frequency and duration) collected by the smartphone app; and (3) student and

32  
33 316 parent questionnaires (Table 3) on students’ behaviors and family environment in both

34  
35 317 intervention and control schools; (4) school questionnaires on school policies related to

36  
37 318 obesity prevention and management in both intervention and control schools; (5)

38  
39 319 interviews with participants (6~8 students per school) conducted in follow-up

40  
41 320 investigations in both intervention and control schools.

42  
43 321 ***Health economic evaluation***

44  
45 322 A cost-effectiveness analysis will be employed in the health economic evaluation, and

46  
47 323 a societal perspective is used to examine whether the intervention is economically

1  
2  
3  
4 324 feasible. Intervention costs include times (project staff, school staff, and students'  
5  
6 325 primary caregivers (parents in most cases)) for all the intervention activities and  
7  
8  
9 326 material expenses. Only time of project staff spent in implementing the intervention  
10  
11 327 will be included. Time costs are based on personal employment compensations if  
12  
13  
14 328 available or average compensations in the local areas for similar types of employees.  
15  
16  
17 329 Material expenses are based on real purchasing prices. An incremental cost-  
18  
19 330 effectiveness ratio will be calculated and a sensitivity analysis will be used to vary key  
20  
21  
22 331 parameters to examine the robustness of health economic results.

### 332 **Patient and Public involvement**

333 We conducted focus group discussions and interviews with key stakeholders (children,  
334 parents, teachers, school principals, local health, and education officials) refining the  
335 intervention approaches. We do not involve any of them in other research work in the  
336 study including the idea development, design, implementation, data collection, analysis  
337 and interpretation. Results of the study will be disseminated through publication in  
338 peer-reviewed journals, presentation at conferences and in lay summaries provided to  
339 school staff, students and parents. The benefits and burden of the intervention will be  
340 assessed by children and their primary caregivers through self-reported questionnaires  
341 at the end of intervention.

### 342 **Trial status**

343 The trial started and completed recruitment of schools and children in September 2018.  
344 Baseline measures commenced in late September 2018 and completed by the end of  
345 September in 2018. The one-school-year intervention started at the end of September

1  
2  
3  
4 346 in 2018 and completed in June 2019. The 4-month follow-up measurements started and  
5  
6 347 completed in January 2019. The 9-month follow-up measurements started and  
7  
8  
9 348 completed in June 2019. The 21-month follow-up measurements will start and complete  
10  
11  
12 349 in June 2020.

### 13 14 350 **Ethics and dissemination**

15  
16  
17 351 This study was reviewed and has been approved by the Peking University Institution  
18  
19 352 Review Board (IRB00001052-18021). Any amendments to the study protocol will be  
20  
21  
22 353 submitted for IRB approval prior to implementation. Written informed consent will be  
23  
24 354 obtained from all students and their parents. All data collected will be entered into  
25  
26  
27 355 electronic database with personal identification information de-identified. The database  
28  
29  
30 356 will be accessed only by designated staff with password. Results will be disseminated  
31  
32  
33 357 through publication in peer-reviewed journals, presentation at conferences and in lay  
34  
35 358 summaries provided to school staff and participants. On completion of the trial, and  
36  
37  
38 359 after publication of these results, data would be available on request by contacting the  
39  
40  
41 360 corresponding author of this protocol.

### 42 43 361 **Discussion**

44  
45 362 Non-communicable diseases, especially cardiovascular diseases, have been the public  
46  
47  
48 363 health burden among the whole population. Preventing childhood obesity in early life  
49  
50  
51 364 could have the greatest long-term potential to curb this epidemic burden. Although  
52  
53  
54 365 several childhood obesity intervention studies have been conducted in China, research  
55  
56 366 gaps existed in terms of methodological flaws, process measures, scalability and  
57  
58  
59 367 sustainability of the intervention. Based on a theory-driven and systematic development  
60

1  
2  
3  
4 368 during its formative phase (e.g., systematic review [8], qualitative interviews, panel  
5  
6 369 discussions and a piloted study [15]), the DECIDE-Children study provides one of the  
7  
8  
9 370 first examples of rigorous development and evaluation of a childhood obesity  
10  
11 371 prevention programme implemented in eastern, central and western regions of China.  
12  
13  
14 372 This study has several distinguishing features: 1) randomization by an independent  
15  
16 373 person not involved in the study, blinding of key outcome measures, and a detailed  
17  
18 374 process evaluation plan will help to provide study results with high quality; 2) a follow-  
19  
20 375 up investigation one year after the intervention completion will be conducted to  
21  
22 376 determine the sustainability of the intervention; 3) a smartphone app with functions of  
23  
24 377 information diffusion, behavior monitoring, weight management, assessment and  
25  
26 378 feedback is employed to assist in implementation of the intervention; 4) three centers  
27  
28 379 located in eastern, central and western regions of China will be involved to reflect  
29  
30 380 different levels of economic development in China; 5) most of the intervention  
31  
32 381 components (school polices, regular monitoring of students' weight and height,  
33  
34 382 reinforcement of students' physical activity within school, health education activities  
35  
36 383 for students) will be integrated into the regular academic schedule of each intervention  
37  
38 384 school.  
39  
40  
41  
42  
43  
44  
45  
46  
47  
48  
49  
50  
51  
52  
53  
54  
55  
56  
57  
58  
59  
60

## References

1. Ng M, Fleming T, Robinson M, et al. Global, regional, and national prevalence of overweight and obesity in children and adults during 1980-2013: a systematic analysis for the Global Burden of Disease Study 2013. *Lancet*, 2014, 384: 766-781.
2. Wang S, Dong YH, Wang ZH, et al. Trends in overweight and obesity among Chinese children of 7-18 years old during 1985-2014. *Zhonghua Yu Fang Yi Xue Za Zhi*, 2017, 51: 300-305.
3. Booth JN, Tomporowski PD, Boyle JM, et al. Obesity impairs academic attainment in adolescence: findings from ALSPAC, a UK cohort. *Int J Obes (Lond)*, 2014, 38: 1335-1342.
4. Pulgaron ER. Childhood obesity: a review of increased risk for physical and psychological comorbidities. *Clin Ther*, 2013, 35: A18-32.
5. Twig G, Yaniv G, Levine H, et al. Body-mass index in 2.3 million adolescents and cardiovascular death in adulthood. *N Engl J Med*, 2016, 374: 2430-2440.
6. Gunnell DJ, Frankel SJ, Nanchahal K, et al. Childhood obesity and adult cardiovascular mortality: a 57-year follow-up study based on the Boyd Orr cohort. *Am J Clin Nutr*, 1998, 136: 664-672.
7. Bleich SN, Vercammen KA, Zatz LY, et al. Interventions to prevent global childhood overweight and obesity: a systematic review. *Lancet Diabetes Endocrinol*, 2018, 6: 332-346.
8. Feng L, Wei D-M, Lin S-T, et al. Systematic review and meta-analysis of



- 1  
2  
3  
4 school-based obesity interventions in mainland China. PLoS One, 2017, 12:  
5  
6 e0184704-e0184704.  
7  
8
- 9 9. Li B, Liu WJ, Adab P, et al. Cluster-randomised controlled trial to assess the  
10  
11 effectiveness and cost-effectiveness of an obesity prevention programme for  
12  
13 Chinese primary school-aged children: the CHIRPY DRAGON study protocol.  
14  
15 BMJ Open, 2017, 7: e018415.  
16  
17
- 18  
19 10. Wang Z, Xu F, Ye Q, et al. Childhood obesity prevention through a community-  
20  
21 based cluster randomized controlled physical activity intervention among  
22  
23 schools in china: the health legacy project of the 2nd world summer youth  
24  
25 olympic Games (YOG-Obesity study). Int J Obes (Lond), 2018, 42: 625-633.  
26  
27
- 28  
29 11. Liu Z, Li Q, Maddison R, et al. A School-Based Comprehensive Intervention for  
30  
31 Childhood Obesity in China: A Cluster Randomized Controlled Trial. Child  
32  
33 Obes, 2019, 15(2): 105-15.  
34  
35
- 36  
37 12. JaKa MM, Haapala JL, Trapl ES, et al. Reporting of treatment fidelity in  
38  
39 behavioural paediatric obesity intervention trials: a systematic review. Obes  
40  
41 Rev, 2016, 17(12): 1287-300.  
42  
43
- 44  
45 13. Dong Y, Jan C, Ma Y, et al. Economic development and the nutritional status of  
46  
47 Chinese school-aged children and adolescents from 1995 to 2014: an analysis  
48  
49 of five successive national surveys. Lancet Diabetes Endocrinol, 2019, 7: 288-  
50  
51 299.  
52  
53
- 54  
55 14. Yao H, Zhu G, Zhang X, et al. Current situation and analysis of school  
56  
57 physicians in primary and secondary schools in 16 provinces in China. Chin J  
58  
59  
60

- Sch Health, 2018, 39(10): 1455-8.
15. Lin L, Li C, Gao A, et al. Effect of a comprehensive school-based intervention on childhood obesity. *Chin J Sch Health*, 2018, 39: 1505-1508.
16. Chan AW, Tetzlaff JM, Altman DG, et al. SPIRIT 2013 statement: defining standard protocol items for clinical trials. *Ann Intern Med*, 2013, 158: 200-207.
17. Chan AW, Tetzlaff JM, Gotzsche PC, et al. SPIRIT 2013 explanation and elaboration: guidance for protocols of clinical trials. *BMJ*, 2013, 346: e7586.
18. Sallis J, Owen N, Fisher E. *Ecological models of health behavior*, in *Health behavior and Health Education*, Glanz K, Rimer B, and Viswanath K, Editors. 2008, Jossey-Bass, A Wiley Imprint: San Francisco, CA. p. 465-485.
19. Martin J, Chater A, Lorencatto F. Effective behavior change techniques in the prevention and management of childhood obesity. *Int J Obes*, 2013, 37:1287-94.
20. Hunsberger M, O'Malley J, Block T, et al. Relative validation of Block Kids Food Screener for dietary assessment in children and adolescents. *Matern Child Nutr*, 2015, 11: 260-270.
21. Liu AL, Ma GS, Zhang Q, et al. Reliability and validity of a 7-day physical activity questionnaire for elementary students. [Article in Chinese]. *Zhonghua Liu Xing Bing Xue Za Zhi*, 2003, 24: 901-904.
22. Wardle J, Guthrie CA, Sanderson S, et al. Development of the Children's Eating Behaviour Questionnaire. *J Child Psychol Psychiatry*, 2001, 42: 963-970.
23. de Onis M, Onyango A, Borghi E, Siyam A, Nishida C, Siekmann J.

1  
2  
3  
4 Development of a WHO growth reference for school-aged children and  
5 adolescents. Bull World Health Organ, 2007, 85: 660-667.  
6  
7

- 8  
9 24. National Health Commission of the People's Republic of China. Screening for  
10 overweight and obesity among school-age children and adolescents (WS/T 586-  
11 2018). Beijing, China; 2018.  
12  
13  
14  
15  
16  
17 25. Saunders RP, Evans MH, and Joshi P. Developing a process-evaluation plan for  
18 assessing health promotion program implementation: a how-to guide. Health  
19 promotion practice, 2005, 6: 134-147.  
20  
21  
22  
23  
24  
25  
26  
27  
28  
29  
30  
31  
32  
33  
34  
35  
36  
37  
38  
39  
40  
41  
42  
43  
44  
45  
46  
47  
48  
49  
50  
51  
52  
53  
54  
55  
56  
57  
58  
59  
60

### **Authors' contributions**

HJW and YFW conceived the project. HJW, ZL, YFW, WYN and HJL were involved in design of the study and development of intervention materials. ZL wrote the first draft of the manuscript. XXF, YL, AYG and FZ contributed to implementation of the program. HF contributed to economic evaluation. PG contributed to statistical analysis plan. All authors approved the final manuscript.

For peer review only

## Acknowledgements

We thank Jun-Shi Chen, Li-Ming Wen, Jun Ma, Guan-Sheng Ma, Ke-Ji Li, Yan-Fang Wang, Zheng-Zhen Wang, Hong-Juan Li, Qian Zhang and Yao Zhao for their support and advice in the study design and intervention development. We also thank the children and their parents, school principals and teachers for their participation in the research. We thank China Mobile Research Institute for their help in development of the smartphone application.

### Study team of the DECIDE-Children study:

**Beijing:** Department of Maternal and Child Health, School of Public Health, Peking University (Hai-Jun Wang, Zheng Liu, Li-Zi Lin, Qiang Feng, Chen-Xiong Li, Shuang Zhou, Wen-Hao Li, Chu-Yao Jin, Qin Li, Yu Cheng, Di Wang, Lan Cheng, Yi Song, Hong Zhou, Xiang-Rong Xu, Jie-Yun Song); Dongcheng Primary and Secondary School Health Care Center, Beijing (Ai-Yu Gao, Hai-Hua Chen, Li-Jia Shang), Mentougou Primary and Secondary School Health Care Center, Beijing (Fang Zhang, Run-Ze Chen).

**Changzhi:** Changzhi Medical College (Xiang-Xian Feng, Jian-hui Yuan, Li-fen Duan).

**Urumqi:** Urumqi Primary and Secondary School Health Care Center, Xinjiang (Yi Lin, Chun-Xia Xu, Guo-Qin Yang, Zheng Zhang).

### Funding statement

This work was supported by National Key R&D Program of China (2016YFC1300200-4) and the China Postdoctoral Science Foundation (2019M650391).

1  
2  
3  
4 **Competing interests statement**  
5

6 None.  
7  
8  
9  
10  
11  
12  
13  
14  
15  
16  
17  
18  
19  
20  
21  
22  
23  
24  
25  
26  
27  
28  
29  
30  
31  
32  
33  
34  
35  
36  
37  
38  
39  
40  
41  
42  
43  
44  
45  
46  
47  
48  
49  
50  
51  
52  
53  
54  
55  
56  
57  
58  
59  
60

For peer review only

**Table 1 Description of the intervention components implemented in the DECIDE-children**

| <b>Intervention components</b>                  | <b>Descriptions on contents, frequency, and duration</b>                                                                                                                                                                                                                                                                                                                                                                                                                                                                                                                                                                                                                                                                                                                                                                                                                                                                                                                                                                                                                                                                                                                                                                                                                                                                                                                                                                    | <b>Responsible person</b>  |
|-------------------------------------------------|-----------------------------------------------------------------------------------------------------------------------------------------------------------------------------------------------------------------------------------------------------------------------------------------------------------------------------------------------------------------------------------------------------------------------------------------------------------------------------------------------------------------------------------------------------------------------------------------------------------------------------------------------------------------------------------------------------------------------------------------------------------------------------------------------------------------------------------------------------------------------------------------------------------------------------------------------------------------------------------------------------------------------------------------------------------------------------------------------------------------------------------------------------------------------------------------------------------------------------------------------------------------------------------------------------------------------------------------------------------------------------------------------------------------------------|----------------------------|
| <b>1. Student-focused activities</b>            |                                                                                                                                                                                                                                                                                                                                                                                                                                                                                                                                                                                                                                                                                                                                                                                                                                                                                                                                                                                                                                                                                                                                                                                                                                                                                                                                                                                                                             |                            |
| <b>Health education activities for students</b> | <p><u>1) Frequency and duration</u><br/>A total of ten activities (lasting for 40 minutes per activity) will be provided once every two to three weeks (six activities arranged in the first semester and four in the second semester).</p> <p><u>2) Different kinds of activities</u><br/>Ten activities will include seven health education lectures and three theme class meetings. The focus of health education lectures will be on information diffusion, while the focus of theme class meetings will be on consolidation of the key messages learned in health education lectures through interactive and interesting group work (e.g., “Let me guess”).</p> <p><u>3) Contents</u></p> <p>① Information diffusion<br/>Key messages will include the benefits of healthy weight, measurement and assessment of weight, as well as skills to achieve healthy weight (not eating excessively; not drinking sugar-sweetened beverage; eating less high-energy food; less sedentary behaviors; doing more physical activity). Health education books and “nutrition evaluation turnplate for Chinese primary and middle school students” will be delivered to students. Health education messages will be also spread through posters in campus or classroom.</p> <p>② Promotion for translating knowledge into action<br/>“Small hand in big hand” homework (e.g., “challenge of three days away from screen”) will</p> | The trained class teachers |

1  
2  
3  
4  
5  
6  
7  
8  
9  
10  
11  
12  
13  
14  
15  
16  
17  
18  
19  
20  
21  
22  
23  
24  
25  
26  
27  
28  
29  
30  
31  
32  
33  
34  
35  
36  
37  
38  
39  
40  
41  
42  
43  
44  
45  
46

|                                                                          |                                                                                                                                                                                                                                                                                                                                                                                                                                                                                                                                                                                                                                                                                                                                                                                                                                                                                                                                                                                                                         |                                                                                                                                                                                                                                                   |
|--------------------------------------------------------------------------|-------------------------------------------------------------------------------------------------------------------------------------------------------------------------------------------------------------------------------------------------------------------------------------------------------------------------------------------------------------------------------------------------------------------------------------------------------------------------------------------------------------------------------------------------------------------------------------------------------------------------------------------------------------------------------------------------------------------------------------------------------------------------------------------------------------------------------------------------------------------------------------------------------------------------------------------------------------------------------------------------------------------------|---------------------------------------------------------------------------------------------------------------------------------------------------------------------------------------------------------------------------------------------------|
|                                                                          | <p>be arranged at the end of each health education activity.</p> <p>③ Feedback and encouragement for BMI and behavior change</p> <p>Feedback of regular monitoring results of students' BMI and behaviors will be provided in each health education activity. The students with good performance will be encouraged.</p>                                                                                                                                                                                                                                                                                                                                                                                                                                                                                                                                                                                                                                                                                                |                                                                                                                                                                                                                                                   |
| <p><b>Reinforcement of students' physical activity within school</b></p> | <p>1) Students will be organized by physical education teachers to do physical activity within school for at least one hour per school day (including physical education classes, class-break exercise, extracurricular activities), achieving moderate-to-vigorous intensity. The aim of this component will be to improve the implementation of the Chinese national requirement for 'One-Hour Physical Activity On Campus Every School Day'. If schools have met this requirement, no extra physical activities will be added within school; if not, extra physical activities (i.e. physical education classes, class-break exercise or extracurricular activities) will be additionally added to the school schedule. Monitoring of implementation of these extra physical activities will be continuous within the intervention period for these intervention schools;</p> <p>2) Physical education teachers will be advised to teach students at least one sports game during each extracurricular activity.</p> | <p>The trained physical education teachers</p>                                                                                                                                                                                                    |
| <p><b>Regular monitoring of students' weight and height</b></p>          | <p><u>1) Monthly monitoring</u></p> <p>Students' weight and height will be monitored monthly, the data will be then timely input into the computer management system and thus being shown in the smartphone app (described below);</p> <p><u>2) Weekly monitoring</u></p> <p>Students' weight will be monitored weekly by the students themselves in the classroom.</p>                                                                                                                                                                                                                                                                                                                                                                                                                                                                                                                                                                                                                                                 | <p>The trained school doctors/health care teachers with the assistance of the trained project staff (for monthly monitoring);</p> <p>The trained project staff (for data input of monthly monitoring)</p> <p>Students (for weekly monitoring)</p> |



1  
2  
3  
4  
5  
6  
7  
8  
9  
10  
11  
12  
13  
14  
15  
16  
17  
18  
19  
20  
21  
22  
23  
24  
25  
26  
27  
28  
29  
30  
31  
32  
33  
34  
35  
36  
37  
38  
39  
40  
41  
42  
43  
44  
45  
46

|                                                                                  |                                                                                                                                                                                                                                                                                                                                                                                                                                                                                                                                                                                                                                                                                                                                                                                                                                      |                                                                |
|----------------------------------------------------------------------------------|--------------------------------------------------------------------------------------------------------------------------------------------------------------------------------------------------------------------------------------------------------------------------------------------------------------------------------------------------------------------------------------------------------------------------------------------------------------------------------------------------------------------------------------------------------------------------------------------------------------------------------------------------------------------------------------------------------------------------------------------------------------------------------------------------------------------------------------|----------------------------------------------------------------|
| <b>2. Activities towards parents (providing a supportive family environment)</b> |                                                                                                                                                                                                                                                                                                                                                                                                                                                                                                                                                                                                                                                                                                                                                                                                                                      |                                                                |
| <b>Health education activities for parents</b>                                   | <p><u>1) Frequency and duration</u><br/>At least one activity (lasting for about 40-60 minutes) will be held at the beginning of each semester. One more activity will be held in the middle of the first semester. Another activity will also be held in the middle of the second semester if necessary (such as fidelity is unsatisfactory).</p> <p><u>2) Contents</u></p> <ul style="list-style-type: none"> <li>➤ For the first activity<br/>Key messages will be similar to health education activities for students (described above). Parents will also be taught to use the smartphone app.</li> <li>➤ For other activities<br/>Project staff will provide feedback about students' weight status and behaviors to parents. Face-to-face group discussions will be established between project staff and parents.</li> </ul> | The trained project staff                                      |
| <b>Reinforcement of students' physical activity outside school</b>               | <ul style="list-style-type: none"> <li>1) Parents will be instructed to supervise and encourage students to do physical activity outside school, achieving 30 minutes per weekday and 1 hour per weekend day;</li> <li>2) Recommendations for physical activity outside school will be provided through the smartphone app once every two months;</li> <li>3) Students will be encouraged to do sports games outside school that will be taught by their physical education teachers during extracurricular activities.</li> </ul>                                                                                                                                                                                                                                                                                                   | Students' parents                                              |
| <b>3. Activities towards schools (providing a supportive school environment)</b> |                                                                                                                                                                                                                                                                                                                                                                                                                                                                                                                                                                                                                                                                                                                                                                                                                                      |                                                                |
| <b>School policies related to obesity prevention</b>                             | <p>The following school policies will be suggested:</p> <ul style="list-style-type: none"> <li>1) "Not selling":</li> </ul>                                                                                                                                                                                                                                                                                                                                                                                                                                                                                                                                                                                                                                                                                                          | <p>Trained school principal;</p> <p>Trained class teachers</p> |

|                                                                                  |                                                                                                                                                                                                                                                                                                                                                                                                                                                                                                                                                          |                                                                                                                 |
|----------------------------------------------------------------------------------|----------------------------------------------------------------------------------------------------------------------------------------------------------------------------------------------------------------------------------------------------------------------------------------------------------------------------------------------------------------------------------------------------------------------------------------------------------------------------------------------------------------------------------------------------------|-----------------------------------------------------------------------------------------------------------------|
|                                                                                  | <p>Not selling unhealthy snacks<sup>1</sup> or sugar-sweetened beverages within school;</p> <p>2) “Not eating”:<br/>Telling students not to eat unhealthy snacks or drink sugar-sweetened beverages within school;</p> <p>3) “Not buying”:<br/>Students being educated by class teachers not to buy unhealthy snacks or sugar-sweetened beverages around school.</p>                                                                                                                                                                                     |                                                                                                                 |
| <p><b>Health education activities for school teachers</b></p>                    | <p><u>1) Frequency and duration</u><br/>The activity will be held once (lasting for about 40 minutes) in the first month of the intervention. School teachers participating in this program in each school (school principal, class teachers, school doctors/health care teachers and physical education teachers) will be required to attend the activity.</p> <p><u>2) Contents</u><br/>Key messages will be similar to health education activities for students (described above). School teachers will also be taught to use the smartphone app.</p> | The trained project staff                                                                                       |
| <p><b>4. A smartphone app assisted in implementation of the intervention</b></p> |                                                                                                                                                                                                                                                                                                                                                                                                                                                                                                                                                          |                                                                                                                 |
| <p>The smartphone app (“Eat Wisely, Move Happily”)</p>                           | <p><u>1) Information diffusion (the behavior change technique (BCT) used: providing information on consequences of behavior)</u><br/>The smartphone app will provide information to parents, class teachers and project staff in</p>                                                                                                                                                                                                                                                                                                                     | <p>The smartphone app (installed by parents, school teachers and project staff) and the computer management</p> |

<sup>1</sup> “Healthy snacks” refer to dairy products, fresh vegetables or fruits and natural unprocessed nuts which are eaten at times other than at main meals. “Unhealthy snacks” refer to snacks other than the three kinds of healthy snacks.

1  
2  
3  
4  
5  
6  
7  
8  
9  
10  
11  
12  
13  
14  
15  
16  
17  
18  
19  
20  
21  
22  
23  
24  
25  
26  
27  
28  
29  
30  
31  
32  
33  
34  
35  
36  
37  
38  
39  
40  
41  
42  
43  
44  
45  
46

|  |                                                                                                                                                                                                                                                                                                                                                                                                                                                                                                                                                                                                                                                                                                                                                                                                                                                                                                                                                                                                                                                                                                                                                                         |                                           |
|--|-------------------------------------------------------------------------------------------------------------------------------------------------------------------------------------------------------------------------------------------------------------------------------------------------------------------------------------------------------------------------------------------------------------------------------------------------------------------------------------------------------------------------------------------------------------------------------------------------------------------------------------------------------------------------------------------------------------------------------------------------------------------------------------------------------------------------------------------------------------------------------------------------------------------------------------------------------------------------------------------------------------------------------------------------------------------------------------------------------------------------------------------------------------------------|-------------------------------------------|
|  | <p>accordance with health education activities.</p> <p><u>2) Behavior monitoring (the BCT used: prompting self-monitoring of behavior)</u></p> <p>Parents together with their children will be asked to weekly record diet and physical activity behaviors of students in the app, and then they will receive individualized feedback related to these behaviors (described in Table 2).</p> <p><u>3) Weight management (the BCT used: prompting self-monitoring)</u></p> <p>According to monthly monitoring of students' weight and height (described above), parents, school teachers and project staff will view the recent weight status (categorized according to the BMI percentile criteria [24]), changes compared with previous records of the students as well as the individualized feedback related to weight management (described in Table 2).</p> <p><u>4) Assessment and feedback (the BCT used: providing feedback on performance)</u></p> <p>The smartphone app will also provide a synthetic and individualized assessment that will combine changes of behaviors and weight status of students. Four kinds of feedback are provided in Table 2.</p> | <p>system (utilized by project staff)</p> |
|--|-------------------------------------------------------------------------------------------------------------------------------------------------------------------------------------------------------------------------------------------------------------------------------------------------------------------------------------------------------------------------------------------------------------------------------------------------------------------------------------------------------------------------------------------------------------------------------------------------------------------------------------------------------------------------------------------------------------------------------------------------------------------------------------------------------------------------------------------------------------------------------------------------------------------------------------------------------------------------------------------------------------------------------------------------------------------------------------------------------------------------------------------------------------------------|-------------------------------------------|

**Table 2 The four kinds of regular evaluation messages feedback to all stakeholders by the smartphone mobile app on the basis of data from regular monitoring of children's weight, height and behaviors**

|                                                                                                          |                               | Results automatically judged according to height and weight measured at regular monitoring                                                                                      |                                                                                                                                                                                                                                                                                                 |
|----------------------------------------------------------------------------------------------------------|-------------------------------|---------------------------------------------------------------------------------------------------------------------------------------------------------------------------------|-------------------------------------------------------------------------------------------------------------------------------------------------------------------------------------------------------------------------------------------------------------------------------------------------|
|                                                                                                          |                               | Positive results<br>(BMI decreases in students who are overweight or obese, or BMI increases in students who are underweight)                                                   | Negative results<br>(BMI increases in students who are overweight or obese, or BMI decreases in who are underweight)                                                                                                                                                                            |
| <b>Results automatically judged according to diet and physical activity behaviors recorded regularly</b> | Full marks/<br>getting better | <b>Feedback 1:</b> "Your child is doing a great job. The weight changes are consistent with changes in diet and physical activity behavior. Keep it up!"                        | <b>Feedback 2:</b> "Your child's weight has not improved, but diet and physical activity behavior is good. It might be that weight improvement requires a long-term adherence to a reasonable diet and physical activity, or that behavior records are inaccurate. Please continue to improve!" |
|                                                                                                          | Unchanged/<br>getting worse   | <b>Feedback 3:</b> "Your child has improved or maintained a healthy body weight, but there is still room for improvement in diet and physical activity behavior. Keep working!" | <b>Feedback 4:</b> "Your child's weight has not improved, and diet and physical activity also need improvement. Please continue to work hard!"                                                                                                                                                  |

Table 3 Outcome measurements for the DECIDE-Children

| Outcomes                               | Time     |                         |                         |                          | Device (Manufacturer, model)                                                                                 | Method                                        |
|----------------------------------------|----------|-------------------------|-------------------------|--------------------------|--------------------------------------------------------------------------------------------------------------|-----------------------------------------------|
|                                        | Baseline | 4 months after baseline | 9 months after baseline | 21 months after baseline |                                                                                                              |                                               |
| <b>Anthropometric measures</b>         |          |                         |                         |                          |                                                                                                              |                                               |
| Height                                 | √        | √                       | √                       | √                        | Stadiometer (Huateng GMCS-1)                                                                                 | Measured to the nearest 0.1 cm at least twice |
| Weight                                 | √        | √                       | √                       | √                        | Lever scale (Wujin RGT-140)                                                                                  | Measured to the nearest 0.1 kg at least twice |
| Waist circumference                    | √        | √                       | √                       | √                        | Tape (MyoTape)                                                                                               | Measured to the nearest 0.1 cm at least twice |
| Hip circumference                      | √        | √                       | √                       | √                        | Tape (MyoTape)                                                                                               | Measured to the nearest 0.1 cm at least twice |
| Systolic and diastolic blood pressures | √        | √                       | √                       | √                        | Electronic sphygmomanometer (Omron HBP-1300)                                                                 | Measured to the nearest 1 mmHg at least twice |
| Body fat percentage                    | √        |                         | √                       |                          | Body component instrument (Tanita MC-780MA)                                                                  | According to the standard procedure           |
| <b>Physical fitness measures</b>       |          |                         |                         |                          |                                                                                                              |                                               |
| One-minute rope jumping                | √        |                         | √                       |                          | Physical fitness measures will be assessed by trained outcome assessors according to the standard procedure. |                                               |

|    |                                      |   |                                                                                  |
|----|--------------------------------------|---|----------------------------------------------------------------------------------|
| 1  |                                      |   |                                                                                  |
| 2  |                                      |   |                                                                                  |
| 3  |                                      |   |                                                                                  |
| 4  |                                      |   |                                                                                  |
| 5  | One-minute sit-up                    | √ | √                                                                                |
| 6  |                                      |   |                                                                                  |
| 7  | Long standing jump                   | √ | √                                                                                |
| 8  |                                      |   |                                                                                  |
| 9  | Shuttle run (50m×8)                  | √ | √                                                                                |
| 10 |                                      |   |                                                                                  |
| 11 |                                      |   |                                                                                  |
| 12 | <b>Behavioral and other measures</b> |   |                                                                                  |
| 13 |                                      |   |                                                                                  |
| 14 |                                      |   |                                                                                  |
| 15 |                                      |   | We will use 8 items to assess the change of students' knowledge related to       |
| 16 | Students' knowledge                  |   | energy balance. For example, we will ask students, "Is it right that drinking    |
| 17 | related to energy                    | √ | sugar-sweetened beverage cannot substitute drinking water." Three choices        |
| 18 | balance                              |   | will be provided (Right; Wrong; Not clear).                                      |
| 19 |                                      |   | Students should finish the questionnaires in the classroom in the presence of    |
| 20 |                                      |   | the trained outcome assessors, who can provide guidance and help.                |
| 21 |                                      |   | Questions were designed based on a validated 7-day physical activity             |
| 22 |                                      |   | questionnaire (PAQ; kappa values for test-retest results: 0.46~0.79 (different   |
| 23 |                                      |   | measures of activity)); face validity and content validity were good by experts' |
| 24 | Students' duration of                |   | evaluation; correlations between PAQ and Caltrac motion sensor ranging from      |
| 25 | moderate-to-vigorous                 | √ | 0.38 to 0.46 (different measures of activity) for boys) [21].                    |
| 26 | physical activity                    |   | Students should finish the questionnaires in the classroom in the presence of    |
| 27 |                                      |   | the trained outcome assessors, who can provide guidance and help.                |
| 28 |                                      |   | We will use a "Children Eating Behavior Questionnaire" (CEBQ) to assess          |
| 29 | Students' eating                     |   | students' eating behaviors, including responsiveness to food, enjoyment of       |
| 30 | behavior                             | √ | food etc. This 35-item instrument has been shown relatively good reliability     |
| 31 |                                      |   | [22].                                                                            |
| 32 |                                      |   |                                                                                  |
| 33 |                                      |   |                                                                                  |
| 34 |                                      |   |                                                                                  |
| 35 |                                      |   |                                                                                  |
| 36 |                                      |   |                                                                                  |
| 37 |                                      |   |                                                                                  |
| 38 |                                      |   |                                                                                  |
| 39 |                                      |   |                                                                                  |
| 40 |                                      |   |                                                                                  |
| 41 |                                      |   |                                                                                  |
| 42 |                                      |   |                                                                                  |
| 43 |                                      |   |                                                                                  |
| 44 |                                      |   |                                                                                  |
| 45 |                                      |   |                                                                                  |
| 46 |                                      |   |                                                                                  |

1  
2  
3  
4  
5  
6  
7  
8  
9  
10  
11  
12  
13  
14  
15  
16  
17  
18  
19  
20  
21  
22  
23  
24  
25  
26  
27  
28  
29  
30  
31  
32  
33  
34  
35  
36  
37  
38  
39  
40  
41  
42  
43  
44  
45  
46

---

|                                                                     |   |   |                                                                                                                                                                                                                                                                                                                                                                                                                                                                                                                                       |
|---------------------------------------------------------------------|---|---|---------------------------------------------------------------------------------------------------------------------------------------------------------------------------------------------------------------------------------------------------------------------------------------------------------------------------------------------------------------------------------------------------------------------------------------------------------------------------------------------------------------------------------------|
| Students' sedentary behavior                                        | √ | √ | The questionnaires should be self-reported by parents or other primary caregivers of students.                                                                                                                                                                                                                                                                                                                                                                                                                                        |
| School policies for prevention and management of childhood obesity) | √ | √ | We will use a self-designed questionnaire to ask the average duration of doing homework, watching television and playing electronic devices per day during the last week, respectively.<br>Students should finish the questionnaires in the classroom in the presence of the trained outcome assessors, who can provide guidance and help.<br>The questionnaires should be filled in by the trained investigators after face-to-face interviews with school principals, doctors/health care teachers and physical education teachers. |
| Stage of change related to weight reduction behavior                | √ | √ | We will use two items to assess it. First, we will ask "Have you taken action to reduce your weight during the last three months?" Yes/no choices will be provided. And then, we will ask "Do you intend to reduce your weight currently?" This item will be provided 5 choices from "completely not intend" to "intend very much".<br>Students should finish the questionnaires in the classroom in the presence of the trained outcome assessors, who can provide guidance and help.                                                |

---

1  
2  
3  
4 Figure 1 Study flow chart of the DECIDE-children  
5

6  
7 Figure 2 Social Ecological Model of the DECIDE-children  
8  
9  
10  
11  
12  
13  
14  
15  
16  
17  
18  
19  
20  
21  
22  
23  
24  
25  
26  
27  
28  
29  
30  
31  
32  
33  
34  
35  
36  
37  
38  
39  
40  
41  
42  
43  
44  
45  
46  
47  
48  
49  
50  
51  
52  
53  
54  
55  
56  
57  
58  
59  
60

For peer review only



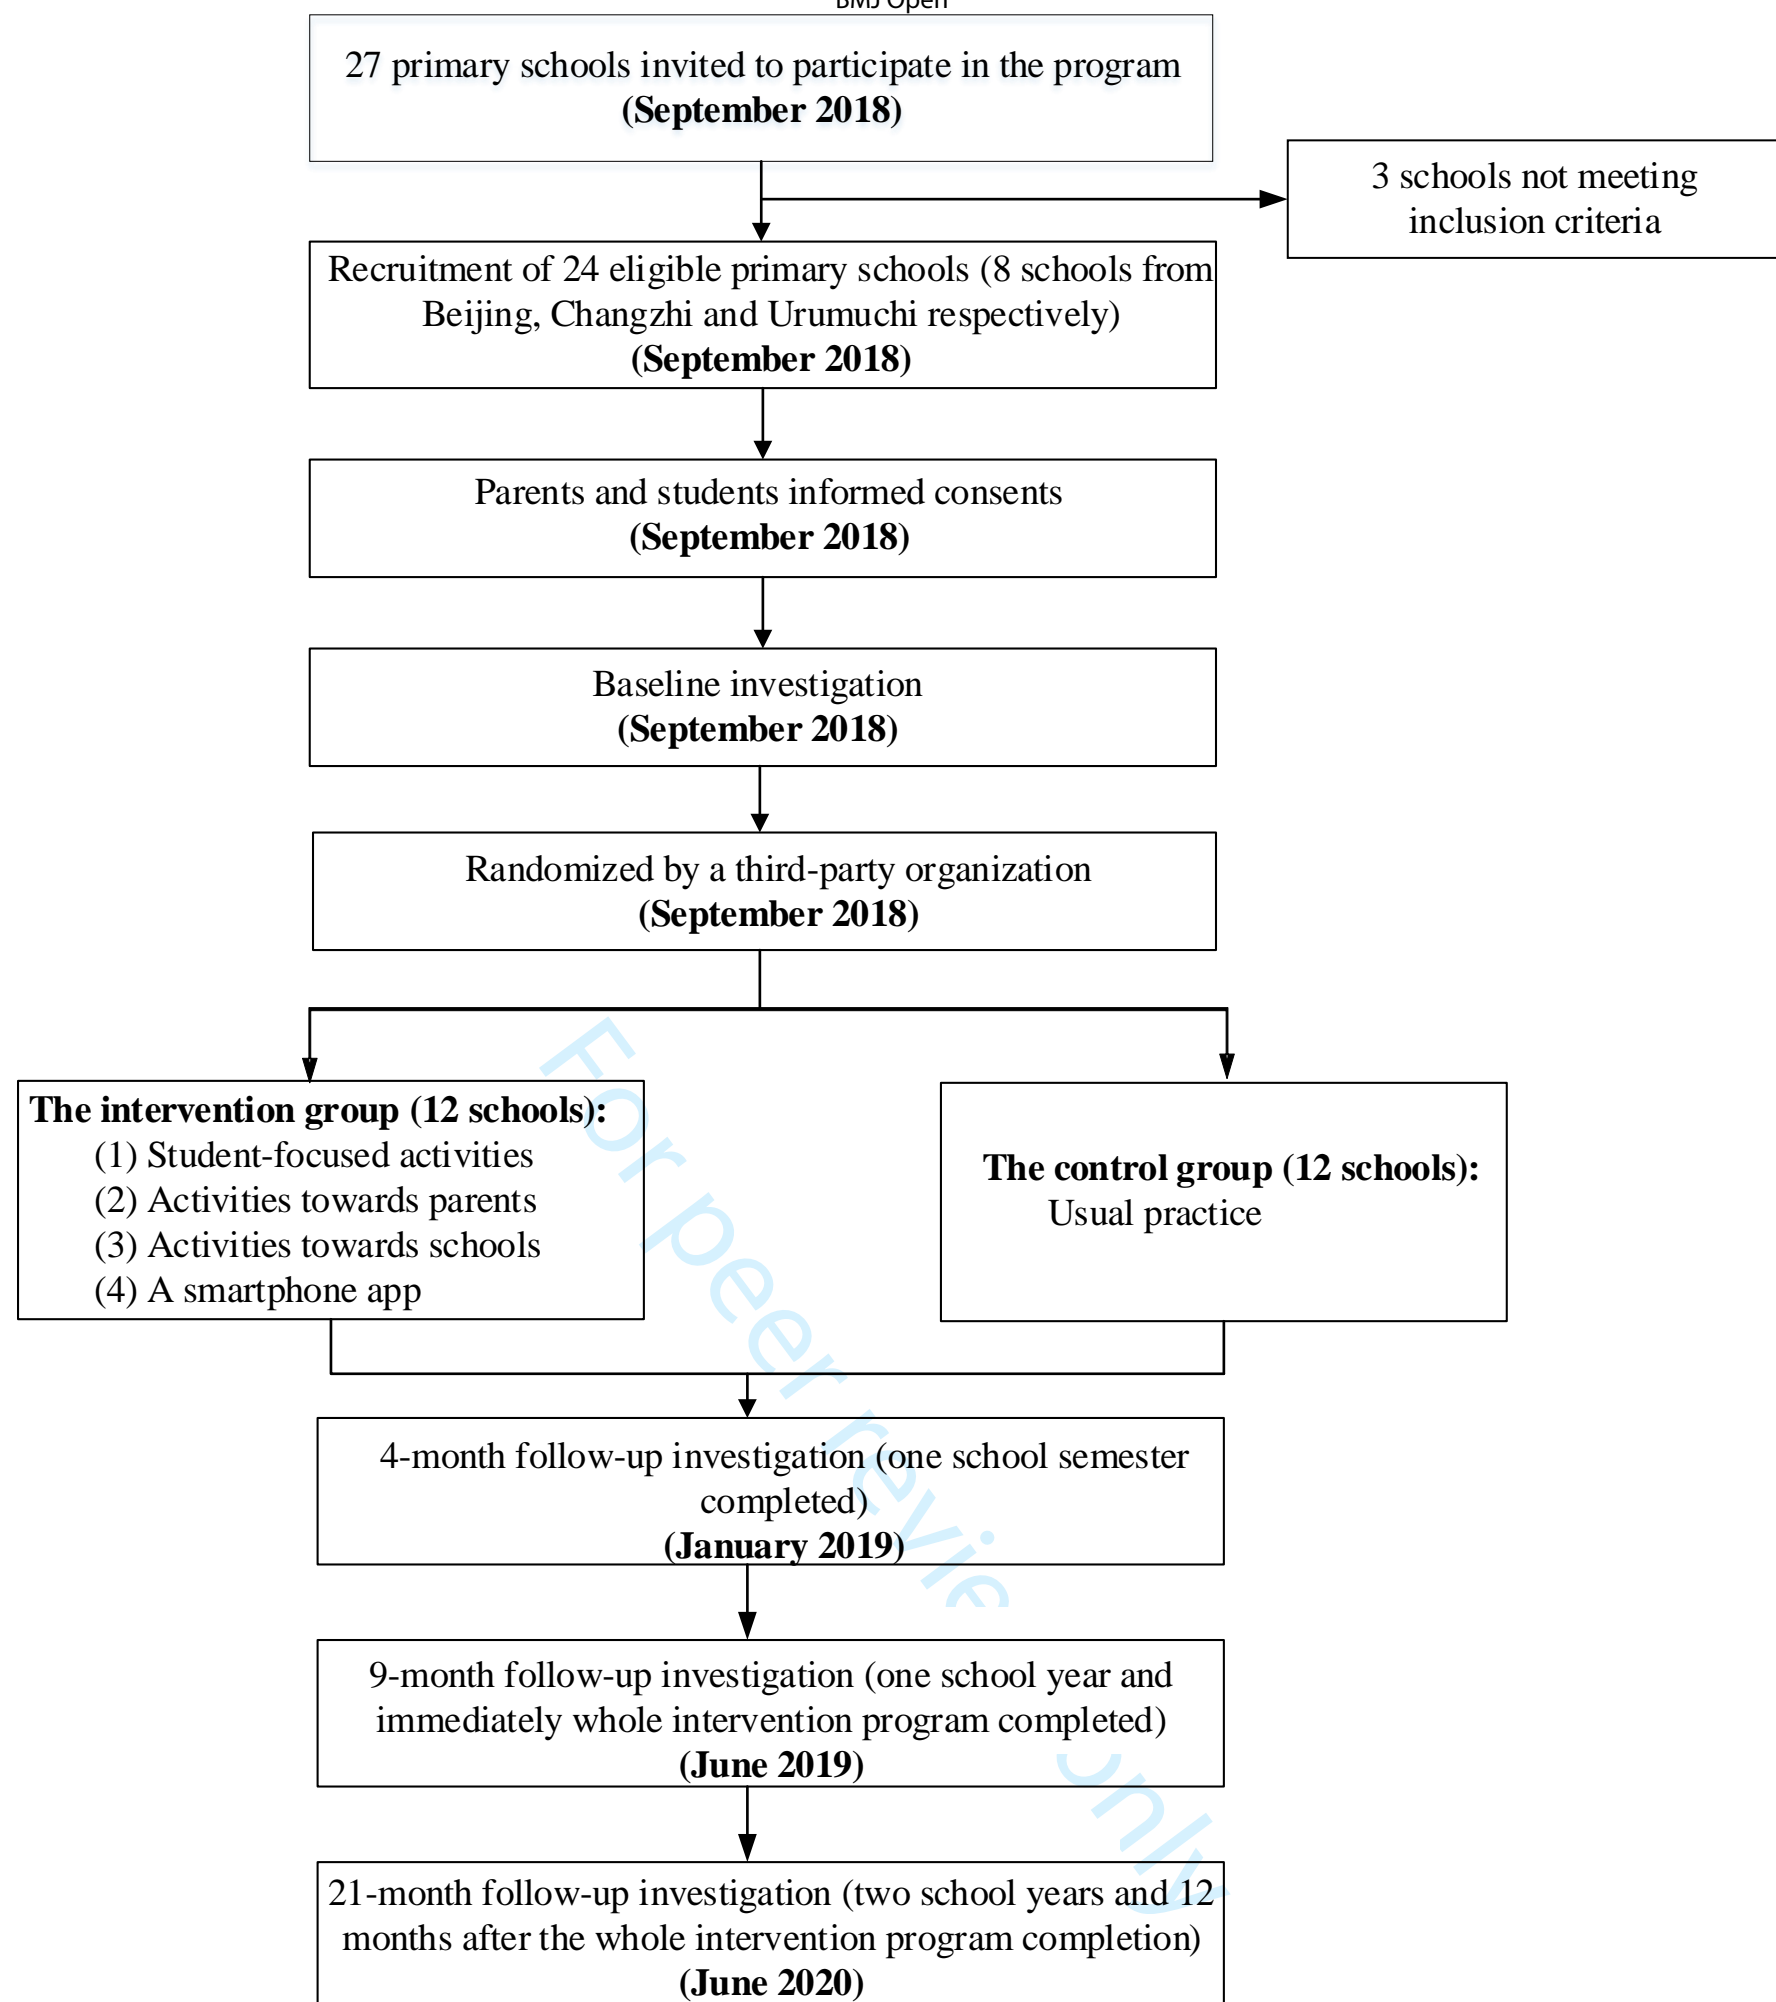

**Figure 1** Study flow chart of the DECIDE-children

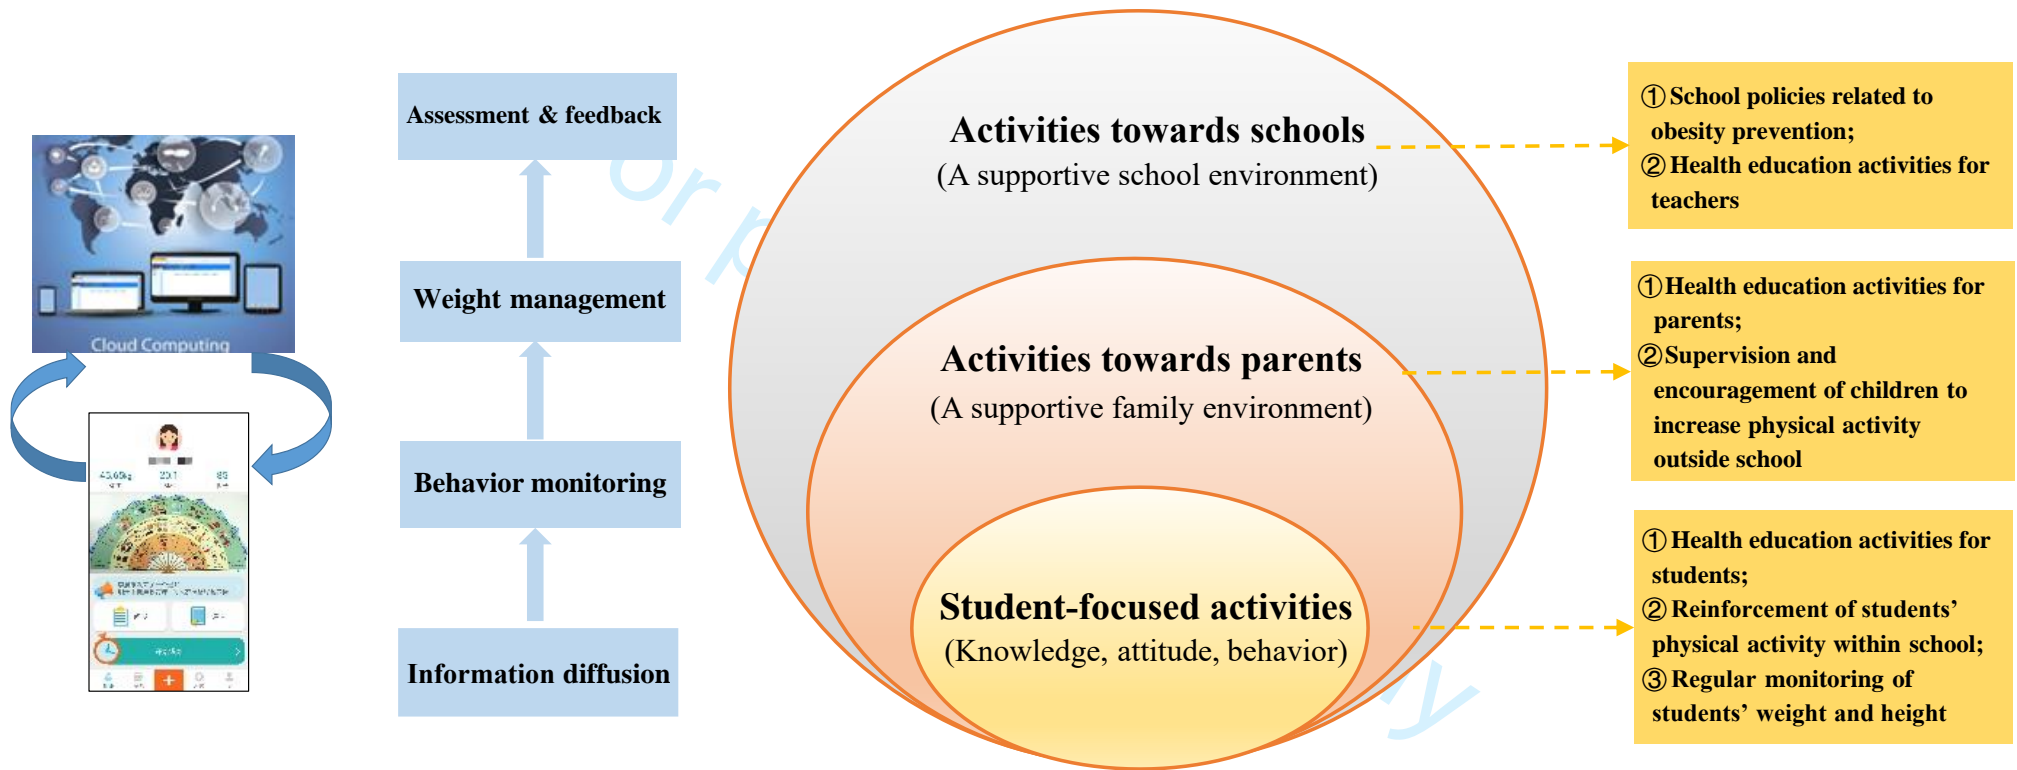

Figure 2 Social Ecological Model of the DECIDE-children

# Reporting checklist for protocol of a clinical trial.

Based on the SPIRIT guidelines.

## Instructions to authors

Complete this checklist by entering the page numbers from your manuscript where readers will find each of the items listed below.

Your article may not currently address all the items on the checklist. Please modify your text to include the missing information. If you are certain that an item does not apply, please write "n/a" and provide a short explanation.

Upload your completed checklist as an extra file when you submit to a journal.

In your methods section, say that you used the SPIRIT reporting guidelines, and cite them as:

Chan A-W, Tetzlaff JM, Altman DG, Laupacis A, Gøtzsche PC, Krleža-Jerić K, Hróbjartsson A, Mann H, Dickersin K, Berlin J, Doré C, Parulekar W, Summerskill W, Groves T, Schulz K, Sox H, Rockhold FW, Rennie D, Moher D. SPIRIT 2013 Statement: Defining standard protocol items for clinical trials. *Ann Intern Med.* 2013;158(3):200-207

|                    |                     | Reporting Item                                                                                               | Page Number |
|--------------------|---------------------|--------------------------------------------------------------------------------------------------------------|-------------|
| Title              | <a href="#">#1</a>  | Descriptive title identifying the study design, population, interventions, and, if applicable, trial acronym | 1           |
| Trial registration | <a href="#">#2a</a> | Trial identifier and registry name. If not yet registered, name of intended registry                         | 3           |

|                                                                                              |                                                            |                     |                                                                                                                                                                                 |                                                                                                                                    |
|----------------------------------------------------------------------------------------------|------------------------------------------------------------|---------------------|---------------------------------------------------------------------------------------------------------------------------------------------------------------------------------|------------------------------------------------------------------------------------------------------------------------------------|
| 1<br>2<br>3<br>4<br>5<br>6<br>7                                                              | Trial registration:<br>data set                            | <a href="#">#2b</a> | All items from the World Health Organization Trial Registration Data Set                                                                                                        | This information is provided in the trial registration website.                                                                    |
| 8<br>9<br>10<br>11<br>12<br>13<br>14<br>15<br>16<br>17                                       | Protocol version                                           | <a href="#">#3</a>  | Date and version identifier                                                                                                                                                     | This information will be provided as soon as the manuscript revision is finally completed.                                         |
| 18<br>19<br>20<br>21<br>22<br>23                                                             | Funding                                                    | <a href="#">#4</a>  | Sources and types of financial, material, and other support                                                                                                                     | 25                                                                                                                                 |
| 24<br>25<br>26<br>27<br>28<br>29<br>30                                                       | Roles and responsibilities:<br>contributorship             | <a href="#">#5a</a> | Names, affiliations, and roles of protocol contributors                                                                                                                         | 24-25                                                                                                                              |
| 31<br>32<br>33<br>34<br>35<br>36<br>37<br>38<br>39<br>40<br>41<br>42<br>43<br>44<br>45<br>46 | Roles and responsibilities:<br>sponsor contact information | <a href="#">#5b</a> | Name and contact information for the trial sponsor                                                                                                                              | n/a.<br><br>This study was not sponsored by any individuals or companies. The funder name and number has been provided in Page 25. |
| 47<br>48<br>49<br>50<br>51<br>52<br>53<br>54<br>55<br>56<br>57<br>58<br>59<br>60             | Roles and responsibilities:<br>sponsor and funder          | <a href="#">#5c</a> | Role of study sponsor and funders, if any, in study design; collection, management, analysis, and interpretation of data; writing of the report; and the decision to submit the | 26                                                                                                                                 |

|    |                   |                     |                                             |     |
|----|-------------------|---------------------|---------------------------------------------|-----|
| 1  |                   |                     | report for publication, including whether   |     |
| 2  |                   |                     | they will have ultimate authority over      |     |
| 3  |                   |                     | any of these activities                     |     |
| 4  |                   |                     |                                             |     |
| 5  |                   |                     |                                             |     |
| 6  |                   |                     |                                             |     |
| 7  |                   |                     |                                             |     |
| 8  | Roles and         | <a href="#">#5d</a> | Composition, roles, and responsibilities    | 25  |
| 9  | responsibilities: |                     | of the coordinating centre, steering        |     |
| 10 |                   |                     | committee, endpoint adjudication            |     |
| 11 | committees        |                     | committee, data management team,            |     |
| 12 |                   |                     | and other individuals or groups             |     |
| 13 |                   |                     | overseeing the trial, if applicable (see    |     |
| 14 |                   |                     | Item 21a for data monitoring committee)     |     |
| 15 |                   |                     |                                             |     |
| 16 |                   |                     |                                             |     |
| 17 |                   |                     |                                             |     |
| 18 |                   |                     |                                             |     |
| 19 |                   |                     |                                             |     |
| 20 |                   |                     |                                             |     |
| 21 |                   |                     |                                             |     |
| 22 |                   |                     |                                             |     |
| 23 |                   |                     |                                             |     |
| 24 | Background and    | <a href="#">#6a</a> | Description of research question and        | 5-7 |
| 25 | rationale         |                     | justification for undertaking the trial,    |     |
| 26 |                   |                     | including summary of relevant studies       |     |
| 27 |                   |                     | (published and unpublished) examining       |     |
| 28 |                   |                     | benefits and harms for each intervention    |     |
| 29 |                   |                     |                                             |     |
| 30 |                   |                     |                                             |     |
| 31 |                   |                     |                                             |     |
| 32 |                   |                     |                                             |     |
| 33 |                   |                     |                                             |     |
| 34 |                   |                     |                                             |     |
| 35 |                   |                     |                                             |     |
| 36 |                   |                     |                                             |     |
| 37 | Background and    | <a href="#">#6b</a> | Explanation for choice of comparators       | 6   |
| 38 | rationale: choice |                     |                                             |     |
| 39 |                   |                     |                                             |     |
| 40 | of comparators    |                     |                                             |     |
| 41 |                   |                     |                                             |     |
| 42 |                   |                     |                                             |     |
| 43 |                   |                     |                                             |     |
| 44 | Objectives        | <a href="#">#7</a>  | Specific objectives or hypotheses           | 7   |
| 45 |                   |                     |                                             |     |
| 46 |                   |                     |                                             |     |
| 47 | Trial design      | <a href="#">#8</a>  | Description of trial design including type  | 8   |
| 48 |                   |                     | of trial (eg, parallel group, crossover,    |     |
| 49 |                   |                     | factorial, single group), allocation ratio, |     |
| 50 |                   |                     | and framework (eg, superiority,             |     |
| 51 |                   |                     | equivalence, non-inferiority, exploratory)  |     |
| 52 |                   |                     |                                             |     |
| 53 |                   |                     |                                             |     |
| 54 |                   |                     |                                             |     |
| 55 |                   |                     |                                             |     |
| 56 |                   |                     |                                             |     |
| 57 |                   |                     |                                             |     |
| 58 |                   |                     |                                             |     |
| 59 |                   |                     |                                             |     |
| 60 |                   |                     |                                             |     |

|                                                                                                                                                          |                              |                      |                                                                                                                                                                                                  |                                                                                                                                                                                                                              |
|----------------------------------------------------------------------------------------------------------------------------------------------------------|------------------------------|----------------------|--------------------------------------------------------------------------------------------------------------------------------------------------------------------------------------------------|------------------------------------------------------------------------------------------------------------------------------------------------------------------------------------------------------------------------------|
| 1<br>2<br>3<br>4<br>5<br>6<br>7<br>8<br>9<br>10<br>11<br>12                                                                                              | Study setting                | <a href="#">#9</a>   | Description of study settings (eg, community clinic, academic hospital) and list of countries where data will be collected. Reference to where list of study sites can be obtained               | 8                                                                                                                                                                                                                            |
| 13<br>14<br>15<br>16<br>17<br>18<br>19<br>20<br>21<br>22<br>23<br>24                                                                                     | Eligibility criteria         | <a href="#">#10</a>  | Inclusion and exclusion criteria for participants. If applicable, eligibility criteria for study centres and individuals who will perform the interventions (eg, surgeons, psychotherapists)     | 9-10                                                                                                                                                                                                                         |
| 25<br>26<br>27<br>28<br>29<br>30<br>31<br>32<br>33<br>34                                                                                                 | Interventions: description   | <a href="#">#11a</a> | Interventions for each group with sufficient detail to allow replication, including how and when they will be administered                                                                       | 11, Table 1-2                                                                                                                                                                                                                |
| 35<br>36<br>37<br>38<br>39<br>40<br>41<br>42<br>43<br>44<br>45<br>46<br>47<br>48<br>49<br>50<br>51<br>52<br>53<br>54<br>55<br>56<br>57<br>58<br>59<br>60 | Interventions: modifications | <a href="#">#11b</a> | Criteria for discontinuing or modifying allocated interventions for a given trial participant (eg, drug dose change in response to harms, participant request, or improving / worsening disease) | n/a.<br><br>This is a childhood obesity prevention intervention. Based on our previous experiences, it is less likely that discontinuing or modifying allocated interventions for a given trial participant will take place. |

|    |                  |                      |                                            |                                |
|----|------------------|----------------------|--------------------------------------------|--------------------------------|
| 1  | Interventions:   | <a href="#">#11c</a> | Strategies to improve adherence to         | 11-12                          |
| 2  |                  |                      |                                            |                                |
| 3  | adherence        |                      | intervention protocols, and any            |                                |
| 4  |                  |                      |                                            |                                |
| 5  |                  |                      | procedures for monitoring adherence        |                                |
| 6  |                  |                      |                                            |                                |
| 7  |                  |                      | (eg, drug tablet return; laboratory tests) |                                |
| 8  |                  |                      |                                            |                                |
| 9  |                  |                      |                                            |                                |
| 10 |                  |                      |                                            |                                |
| 11 | Interventions:   | <a href="#">#11d</a> | Relevant concomitant care and              | n/a.                           |
| 12 |                  |                      |                                            |                                |
| 13 | concomitant care |                      | interventions that are permitted or        | This is a childhood obesity    |
| 14 |                  |                      |                                            | prevention intervention.       |
| 15 |                  |                      | prohibited during the trial                | Based on our previous          |
| 16 |                  |                      |                                            | experiences, it is less likely |
| 17 |                  |                      |                                            | that concomitant care and      |
| 18 |                  |                      |                                            | interventions will take place. |
| 19 |                  |                      |                                            |                                |
| 20 |                  |                      |                                            |                                |
| 21 |                  |                      |                                            |                                |
| 22 |                  |                      |                                            |                                |
| 23 |                  |                      |                                            |                                |
| 24 |                  |                      |                                            |                                |
| 25 |                  |                      |                                            |                                |
| 26 |                  |                      |                                            |                                |
| 27 |                  |                      |                                            |                                |
| 28 | Outcomes         | <a href="#">#12</a>  | Primary, secondary, and other              | 13-14, Table 3                 |
| 29 |                  |                      |                                            |                                |
| 30 |                  |                      | outcomes, including the specific           |                                |
| 31 |                  |                      |                                            |                                |
| 32 |                  |                      | measurement variable (eg, systolic         |                                |
| 33 |                  |                      |                                            |                                |
| 34 |                  |                      | blood pressure), analysis metric (eg,      |                                |
| 35 |                  |                      |                                            |                                |
| 36 |                  |                      | change from baseline, final value, time    |                                |
| 37 |                  |                      |                                            |                                |
| 38 |                  |                      | to event), method of aggregation (eg,      |                                |
| 39 |                  |                      |                                            |                                |
| 40 |                  |                      | median, proportion), and time point for    |                                |
| 41 |                  |                      |                                            |                                |
| 42 |                  |                      | each outcome. Explanation of the           |                                |
| 43 |                  |                      |                                            |                                |
| 44 |                  |                      | clinical relevance of chosen efficacy and  |                                |
| 45 |                  |                      |                                            |                                |
| 46 |                  |                      | harm outcomes is strongly                  |                                |
| 47 |                  |                      |                                            |                                |
| 48 |                  |                      | recommended                                |                                |
| 49 |                  |                      |                                            |                                |
| 50 |                  |                      |                                            |                                |
| 51 |                  |                      |                                            |                                |
| 52 |                  |                      |                                            |                                |
| 53 |                  |                      |                                            |                                |
| 54 | Participant      | <a href="#">#13</a>  | Time schedule of enrolment,                | Figure 1                       |
| 55 |                  |                      |                                            |                                |
| 56 | timeline         |                      | interventions (including any run-ins and   |                                |
| 57 |                  |                      |                                            |                                |
| 58 |                  |                      |                                            |                                |
| 59 |                  |                      |                                            |                                |
| 60 |                  |                      |                                            |                                |

washouts), assessments, and visits for participants. A schematic diagram is highly recommended (see Figure)

|    |             |                      |                                           |      |
|----|-------------|----------------------|-------------------------------------------|------|
| 1  |             |                      |                                           |      |
| 2  |             |                      |                                           |      |
| 3  |             |                      |                                           |      |
| 4  |             |                      |                                           |      |
| 5  |             |                      |                                           |      |
| 6  |             |                      |                                           |      |
| 7  |             |                      |                                           |      |
| 8  | Sample size | <a href="#">#14</a>  | Estimated number of participants          | 14   |
| 9  |             |                      |                                           |      |
| 10 |             |                      | needed to achieve study objectives and    |      |
| 11 |             |                      | how it was determined, including clinical |      |
| 12 |             |                      | and statistical assumptions supporting    |      |
| 13 |             |                      | any sample size calculations              |      |
| 14 |             |                      |                                           |      |
| 15 |             |                      |                                           |      |
| 16 |             |                      |                                           |      |
| 17 |             |                      |                                           |      |
| 18 |             |                      |                                           |      |
| 19 |             |                      |                                           |      |
| 20 | Recruitment | <a href="#">#15</a>  | Strategies for achieving adequate         | 9-10 |
| 21 |             |                      | participant enrolment to reach target     |      |
| 22 |             |                      | sample size                               |      |
| 23 |             |                      |                                           |      |
| 24 |             |                      |                                           |      |
| 25 |             |                      |                                           |      |
| 26 |             |                      |                                           |      |
| 27 |             |                      |                                           |      |
| 28 | Allocation: | <a href="#">#16a</a> | Method of generating the allocation       | 10   |
| 29 | sequence    |                      | sequence (eg, computer-generated          |      |
| 30 |             |                      | random numbers), and list of any          |      |
| 31 | generation  |                      | factors for stratification. To reduce     |      |
| 32 |             |                      | predictability of a random sequence,      |      |
| 33 |             |                      | details of any planned restriction (eg,   |      |
| 34 |             |                      | blocking) should be provided in a         |      |
| 35 |             |                      | separate document that is unavailable     |      |
| 36 |             |                      | to those who enrol participants or        |      |
| 37 |             |                      | assign interventions                      |      |
| 38 |             |                      |                                           |      |
| 39 |             |                      |                                           |      |
| 40 |             |                      |                                           |      |
| 41 |             |                      |                                           |      |
| 42 |             |                      |                                           |      |
| 43 |             |                      |                                           |      |
| 44 |             |                      |                                           |      |
| 45 |             |                      |                                           |      |
| 46 |             |                      |                                           |      |
| 47 |             |                      |                                           |      |
| 48 |             |                      |                                           |      |
| 49 |             |                      |                                           |      |
| 50 |             |                      |                                           |      |
| 51 | Allocation  | <a href="#">#16b</a> | Mechanism of implementing the             | 10   |
| 52 | concealment |                      | allocation sequence (eg, central          |      |
| 53 |             |                      | telephone; sequentially numbered,         |      |
| 54 | mechanism   |                      | opaque, sealed envelopes), describing     |      |
| 55 |             |                      |                                           |      |
| 56 |             |                      |                                           |      |
| 57 |             |                      |                                           |      |
| 58 |             |                      |                                           |      |
| 59 |             |                      |                                           |      |
| 60 |             |                      |                                           |      |



|    |                    |                                                              |                                   |
|----|--------------------|--------------------------------------------------------------|-----------------------------------|
| 1  |                    | any steps to conceal the sequence until                      |                                   |
| 2  |                    |                                                              |                                   |
| 3  |                    | interventions are assigned                                   |                                   |
| 4  |                    |                                                              |                                   |
| 5  |                    |                                                              |                                   |
| 6  | Allocation:        | <a href="#">#16c</a> Who will generate the allocation        | 9-10                              |
| 7  |                    |                                                              |                                   |
| 8  | implementation     | sequence, who will enrol participants,                       |                                   |
| 9  |                    |                                                              |                                   |
| 10 |                    | and who will assign participants to                          |                                   |
| 11 |                    |                                                              |                                   |
| 12 |                    | interventions                                                |                                   |
| 13 |                    |                                                              |                                   |
| 14 |                    |                                                              |                                   |
| 15 |                    |                                                              |                                   |
| 16 | Blinding (masking) | <a href="#">#17a</a> Who will be blinded after assignment to | 13                                |
| 17 |                    |                                                              |                                   |
| 18 |                    | interventions (eg, trial participants, care                  |                                   |
| 19 |                    |                                                              |                                   |
| 20 |                    | providers, outcome assessors, data                           |                                   |
| 21 |                    |                                                              |                                   |
| 22 |                    | analysts), and how                                           |                                   |
| 23 |                    |                                                              |                                   |
| 24 |                    |                                                              |                                   |
| 25 |                    |                                                              |                                   |
| 26 | Blinding           | <a href="#">#17b</a> If blinded, circumstances under which   | n/a.                              |
| 27 |                    |                                                              |                                   |
| 28 | (masking):         | unblinding is permissible, and                               | The assessors measuring           |
| 29 |                    |                                                              | students' height and weight will  |
| 30 | emergency          | procedure for revealing a participant's                      | be blinded to group allocation of |
| 31 |                    |                                                              | the schools. We did not           |
| 32 | unblinding         | allocated intervention during the trial                      | anticipate any necessary          |
| 33 |                    |                                                              | circumstances when unblinding     |
| 34 |                    |                                                              | is permissible.                   |
| 35 |                    |                                                              |                                   |
| 36 |                    |                                                              |                                   |
| 37 |                    |                                                              |                                   |
| 38 |                    |                                                              |                                   |
| 39 |                    |                                                              |                                   |
| 40 | Data collection    | <a href="#">#18a</a> Plans for assessment and collection of  | 13                                |
| 41 |                    |                                                              |                                   |
| 42 | plan               | outcome, baseline, and other trial data,                     |                                   |
| 43 |                    |                                                              |                                   |
| 44 |                    | including any related processes to                           |                                   |
| 45 |                    |                                                              |                                   |
| 46 |                    | promote data quality (eg, duplicate                          |                                   |
| 47 |                    |                                                              |                                   |
| 48 |                    | measurements, training of assessors)                         |                                   |
| 49 |                    |                                                              |                                   |
| 50 |                    | and a description of study instruments                       |                                   |
| 51 |                    |                                                              |                                   |
| 52 |                    | (eg, questionnaires, laboratory tests)                       |                                   |
| 53 |                    |                                                              |                                   |
| 54 |                    | along with their reliability and validity, if                |                                   |
| 55 |                    |                                                              |                                   |
| 56 |                    | known. Reference to where data                               |                                   |
| 57 |                    |                                                              |                                   |
| 58 |                    |                                                              |                                   |
| 59 |                    |                                                              |                                   |
| 60 |                    |                                                              |                                   |

|    |                 |                                                             |    |
|----|-----------------|-------------------------------------------------------------|----|
| 1  |                 | collection forms can be found, if not in                    |    |
| 2  |                 |                                                             |    |
| 3  |                 | the protocol                                                |    |
| 4  |                 |                                                             |    |
| 5  |                 |                                                             |    |
| 6  | Data collection | <a href="#">#18b</a> Plans to promote participant retention | 15 |
| 7  |                 |                                                             |    |
| 8  | plan: retention | and complete follow-up, including list of                   |    |
| 9  |                 |                                                             |    |
| 10 |                 | any outcome data to be collected for                        |    |
| 11 |                 |                                                             |    |
| 12 |                 | participants who discontinue or deviate                     |    |
| 13 |                 |                                                             |    |
| 14 |                 | from intervention protocols                                 |    |
| 15 |                 |                                                             |    |
| 16 |                 |                                                             |    |
| 17 |                 |                                                             |    |
| 18 | Data management | <a href="#">#19</a> Plans for data entry, coding, security, | 3  |
| 19 |                 |                                                             |    |
| 20 |                 | and storage, including any related                          |    |
| 21 |                 |                                                             |    |
| 22 |                 | processes to promote data quality (eg,                      |    |
| 23 |                 |                                                             |    |
| 24 |                 | double data entry; range checks for                         |    |
| 25 |                 |                                                             |    |
| 26 |                 | data values). Reference to where                            |    |
| 27 |                 |                                                             |    |
| 28 |                 | details of data management procedures                       |    |
| 29 |                 |                                                             |    |
| 30 |                 | can be found, if not in the protocol                        |    |
| 31 |                 |                                                             |    |
| 32 |                 |                                                             |    |
| 33 |                 |                                                             |    |
| 34 | Statistics:     | <a href="#">#20a</a> Statistical methods for analysing      | 15 |
| 35 |                 |                                                             |    |
| 36 | outcomes        | primary and secondary outcomes.                             |    |
| 37 |                 |                                                             |    |
| 38 |                 | Reference to where other details of the                     |    |
| 39 |                 |                                                             |    |
| 40 |                 | statistical analysis plan can be found, if                  |    |
| 41 |                 |                                                             |    |
| 42 |                 | not in the protocol                                         |    |
| 43 |                 |                                                             |    |
| 44 |                 |                                                             |    |
| 45 |                 |                                                             |    |
| 46 | Statistics:     | <a href="#">#20b</a> Methods for any additional analyses    | 15 |
| 47 |                 |                                                             |    |
| 48 | additional      | (eg, subgroup and adjusted analyses)                        |    |
| 49 |                 |                                                             |    |
| 50 | analyses        |                                                             |    |
| 51 |                 |                                                             |    |
| 52 |                 |                                                             |    |
| 53 |                 |                                                             |    |
| 54 |                 |                                                             |    |
| 55 |                 |                                                             |    |
| 56 |                 |                                                             |    |
| 57 |                 |                                                             |    |
| 58 |                 |                                                             |    |
| 59 |                 |                                                             |    |
| 60 |                 |                                                             |    |

|    |                      |                      |                                            |                                |
|----|----------------------|----------------------|--------------------------------------------|--------------------------------|
| 1  | Statistics: analysis | <a href="#">#20c</a> | Definition of analysis population relating | 15                             |
| 2  |                      |                      |                                            |                                |
| 3  | population and       |                      | to protocol non-adherence (eg, as          |                                |
| 4  |                      |                      |                                            |                                |
| 5  | missing data         |                      | randomised analysis), and any              |                                |
| 6  |                      |                      |                                            |                                |
| 7  |                      |                      | statistical methods to handle missing      |                                |
| 8  |                      |                      |                                            |                                |
| 9  |                      |                      | data (eg, multiple imputation)             |                                |
| 10 |                      |                      |                                            |                                |
| 11 |                      |                      |                                            |                                |
| 12 |                      |                      |                                            |                                |
| 13 | Data monitoring:     | <a href="#">#21a</a> | Composition of data monitoring             | 18                             |
| 14 |                      |                      |                                            |                                |
| 15 | formal committee     |                      | committee (DMC); summary of its role       |                                |
| 16 |                      |                      |                                            |                                |
| 17 |                      |                      | and reporting structure; statement of      |                                |
| 18 |                      |                      |                                            |                                |
| 19 |                      |                      | whether it is independent from the         |                                |
| 20 |                      |                      |                                            |                                |
| 21 |                      |                      | sponsor and competing interests; and       |                                |
| 22 |                      |                      |                                            |                                |
| 23 |                      |                      | reference to where further details about   |                                |
| 24 |                      |                      |                                            |                                |
| 25 |                      |                      | its charter can be found, if not in the    |                                |
| 26 |                      |                      |                                            |                                |
| 27 |                      |                      | protocol. Alternatively, an explanation of |                                |
| 28 |                      |                      |                                            |                                |
| 29 |                      |                      | why a DMC is not needed                    |                                |
| 30 |                      |                      |                                            |                                |
| 31 |                      |                      |                                            |                                |
| 32 |                      |                      |                                            |                                |
| 33 |                      |                      |                                            |                                |
| 34 | Data monitoring:     | <a href="#">#21b</a> | Description of any interim analyses and    | n/a.                           |
| 35 |                      |                      |                                            |                                |
| 36 | interim analysis     |                      | stopping guidelines, including who will    |                                |
| 37 |                      |                      |                                            |                                |
| 38 |                      |                      | have access to these interim results and   | This is a childhood obesity    |
| 39 |                      |                      |                                            | prevention intervention.       |
| 40 |                      |                      | make the final decision to terminate the   |                                |
| 41 |                      |                      |                                            | Based on our previous          |
| 42 |                      |                      | trial                                      |                                |
| 43 |                      |                      |                                            | experiences, it is less likely |
| 44 |                      |                      |                                            | that discontinuing             |
| 45 |                      |                      |                                            | interventions will take place. |
| 46 |                      |                      |                                            |                                |
| 47 |                      |                      |                                            |                                |
| 48 |                      |                      |                                            |                                |
| 49 |                      |                      |                                            |                                |
| 50 |                      |                      |                                            |                                |
| 51 |                      |                      |                                            |                                |
| 52 | Harms                | <a href="#">#22</a>  | Plans for collecting, assessing,           | 16 (we will use                |
| 53 |                      |                      |                                            |                                |
| 54 |                      |                      | reporting, and managing solicited and      | questionnaires to collect and  |
| 55 |                      |                      |                                            |                                |
| 56 |                      |                      | spontaneously reported adverse events      |                                |
| 57 |                      |                      |                                            |                                |
| 58 |                      |                      |                                            |                                |
| 59 |                      |                      |                                            |                                |
| 60 |                      |                      |                                            |                                |

|    |                                      |                                                                                                                                                                                                                                                        |                                                                                                                                                                        |
|----|--------------------------------------|--------------------------------------------------------------------------------------------------------------------------------------------------------------------------------------------------------------------------------------------------------|------------------------------------------------------------------------------------------------------------------------------------------------------------------------|
|    |                                      | and other unintended effects of trial interventions or trial conduct                                                                                                                                                                                   | assess any adverse events or other process data)                                                                                                                       |
| 1  |                                      |                                                                                                                                                                                                                                                        |                                                                                                                                                                        |
| 2  |                                      |                                                                                                                                                                                                                                                        |                                                                                                                                                                        |
| 3  |                                      |                                                                                                                                                                                                                                                        |                                                                                                                                                                        |
| 4  |                                      |                                                                                                                                                                                                                                                        |                                                                                                                                                                        |
| 5  |                                      |                                                                                                                                                                                                                                                        |                                                                                                                                                                        |
| 6  | Auditing                             | <a href="#">#23</a> Frequency and procedures for auditing trial conduct, if any, and whether the process will be independent from investigators and the sponsor                                                                                        | 7 (This study is one of the five independent studies of the overall DECIDE project. This overall project is audited by the funder (National Key R&D Program of China). |
| 7  |                                      |                                                                                                                                                                                                                                                        |                                                                                                                                                                        |
| 8  |                                      |                                                                                                                                                                                                                                                        |                                                                                                                                                                        |
| 9  |                                      |                                                                                                                                                                                                                                                        |                                                                                                                                                                        |
| 10 |                                      |                                                                                                                                                                                                                                                        |                                                                                                                                                                        |
| 11 |                                      |                                                                                                                                                                                                                                                        |                                                                                                                                                                        |
| 12 |                                      |                                                                                                                                                                                                                                                        |                                                                                                                                                                        |
| 13 |                                      |                                                                                                                                                                                                                                                        |                                                                                                                                                                        |
| 14 |                                      |                                                                                                                                                                                                                                                        |                                                                                                                                                                        |
| 15 |                                      |                                                                                                                                                                                                                                                        |                                                                                                                                                                        |
| 16 |                                      |                                                                                                                                                                                                                                                        |                                                                                                                                                                        |
| 17 |                                      |                                                                                                                                                                                                                                                        |                                                                                                                                                                        |
| 18 |                                      |                                                                                                                                                                                                                                                        |                                                                                                                                                                        |
| 19 |                                      |                                                                                                                                                                                                                                                        |                                                                                                                                                                        |
| 20 | Research ethics approval             | <a href="#">#24</a> Plans for seeking research ethics committee / institutional review board (REC / IRB) approval                                                                                                                                      | 2-3                                                                                                                                                                    |
| 21 |                                      |                                                                                                                                                                                                                                                        |                                                                                                                                                                        |
| 22 |                                      |                                                                                                                                                                                                                                                        |                                                                                                                                                                        |
| 23 |                                      |                                                                                                                                                                                                                                                        |                                                                                                                                                                        |
| 24 |                                      |                                                                                                                                                                                                                                                        |                                                                                                                                                                        |
| 25 |                                      |                                                                                                                                                                                                                                                        |                                                                                                                                                                        |
| 26 |                                      |                                                                                                                                                                                                                                                        |                                                                                                                                                                        |
| 27 |                                      |                                                                                                                                                                                                                                                        |                                                                                                                                                                        |
| 28 | Protocol amendments                  | <a href="#">#25</a> Plans for communicating important protocol modifications (eg, changes to eligibility criteria, outcomes, analyses) to relevant parties (eg, investigators, REC / IRBs, trial participants, trial registries, journals, regulators) | 2-3                                                                                                                                                                    |
| 29 |                                      |                                                                                                                                                                                                                                                        |                                                                                                                                                                        |
| 30 |                                      |                                                                                                                                                                                                                                                        |                                                                                                                                                                        |
| 31 |                                      |                                                                                                                                                                                                                                                        |                                                                                                                                                                        |
| 32 |                                      |                                                                                                                                                                                                                                                        |                                                                                                                                                                        |
| 33 |                                      |                                                                                                                                                                                                                                                        |                                                                                                                                                                        |
| 34 |                                      |                                                                                                                                                                                                                                                        |                                                                                                                                                                        |
| 35 |                                      |                                                                                                                                                                                                                                                        |                                                                                                                                                                        |
| 36 |                                      |                                                                                                                                                                                                                                                        |                                                                                                                                                                        |
| 37 |                                      |                                                                                                                                                                                                                                                        |                                                                                                                                                                        |
| 38 |                                      |                                                                                                                                                                                                                                                        |                                                                                                                                                                        |
| 39 |                                      |                                                                                                                                                                                                                                                        |                                                                                                                                                                        |
| 40 |                                      |                                                                                                                                                                                                                                                        |                                                                                                                                                                        |
| 41 |                                      |                                                                                                                                                                                                                                                        |                                                                                                                                                                        |
| 42 | Consent or assent                    | <a href="#">#26a</a> Who will obtain informed consent or assent from potential trial participants or authorised surrogates, and how (see Item 32)                                                                                                      | 10                                                                                                                                                                     |
| 43 |                                      |                                                                                                                                                                                                                                                        |                                                                                                                                                                        |
| 44 |                                      |                                                                                                                                                                                                                                                        |                                                                                                                                                                        |
| 45 |                                      |                                                                                                                                                                                                                                                        |                                                                                                                                                                        |
| 46 |                                      |                                                                                                                                                                                                                                                        |                                                                                                                                                                        |
| 47 |                                      |                                                                                                                                                                                                                                                        |                                                                                                                                                                        |
| 48 |                                      |                                                                                                                                                                                                                                                        |                                                                                                                                                                        |
| 49 |                                      |                                                                                                                                                                                                                                                        |                                                                                                                                                                        |
| 50 |                                      |                                                                                                                                                                                                                                                        |                                                                                                                                                                        |
| 51 |                                      |                                                                                                                                                                                                                                                        |                                                                                                                                                                        |
| 52 | Consent or assent: ancillary studies | <a href="#">#26b</a> Additional consent provisions for collection and use of participant data                                                                                                                                                          | n/a.<br>This study will not collect biological specimens.                                                                                                              |
| 53 |                                      |                                                                                                                                                                                                                                                        |                                                                                                                                                                        |
| 54 |                                      |                                                                                                                                                                                                                                                        |                                                                                                                                                                        |
| 55 |                                      |                                                                                                                                                                                                                                                        |                                                                                                                                                                        |
| 56 |                                      |                                                                                                                                                                                                                                                        |                                                                                                                                                                        |
| 57 |                                      |                                                                                                                                                                                                                                                        |                                                                                                                                                                        |
| 58 |                                      |                                                                                                                                                                                                                                                        |                                                                                                                                                                        |
| 59 |                                      |                                                                                                                                                                                                                                                        |                                                                                                                                                                        |
| 60 |                                      |                                                                                                                                                                                                                                                        |                                                                                                                                                                        |

|    |                       |                      |                                             |                               |
|----|-----------------------|----------------------|---------------------------------------------|-------------------------------|
| 1  |                       |                      | and biological specimens in ancillary       |                               |
| 2  |                       |                      | studies, if applicable                      |                               |
| 3  |                       |                      |                                             |                               |
| 4  |                       |                      |                                             |                               |
| 5  |                       |                      |                                             |                               |
| 6  | Confidentiality       | <a href="#">#27</a>  | How personal information about              | 3                             |
| 7  |                       |                      |                                             |                               |
| 8  |                       |                      | potential and enrolled participants will    |                               |
| 9  |                       |                      |                                             |                               |
| 10 |                       |                      | be collected, shared, and maintained in     |                               |
| 11 |                       |                      |                                             |                               |
| 12 |                       |                      | order to protect confidentiality before,    |                               |
| 13 |                       |                      |                                             |                               |
| 14 |                       |                      | during, and after the trial                 |                               |
| 15 |                       |                      |                                             |                               |
| 16 |                       |                      |                                             |                               |
| 17 |                       |                      |                                             |                               |
| 18 | Declaration of        | <a href="#">#28</a>  | Financial and other competing interests     | 26                            |
| 19 | interests             |                      | for principal investigators for the overall |                               |
| 20 |                       |                      |                                             |                               |
| 21 |                       |                      | trial and each study site                   |                               |
| 22 |                       |                      |                                             |                               |
| 23 |                       |                      |                                             |                               |
| 24 |                       |                      |                                             |                               |
| 25 | Data access           | <a href="#">#29</a>  | Statement of who will have access to        | 3                             |
| 26 |                       |                      |                                             |                               |
| 27 |                       |                      | the final trial dataset, and disclosure of  |                               |
| 28 |                       |                      |                                             |                               |
| 29 |                       |                      | contractual agreements that limit such      |                               |
| 30 |                       |                      |                                             |                               |
| 31 |                       |                      | access for investigators                    |                               |
| 32 |                       |                      |                                             |                               |
| 33 |                       |                      |                                             |                               |
| 34 |                       |                      |                                             |                               |
| 35 | Ancillary and post    | <a href="#">#30</a>  | Provisions, if any, for ancillary and post- | n/a.                          |
| 36 | trial care            |                      | trial care, and for compensation to those   |                               |
| 37 |                       |                      |                                             |                               |
| 38 |                       |                      | who suffer harm from trial participation    | This is a childhood obesity   |
| 39 |                       |                      |                                             | prevention intervention.      |
| 40 |                       |                      |                                             |                               |
| 41 |                       |                      |                                             | Based on our experiences, it  |
| 42 |                       |                      |                                             | is less likely that ancillary |
| 43 |                       |                      |                                             | and post-trial care will take |
| 44 |                       |                      |                                             | place.                        |
| 45 |                       |                      |                                             |                               |
| 46 |                       |                      |                                             |                               |
| 47 |                       |                      |                                             |                               |
| 48 |                       |                      |                                             |                               |
| 49 |                       |                      |                                             |                               |
| 50 |                       |                      |                                             |                               |
| 51 |                       |                      |                                             |                               |
| 52 |                       |                      |                                             |                               |
| 53 | Dissemination         | <a href="#">#31a</a> | Plans for investigators and sponsor to      | 3                             |
| 54 | policy: trial results |                      | communicate trial results to participants,  |                               |
| 55 |                       |                      |                                             |                               |
| 56 |                       |                      | healthcare professionals, the public,       |                               |
| 57 |                       |                      |                                             |                               |
| 58 |                       |                      |                                             |                               |
| 59 |                       |                      |                                             |                               |
| 60 |                       |                      |                                             |                               |

and other relevant groups (eg, via  
 publication, reporting in results  
 databases, or other data sharing  
 arrangements), including any  
 publication restrictions

|    |                    |                      |                                              |                             |
|----|--------------------|----------------------|----------------------------------------------|-----------------------------|
| 12 | Dissemination      | <a href="#">#31b</a> | Authorship eligibility guidelines and any    | n/a                         |
| 14 | policy: authorship |                      | intended use of professional writers         |                             |
| 18 | Dissemination      | <a href="#">#31c</a> | Plans, if any, for granting public access    | n/a                         |
| 20 | policy:            |                      | to the full protocol, participant-level      |                             |
| 22 | reproducible       |                      | dataset, and statistical code                |                             |
| 24 | research           |                      |                                              |                             |
| 28 | Informed consent   | <a href="#">#32</a>  | Model consent form and other related         | 10                          |
| 30 | materials          |                      | documentation given to participants and      |                             |
| 32 |                    |                      | authorised surrogates                        |                             |
| 36 | Biological         | <a href="#">#33</a>  | Plans for collection, laboratory             | n/a                         |
| 38 | specimens          |                      | evaluation, and storage of biological        |                             |
| 39 |                    |                      | specimens for genetic or molecular           | This study will not collect |
| 41 |                    |                      | analysis in the current trial and for future | biological specimens.       |
| 43 |                    |                      | use in ancillary studies, if applicable      |                             |

The SPIRIT checklist is distributed under the terms of the Creative Commons Attribution License CC-BY-ND 3.0. This checklist can be completed online using <https://www.goodreports.org/>, a tool made by the [EQUATOR Network](#) in collaboration with [Penelope.ai](#)

# BMJ Open

## A school-based, multi-faceted health promotion programme to prevent obesity among children: protocol of a cluster-randomized controlled trial (the DECIDE-Children study)

|                                 |                                                                                                                                                                                                                                                                                                                                                                                                                                                                                                                                                                                                                                                                                                                                                                                                                                                                                                                                                                                                                                                                                                                                                                                                                                         |
|---------------------------------|-----------------------------------------------------------------------------------------------------------------------------------------------------------------------------------------------------------------------------------------------------------------------------------------------------------------------------------------------------------------------------------------------------------------------------------------------------------------------------------------------------------------------------------------------------------------------------------------------------------------------------------------------------------------------------------------------------------------------------------------------------------------------------------------------------------------------------------------------------------------------------------------------------------------------------------------------------------------------------------------------------------------------------------------------------------------------------------------------------------------------------------------------------------------------------------------------------------------------------------------|
| Journal:                        | <i>BMJ Open</i>                                                                                                                                                                                                                                                                                                                                                                                                                                                                                                                                                                                                                                                                                                                                                                                                                                                                                                                                                                                                                                                                                                                                                                                                                         |
| Manuscript ID                   | bmjopen-2018-027902.R2                                                                                                                                                                                                                                                                                                                                                                                                                                                                                                                                                                                                                                                                                                                                                                                                                                                                                                                                                                                                                                                                                                                                                                                                                  |
| Article Type:                   | Protocol                                                                                                                                                                                                                                                                                                                                                                                                                                                                                                                                                                                                                                                                                                                                                                                                                                                                                                                                                                                                                                                                                                                                                                                                                                |
| Date Submitted by the Author:   | 13-Sep-2019                                                                                                                                                                                                                                                                                                                                                                                                                                                                                                                                                                                                                                                                                                                                                                                                                                                                                                                                                                                                                                                                                                                                                                                                                             |
| Complete List of Authors:       | <p>Liu, Zheng; Peking University, Department of Maternal and Child Health, School of Public Health<br/> Wu, Yangfeng; Peking University Clinical Research Institute, Peking University Clinical Research Institute<br/> Niu, Wen-Yi; Peking University, Department of Social Medicine and Health Education, School of Public Health<br/> Feng, Xiangxian; Changzhi Medical College, Changzhi Medical College<br/> Lin, Yi; Urumqi Primary and Secondary School Health Care Center, Urumqi Primary and Secondary School Health Care Center<br/> Gao, Aiyu; Dongcheng Primary and Secondary School Health Care Center, Dongcheng Primary and Secondary School Health Care Center<br/> Zhang, Fang; Mentougou Primary and Secondary School Health Care Center, Mentougou Primary and Secondary School Health Care Center<br/> Fang, Hai; Peking University, China Center for Health Development Studies<br/> GAO, Pei; Peking University, Department of Epidemiology and Biostatistics, School of Public Health<br/> Li, Hui-Juan; Peking University Clinical Research Institute, Peking University Clinical Research Institute<br/> Wang, Haijun; School of Public Health, Peking University, Department of Maternal and Child Health</p> |
| <b>Primary Subject Heading</b>: | Epidemiology                                                                                                                                                                                                                                                                                                                                                                                                                                                                                                                                                                                                                                                                                                                                                                                                                                                                                                                                                                                                                                                                                                                                                                                                                            |
| Secondary Subject Heading:      | Paediatrics, Public health                                                                                                                                                                                                                                                                                                                                                                                                                                                                                                                                                                                                                                                                                                                                                                                                                                                                                                                                                                                                                                                                                                                                                                                                              |
| Keywords:                       | pediatric obesity, cluster, prevention, randomized controlled trial                                                                                                                                                                                                                                                                                                                                                                                                                                                                                                                                                                                                                                                                                                                                                                                                                                                                                                                                                                                                                                                                                                                                                                     |
|                                 |                                                                                                                                                                                                                                                                                                                                                                                                                                                                                                                                                                                                                                                                                                                                                                                                                                                                                                                                                                                                                                                                                                                                                                                                                                         |

SCHOLARONE™  
Manuscripts

1  
2  
3  
4 1 **A school-based, multi-faceted health promotion programme to**  
5  
6 2 **prevent obesity among children: protocol of a cluster-randomized**  
7  
8 3 **controlled trial (the DECIDE-Children study)**  
9  
10  
11  
12 4

13  
14 5 Zheng Liu<sup>1</sup>, Yang-Feng Wu<sup>2</sup>, Wen-Yi Niu<sup>3</sup>, Xiang-Xian Feng<sup>4</sup>, Yi Lin<sup>5</sup>, Ai-Yu Gao<sup>6</sup>,  
15  
16 6 Fang Zhang<sup>7</sup>, Hai Fang<sup>8</sup>, Pei Gao<sup>9</sup>, Hui-Juan Li<sup>2</sup>, Hai-Jun Wang<sup>1</sup>, the study team for  
17  
18 7 the DECIDE-children study  
19  
20  
21

22 8 1 Department of Maternal and Child Health, School of Public Health, Peking University,  
23  
24 9 Beijing, China; 2 Peking University Clinical Research Institute, Beijing, China; 3  
25  
26 10 Department of Social Medicine and Health Education, School of Public Health, Peking  
27  
28 11 University, Beijing, China; 4 Changzhi Medical College, Shanxi, China; 5 Urumqi  
29  
30 12 Primary and Secondary School Health Care Center, Xinjiang, China; 6 Dongcheng  
31  
32 13 Primary and Secondary School Health Care Center, Beijing, China; 7 Mentougou  
33  
34 14 Primary and Secondary School Health Care Center, Beijing, China; 8 China Center for  
35  
36 15 Health Development Studies, Peking University, Beijing, China; 9 Department of  
37  
38 16 Epidemiology and Biostatistics, School of Public Health, Peking University, Beijing,  
39  
40 17 China  
41  
42  
43  
44  
45  
46  
47  
48  
49

50 19 Corresponding author:

51  
52  
53 20 Professor Hai-Jun Wang, Department of Maternal and Child Health, School of Public  
54  
55 21 Health, Peking University. No. 38 Xueyuan Road, Haidian District, 100191 Beijing,  
56  
57 22 China. Email: whjun@pku.edu.cn  
58  
59  
60



1  
2  
3  
4 23**Abstract**

5  
6 24 **Introduction** Obesity is a public health concern that is becoming increasingly more  
7  
8  
9 25 serious worldwide. Effective and sustainable childhood obesity prevention strategies  
10  
11 26 may help to reduce the prevalence of obesity and may have an impact on lifelong health.  
12  
13  
14 27 However, few such strategies have been rigorously evaluated for Chinese children in  
15  
16  
17 28 different regions of China.

18  
19 29 **Methods and analysis** DECIDE-Children is a cluster-randomized controlled trial that  
20  
21 30 aims to assess the effectiveness and sustainability of a school-based, multi-faceted  
22  
23 31 intervention to prevent obesity among Grade 4 primary school students (8 to 10 years  
24  
25 32 old) in China. Twenty-four schools (approximately 1200 students) from above average,  
26  
27 33 average and below average developed regions in China will be randomized to an  
28  
29 34 intervention (12 schools) or usual practice (12 schools) group. The intervention will last  
30  
31 35 for one year and consist of activities towards students, parents and school environment.  
32  
33 36 A smartphone application will be used to assist in providing information on, monitoring  
34  
35 37 and providing feedback on the behaviours and body weight of the students. Data will  
36  
37 38 be collected at baseline, 4 months, 9 months and 21 months. The primary outcome will  
38  
39 39 be the difference between groups in the change in students' body mass index (BMI) at  
40  
41 40 9 months after the baseline investigation. The secondary outcomes will include the  
42  
43 41 differences between groups in the changes in anthropometric measures, diet, physical  
44  
45 42 activity levels and other measures at the follow-up visits. A variety of process  
46  
47 43 evaluation methods will be used to evaluate the implementation process of the complex  
48  
49 44 intervention.

1  
2  
3  
4 45 **Ethics and dissemination** This study was approved by the Peking University  
5  
6 46 Institution Review Board (IRB00001052-18021). The results will be disseminated  
7  
8  
9 47 through publication in peer-reviewed journals, presentations at conferences and in lay  
10  
11  
12 48 summaries provided to school staff and participants.  
13  
14 49 **Trial registration** ClinicalTrials.gov: NCT03665857.  
15  
16  
17  
18  
19  
20  
21  
22  
23  
24  
25  
26  
27  
28  
29  
30  
31  
32  
33  
34  
35  
36  
37  
38  
39  
40  
41  
42  
43  
44  
45  
46  
47  
48  
49  
50  
51  
52  
53  
54  
55  
56  
57  
58  
59  
60

For peer review only

1  
2  
3  
4 **50 Strengths and limitations of this study**

- 5  
6  
7 51 1. This study will rigorously evaluate the effectiveness of a childhood obesity  
8  
9 52 prevention programme in eastern, central and western regions with different levels of  
10  
11 53 economic development in China.  
12  
13  
14 54 2. We will employ a smartphone application to assist in providing information on,  
15  
16 55 monitoring and providing feedback on the behaviours and body weight of the students.  
17  
18  
19 56 3. We will include an explicit process evaluation plan for both the intervention and the  
20  
21 57 control groups, which will evaluate the implementation process of the complex  
22  
23 58 intervention.  
24  
25  
26  
27 59 4. A follow-up investigation will be conducted to evaluate the sustainability of the  
28  
29 60 intervention.  
30  
31  
32 61 5. This intervention is limited by a relatively short duration, but additional funding will  
33  
34  
35 62 be sought for the implementation of a long-term intervention in the future.  
36  
37  
38  
39  
40  
41  
42  
43  
44  
45  
46  
47  
48  
49  
50  
51  
52  
53  
54  
55  
56  
57  
58  
59  
60

## 63 **Introduction**

64 Childhood obesity is a significant public health concern worldwide [1, 2]. In China,  
65 childhood obesity has dramatically increased as the economy has grown quickly over  
66 the past decades. The prevalence of obesity among 7- to 18-year-old Chinese children  
67 increased from 0.1% in 1985 to 7.3% in 2014 [2]. Childhood obesity is associated with  
68 not only adverse consequences on the physical and mental health of children in the short  
69 term [3, 4], but also increases the risk of developing cardiovascular diseases in the long  
70 term [5, 6]. Accordingly, effective strategies to curb and reduce childhood obesity  
71 prevalence may help to prevent cardiovascular diseases in the whole population in the  
72 long term.

73 The development of childhood obesity is complex and may involve multi-factorial  
74 mechanisms, but in most cases, it essentially results from an imbalance between energy  
75 intake and energy expenditure. Children spend half of their waking hours at school and  
76 consume at least one-third of their daily calories at school; thus, school-based  
77 interventions are promising in preventing childhood obesity [7]. In particular, multi-  
78 faceted interventions combining diet, physical activity and a family component have  
79 shown the highest effectiveness [7, 8]. However, there is a paucity of rigorously  
80 developed and evaluated prevention interventions for Chinese children [8, 9]. Moreover,  
81 not all school-based interventions have been effective in preventing excessive weight  
82 gain in children [10, 11]. One potential interpretation of this finding is that adherence  
83 to the intervention components was not guaranteed [11]. It is thus crucial to increase  
84 our understanding of how and why these interventions work or do not work [12]. To

1  
2  
3  
4 85 achieve this, a thorough process evaluation of the intervention implementation is  
5  
6 86 necessary. Furthermore, socioeconomic development is associated with patterns of  
7  
8  
9 87 childhood obesity [13] and may also affect the effectiveness of a childhood obesity  
10  
11  
12 88 intervention. Social disparities in the patterns of obesity differ between China and  
13  
14 89 Western countries. In China, socioeconomic development has been positively  
15  
16  
17 90 associated with overweight and obesity prevalence in children [13]. However, previous  
18  
19  
20 91 studies have been largely conducted in a single region, which limits the generalizability  
21  
22  
23 92 of study findings to other populations. Another weakness is that most studies examined  
24  
25  
26 93 outcomes only at the end of the intervention. Thus, it remains unclear whether healthy  
27  
28  
29 94 behaviours and a healthy weight are maintained beyond the period of the intervention.

### 30 95 *School system in China*

31  
32  
33 96 In primary schools in China, there are six grades in total, and the age of the students  
34  
35  
36 97 ranges from 6 to 11 years. The typical size of a Chinese class is fewer than 45 students,  
37  
38  
39 98 but varies in different schools, ranging from 30 to 60 students. There are two school  
40  
41  
42 99 policies that have been issued by the Chinese government that are particularly relevant  
43  
44  
45 100 to the prevention and management of childhood obesity. First, schools should have  
46  
47  
48 101 school doctors or health care teachers who provide in-house school health care. The  
49  
50  
51 102 routine practices include student health surveillance, health education for students, and  
52  
53  
54 103 the prevention and control of common diseases in students. Second, schools should  
55  
56  
57 104 implement 'One-Hour Physical Activity On Campus Every School Day'. That is, the  
58  
59  
60 105 total duration of physical activity (i.e., physical education classes, exercises during  
106  
breaks from class and extracurricular activities) per school day should be no less than

1  
2  
3  
4 107 one hour. However, the implementation of these policies in the school systems in China  
5  
6 108 varies by region [14].  
7  
8

9 109 ***Development of a childhood obesity intervention***

10  
11 110 To fill in research gaps, in accordance with the school systems in China, we underwent  
12  
13  
14 111 four stages to develop the intervention: (1) we systematically reviewed previous  
15  
16  
17 112 literature to identify intervention elements related to intervention effectiveness; (2) we  
18  
19  
20 113 conducted focus group discussions and interviews with key informants (children,  
21  
22 114 parents, teachers, school principals, local health and education officials) to further  
23  
24  
25 115 revise and refine the intervention approaches; (3) we conducted a three-month, before-  
26  
27 116 after, pilot study at two primary schools in Beijing (one in an urban area and the other  
28  
29  
30 117 in a rural area) involving 58 Grade 4 students (mean age: 9.38±0.49 years) to test the  
31  
32  
33 118 feasibility of the proposed intervention [15]; and (4) we further discussed the proposed  
34  
35  
36 119 intervention with multiple experts. Based on all the work mentioned, we finally  
37  
38 120 developed the intervention elements used for this study.  
39

40 121 ***Aim and objectives***

41  
42  
43 122 To develop effective lifestyle interventions for the prevention and control of  
44  
45  
46 123 cardiovascular disease in China, the Diet, ExerCIse and CarDiovascular hEalth  
47  
48 124 (DECIDE) project was initiated in 2016. As one of five independent DECIDE studies,  
49  
50  
51 125 the DECIDE-Children study aims to develop a school-based, multi-faceted childhood  
52  
53  
54 126 obesity prevention programme targeting school children aged 8-10 years in three  
55  
56 127 different regions of China and rigorously test its effectiveness in preventing excessive  
57  
58 128 weight gain in Chinese primary school settings. The research objectives of the  
59  
60

1  
2  
3  
4 129 DECIDE-Children study were (1) to assess the effectiveness of the intervention  
5  
6 130 compared with the usual practice in preventing childhood overweight and obesity; (2)  
7  
8  
9 131 to determine the sustainability of the intervention in preventing overweight and obesity;  
10  
11  
12 132 and (3) to evaluate the process and health economics of the intervention.  
13

### 14 133 **Methods and analysis**

15  
16  
17 134 This protocol has been prepared in accordance with the Standard Protocol Items:  
18  
19 135 Recommendations for Interventional Trials (SPIRIT) statement [16, 17].  
20  
21

#### 22 136 *Study design*

23  
24 137 DECIDE-Children is a cluster-randomized, parallel-group controlled trial. To  
25  
26  
27 138 accommodate the social and economic variations within the country, we will  
28  
29  
30 139 intentionally select schools from three different regions of China: the above average  
31  
32  
33 140 developed area in the east (Beijing), the average developed area in central China  
34  
35 141 (Shanxi) and the below average developed area in the west (Xinjiang). A total of 24  
36  
37  
38 142 primary schools (clusters) equally distributed among three regions will be selected. In  
39  
40 143 Beijing, 4 schools will be selected from the Dongcheng district (located in the centre of  
41  
42  
43 144 the city), and 4 will be selected from the Mentougou district (located in a rural suburban  
44  
45 145 area). In Xinjiang, all 8 schools will be selected from Urumchi, the capital city of the  
46  
47  
48 146 autonomous region; four of the schools will be selected from the Shayiba district (an  
49  
50  
51 147 urban district), and the other four schools will be selected from the Shuimogou district  
52  
53  
54 148 (a rural district). In Shanxi, all 8 schools will be selected from only one urban district,  
55  
56 149 Changzhi, a small- to medium-sized city in the province. The reason for excluding rural  
57  
58  
59 150 schools in Changzhi is that most of the rural schools are boarding schools, and parents  
60

1  
2  
3  
4 151 are difficult to reach in boarding schools. Thus, a total of 24 primary schools from five  
5  
6 152 sites in three regions will be selected and randomized into two groups, the obesity  
7  
8  
9 153 prevention intervention group and the usual practice group. The intervention will be  
10  
11 154 implemented for one school year from late September 2018 to June 2019, and the study  
12  
13  
14 155 will continue with a one-year follow-up investigation in June 2020. Figure 1 shows the  
15  
16  
17 156 flow of the study.

## 19 157 ***Recruitment***

### 22 158 **Recruitment of the schools**

24 159 The present study will be carried out in Grade 4 students (8 to 10 years old), as they are  
25  
26  
27 160 sufficiently mature to understand health education information and are able to remain  
28  
29  
30 161 in the same school to complete the two-year study before they graduate. For a school  
31  
32  
33 162 to be eligible, the school principal must agree with the randomization procedure and  
34  
35  
36 163 comply with the study protocol. The total number of Grade 4 students must be greater  
37  
38 164 than 50 in the school, and schools that have implemented or are planning to implement  
39  
40  
41 165 an obesity prevention intervention or similar intervention programme will not be  
42  
43 166 eligible. Boarding schools and specialty schools for children with talents or minority  
44  
45  
46 167 ethnic groups will be excluded. Schools will also not be included if they have a definite  
47  
48 168 plan for relocation or cancellation in the next two years. For the schools participating  
49  
50  
51 169 in the programme, the size of a class will vary between fewer than 30 children and  
52  
53  
54 170 approximately 60 children per class. If the number of students in each class is less than  
55  
56 171 50, we will recruit two classes from the school, and if the number of students is greater  
57  
58  
59 172 than 50, we will recruit one class to meet the sample size requirement. If there are more  
60



1  
2  
3  
4 173 classes in one school than needed for the study, the school principal will recommend  
5  
6 174 which classes we should select.

7  
8  
9 175 Three steps will be followed for the recruitment of the schools. First, project staff will  
10  
11 176 contact the local education authorities to gain their opinion, support, and approval of  
12  
13 177 the study and basic information of the schools (type of schools and the number of  
14  
15 178 students and teachers). Second, project staff will contact the schools by phone or visit  
16  
17 179 the schools to determine the eligibility of the selected schools for the study. Third, the  
18  
19 180 final list of eligible schools and classes will be made by the principal investigator and  
20  
21 181 schools will be invited to participate in the study by local research partners.

## 22 182 **Recruitment of the students**

23  
24  
25 183 After recruiting the schools and before conducting the baseline measurements, written  
26  
27 184 informed consent will be provided by all students and their primary caregivers (parents  
28  
29 185 in most cases) in the selected classes. Then, the parents who provide informed consent  
30  
31 186 will be required to complete a self-administrative questionnaire about the health status  
32  
33 187 of their children. The project staff will collect the questionnaires and if a parent reports  
34  
35 188 one of the following conditions, his or her children will be excluded: 1) medical history  
36  
37 189 of heart disease, hypertension, diabetes, tuberculosis, asthma, hepatitis or nephritis; 2)  
38  
39 190 obesity caused by endocrine diseases or side effects of drugs; 3) abnormal physical  
40  
41 191 development like dwarfism or gigantism; 4) physical deformity such as severe scoliosis,  
42  
43 192 pectus carinatum, limp, obvious O-leg or X-leg; 5) inability to participate in school  
44  
45 193 sport activities; 6) a loss in weight by vomiting or taking drugs during the past three  
46  
47 194 months.

1  
2  
3  
4 195 ***Randomization procedures***

5  
6 196 The random sequence of allocation of the schools (clusters) to the intervention or  
7  
8  
9 197 control group will be stratified by the study sites. Schools in the same study site will be  
10  
11  
12 198 randomly allocated in a 1:1 ratio to either the intervention or control group using a  
13  
14 199 computer-generated random number system (the simple random sampling method).  
15  
16  
17 200 Randomization will be performed by an independent person at the central coordinating  
18  
19 201 centre at Peking University Clinical Research Institute. The randomization will take  
20  
21  
22 202 place only after the baseline measurements are completed to ensure allocation  
23  
24  
25 203 concealment.

26  
27 204 ***Intervention***

28  
29  
30 205 We used the Social Ecological Model to identify intervention elements in this multi-  
31  
32 206 faceted health promotion programme [18]. As shown in Figure 2, the programme will  
33  
34  
35 207 target the influencing factors of childhood obesity at both individual (student-focused  
36  
37  
38 208 activities) and environmental levels (a supportive family and school environment), with  
39  
40 209 the intent to influence the knowledge, attitude and behaviours of school children.

41  
42  
43 210 **Description of the intervention components**

44  
45 211 The intervention components are described in Tables 1 and 2.

46  
47  
48 212 ***Student-focused activities:*** These activities will include health education activities for  
49  
50 213 students, the reinforcement of students' physical activity at school and the regular  
51  
52  
53 214 monitoring of students' weight and height.

54  
55  
56 215 ***Activities towards parents:*** These activities will include health education activities for  
57  
58 216 parents and the supervision and encouragement of children to increase their physical  
59  
60

1  
2  
3  
4 217 activity level outside of school.  
5

6 218 **Activities towards schools:** These activities will include school policies related to  
7  
8  
9 219 obesity prevention and health education activities for teachers.  
10

11 220 **The smartphone app:** Project staff, school teachers and parents will be suggested to  
12  
13  
14 221 install the app titled “Eat Wisely, Move Happily”. The app, which was developed based  
15  
16  
17 222 on behaviour change techniques [19], will aid in information diffusion, behaviour  
18  
19  
20 223 monitoring, weight management, assessment and feedback.  
21

#### 22 224 **Quality control of the intervention**

23  
24 225 Two manuals (“An Operation Manual for Project Staff Involved in the Multi-  
25  
26  
27 226 component Obesity Intervention among Primary School Students” and “An Operation  
28  
29  
30 227 Manual for School Team Members Involved in the Multi-component Obesity  
31  
32  
33 228 Intervention among Primary School Students”) have been developed for implementing  
34  
35  
36 229 and managing this complex intervention. The manuals describe in detail the duties of  
37  
38  
39 230 project staff and school team members (school principals, class teachers, physical  
40  
41  
42 231 education teachers, school doctors/health care teachers) in delivering the intervention.  
43  
44  
45 232 The manuals also describe the detailed workflow of the implementation of each  
46  
47  
48 233 intervention component, i.e., by whom, when, how and to what extent the specific  
49  
50  
51 234 intervention element should be delivered. All of the project staff and school team  
52  
53  
54 235 members will be required to conduct the intervention in accordance with the operation  
55  
56  
57 236 manuals.

58 237 During implementation of the intervention, regular field observations will be made and  
59  
60 238 the smartphone app records will be checked. If it is found that schools are not complying

1  
2  
3  
4 239 with the study protocol, project staff will communicate with school team members in a  
5  
6 240 timely manner and conduct follow-ups to improve the fidelity of the study results.  
7  
8

9 241 ***Control group***

10  
11 242 The twelve schools in the control group will not carry out any of the DECIDE-Children  
12  
13 243 intervention components and will continue their usual practice according to their own  
14  
15 244 teaching curriculum during the study period (from September 2018 to June 2020).  
16  
17 245 Participants in the control group will receive the same health education materials that  
18  
19 246 will have been delivered to those in the intervention group immediately after the 21-  
20  
21 247 month follow-up investigation is completed in June 2020.  
22  
23  
24  
25

26  
27 248 ***Outcome evaluation***

28  
29 249 Table 3 describes the study outcomes, including when and how the study outcomes will  
30  
31 250 be evaluated. Baseline measurements will be conducted in September 2018 for both the  
32  
33 251 intervention and the control groups. Follow-up measurements will be conducted 4  
34  
35 252 months after the baseline measurements are conducted in January (after one school  
36  
37 253 semester and half way through the intervention), 9 months after the baseline  
38  
39 254 measurements are conducted in June 2019 (after one school year and immediately after  
40  
41 255 the whole intervention programme is completed) and 21 months after the baseline  
42  
43 256 measurements are conducted in June 2020 (after two school years and 12 months after  
44  
45 257 the intervention is completed).  
46  
47  
48  
49  
50  
51

52  
53 258 At the baseline and all follow-up visits, anthropometric measures (height, weight, waist  
54  
55 259 and hip circumference, systolic and diastolic blood pressures, body fat percentage) and  
56  
57 260 physical fitness measures (one-minute rope jumping, one-minute sit-up, long standing  
58  
59  
60

1  
2  
3  
4 261 jump, shuttle run (50 m×8)) will be collected by the trained outcome assessors using  
5  
6 262 the same device and/or forms according to the standard methods and procedures. The  
7  
8  
9 263 assessors measuring students' height and weight will be blinded to the group allocation  
10  
11 264 of the schools. We will use questionnaires to measure students' behaviours (duration of  
12  
13 265 moderate-to-vigorous physical activity, eating behaviour, sedentary behaviour), school  
14  
15 266 policies for prevention and management of childhood obesity, and other potential  
16  
17 267 moderators/mediators of the intervention (e.g., stage of readiness for behaviour change  
18  
19 268 related to weight reduction). The questionnaires were developed based on previous  
20  
21 269 studies and the pilot study. The questionnaires were found to be feasible for this study  
22  
23 270 and acceptable to students and their parents [20-22].  
24  
25  
26  
27  
28  
29

### 30 **Outcomes**

31  
32 272 The primary outcome is the difference between groups in the change in students' body  
33  
34 273 mass index ( $BMI = \text{weight (kg)} / (\text{height (m)})^2$ ) immediately after the intervention  
35  
36 274 completion (9 months after the baseline measurements are conducted). The secondary  
37  
38 275 outcomes include the change in BMI one year after the intervention is completed (21  
39  
40 276 months after the baseline measurements are conducted). In addition, we will compare  
41  
42 277 the following indices between groups at the follow-up visits: 1) change in students'  
43  
44 278 BMI z-score (standard deviation score will be calculated based on the World Health  
45  
46 279 Organization criteria [23]); 2) change in prevalence and incidence of childhood  
47  
48 280 overweight/obesity defined according to the criteria for Chinese children and  
49  
50 281 adolescents [24]; 3) change in students' waist circumference, waist-to-hip  
51  
52 282 circumference ratio and systolic and diastolic blood pressures; and 4) change in students'  
53  
54  
55  
56  
57  
58  
59  
60

1  
2  
3  
4 283 body fat percentage, physical fitness measures, behavioural outcomes and other  
5  
6 284 outcomes.

7  
8  
9 285 ***Sample size estimation***

10  
11 286 We assumed that the difference between the two groups in the change in BMI (effect  
12  
13  
14 287 size) would be 0.50 kg/m<sup>2</sup>, the standard deviation (SD) of the BMI would be 1.40 kg/m<sup>2</sup>,  
15  
16  
17 288 the intra-cluster correlation coefficient would be 0.05 and the rate of attrition would be  
18  
19  
20 289 10% for the sample size calculation in our study. We aimed to recruit a total of 1,200  
21  
22  
23 290 students from 24 schools with an average cluster size of 50 students per school. This  
24  
25  
26 291 sample size will provide 88% power with  $\alpha=0.05$  to detect a mean difference of 0.50  
27  
28  
29 292 kg/m<sup>2</sup> in the change in BMI between groups after the intervention lasting one school  
30  
31  
32 293 year.

33 294 ***Statistical analyses***

34  
35 295 Statistical analyses will be performed using SAS version 9.4 (SAS Institute Inc., Cary,  
36  
37  
38 296 NC, USA). All statistical tests will be two-sided at the 5% level of significance.  
39  
40  
41 297 Baseline characteristics at both the school and individual levels will be reported by  
42  
43  
44 298 using descriptive statistics.

45  
46 299 The primary analysis will be based on the intention-to-treat principle and include all  
47  
48  
49 300 students recruited with the baseline BMIs measured. Generalized linear mixed models  
50  
51  
52 301 will be used to compare the primary and secondary outcomes at 4, 9, and 21 months  
53  
54  
55 302 after the baseline measurements are conducted, and the models will adjust for the  
56  
57  
58 303 clustering effect and baseline outcome values. The missing data will be treated in the  
59  
60 304 maximum likelihood estimates assuming they are missing at random. The intra-cluster

1  
2  
3  
4 305 correlation coefficient will also be estimated. Sensitivity analysis will be performed on  
5  
6 306 the primary outcome using the last-value-carry-forward imputation if the percentage of  
7  
8  
9 307 missing data exceeds 5%. For continuous outcomes, we will report pre-, and post-  
10  
11 308 intervention means for the intervention and control groups and model-adjusted mean  
12  
13  
14 309 differences between groups. For binary outcomes, we will report pre- and post-  
15  
16  
17 310 intervention percentages for the intervention and control groups and adjusted odds  
18  
19 311 ratios (ORs) between groups. The 95% confidence intervals (CIs) and associated *P*-  
20  
21 312 values will be calculated. We will also examine whether the differences in the outcomes  
22  
23 313 between the control and intervention groups vary by the three regions (Beijing, Shanxi,  
24  
25 314 Xinjiang), the sex of children, socioeconomic status (mother's education), BMI status  
26  
27 315 at baseline and primary caregivers of the children (parents compared with non-parents).  
28  
29  
30  
31

### 316 *Process evaluation*

317 Based on the steps and principles described in the conceptual framework by Saunders  
318 et al.[25], we will identify the process evaluation elements including fidelity (the extent  
319 to which the intervention will be implemented as initially planned), dose delivered (the  
320 frequency and intensity of the actual implementation of the programme), dose received  
321 (the extent to which students/primary caregivers (parents in most cases)/teachers will  
322 be exposed to the intervention, as well as the degree of their satisfaction with the  
323 intervention and materials), reach (the proportions and the characteristics of  
324 students/primary caregivers/teachers completing or dropping out of the intervention)  
325 and context (family environment and school policies related to obesity prevention and  
326 management).

1  
2  
3  
4 327 The intervention process data collection procedure will include (1) direct regular field  
5  
6 328 observation and records which will be collected for the quality control of the  
7  
8  
9 329 intervention (e.g., quality and quantity of the intervention sessions and number of  
10  
11 330 students attending the lectures) and will be recorded by the trained project staff; (2) the  
12  
13  
14 331 user logs (e.g., frequency and duration) which will be collected by the smartphone app;  
15  
16  
17 332 (3) school policies related to obesity prevention and management, which will be  
18  
19 333 collected by the questionnaires (Table 3) in both the intervention and the control groups;  
20  
21  
22 334 and (4) interviews with participants (6~8 students per school) which will be conducted  
23  
24  
25 335 in both the intervention and the control groups.

### 27 336 *Health economics evaluation*

28  
29  
30 337 A cost-effectiveness analysis will be employed in the health economics evaluation, and  
31  
32 338 a societal perspective will be used to examine whether the intervention is economically  
33  
34  
35 339 feasible. Intervention costs will include hours spent by project staff, school staff, and  
36  
37  
38 340 students' primary caregivers (parents in most cases) for all the intervention activities  
39  
40  
41 341 and material expenses. Only the time spent by the project staff in implementing the  
42  
43 342 intervention will be included. Time costs will be based on personal employment  
44  
45 343 compensations if available or average compensations in the local areas for similar types  
46  
47  
48 344 of employees. Material expenses will be based on the actual purchasing prices. An  
49  
50  
51 345 incremental cost-effectiveness ratio will be calculated and a sensitivity analysis will be  
52  
53 346 used to vary key parameters to examine the robustness of the health economics results.

### 56 347 **Patient and Public involvement**

57  
58 348 We will conduct focus group discussions and interviews with key stakeholders  
59  
60



1  
2  
3  
4 349 (children, parents, teachers, school principals, local health, and education officials) by  
5  
6 350 refining the intervention approach. We will not involve any of the stakeholders in other  
7  
8  
9 351 aspects of the research study, including idea development, design of the study,  
10  
11 352 implementation of the protocol, data collection, and analysis and interpretation of the  
12  
13  
14 353 results. The results of the study will be disseminated through publication in peer-  
15  
16  
17 354 reviewed journals, presentations at conferences and in lay summaries provided to  
18  
19 355 school staff, students and parents. The benefits and burden of the intervention will be  
20  
21  
22 356 assessed by children and their primary caregivers through self-reported questionnaires  
23  
24  
25 357 at the end of the intervention.

## 26 27 358 **Trial status**

28  
29  
30 359 The trial started and the recruitment of schools and children was completed in  
31  
32 360 September 2018. Baseline measurements were conducted in the last few weeks in  
33  
34  
35 361 September 2018. The intervention lasting one school year started at the end of  
36  
37  
38 362 September 2018 and was completed in June 2019. The 4-month follow-up  
39  
40 363 measurements started and were completed in January 2019. The 9-month follow-up  
41  
42 364 measurements started and were completed in June 2019. The 21-month follow-up  
43  
44  
45 365 measurements will start and will be completed in June 2020.

## 46 47 48 366 **Ethics and dissemination**

49  
50 367 This study was reviewed and approved by the Peking University Institution Review  
51  
52 368 Board (IRB00001052-18021). Any amendments to the study protocol will be submitted  
53  
54  
55 369 for IRB approval prior to implementation. Written informed consent will be obtained  
56  
57  
58 370 from all students and their parents. All data collected will be entered into an electronic  
59  
60

1  
2  
3  
4 371 database with de-identified information. The database will be accessed only by  
5  
6 372 designated staff with a password. The results will be disseminated through publication  
7  
8  
9 373 in peer-reviewed journals, presentation at conferences and in lay summaries provided  
10  
11 374 to school staff and participants. Upon completion of the trial and after the publication  
12  
13  
14 375 of these results, the data will be made available upon request by contacting the  
15  
16  
17 376 corresponding author of this protocol.

## 19 377 **Discussion**

22 378 Non-communicable diseases, especially cardiovascular diseases, have contributed to  
23  
24 379 the public health burden worldwide. Preventing childhood obesity in early life may  
25  
26  
27 380 have the greatest long-term effects in curbing this widespread burden. Although several  
28  
29  
30 381 childhood obesity intervention studies have been conducted in China, research gaps  
31  
32 382 exist in terms of methodological flaws, process measures, and sustainability of the  
33  
34  
35 383 intervention. The DECIDE-Children study is based on theory-driven and systematic  
36  
37  
38 384 developments (e.g., systematic review [8], qualitative interviews, panel discussions and  
39  
40 385 a pilot study [15]) and serves as one of the first examples of a rigorously developed and  
41  
42  
43 386 evaluated childhood obesity prevention programme that will be implemented in eastern,  
44  
45  
46 387 central and western regions of China.

48 388 Our DECIDE-Children study can overcome poor adherence to the intervention  
49  
50 389 components, which is a weakness of most previous studies, due to our favourable  
51  
52  
53 390 collaborations with local education authorities as well as the rigorous quality control of  
54  
55  
56 391 implementing the intervention. This study also has several other distinguishing features:  
57  
58 392 1) randomization by an independent person not involved in the study, blinding of key  
59  
60

1  
2  
3  
4 393 outcome measures, and a detailed process evaluation plan will help to provide study  
5  
6 394 results of high quality; 2) a follow-up investigation will be conducted one year after the  
7  
8  
9 395 intervention is completed to determine the sustainability of the effects of the  
10  
11 396 intervention; 3) a smartphone app will be employed to assist in providing information  
12  
13  
14 397 on, monitoring and providing feedback on the behaviours and body weight of the  
15  
16  
17 398 children; 4) three centres located in eastern, central and western regions of China will  
18  
19 399 be involved in the study to reflect the different levels of economic development in  
20  
21  
22 400 China; and 5) most of the intervention components (school polices, regular monitoring  
23  
24  
25 401 of students' weight and height, reinforcement of students' physical activity at school,  
26  
27 402 health education activities for students) will be integrated into the regular academic  
28  
29  
30 403 schedule of each intervention school.  
31  
32  
33  
34  
35  
36  
37  
38  
39  
40  
41  
42  
43  
44  
45  
46  
47  
48  
49  
50  
51  
52  
53  
54  
55  
56  
57  
58  
59  
60

## References

1. Ng M, Fleming T, Robinson M, et al. Global, regional, and national prevalence of overweight and obesity in children and adults during 1980-2013: a systematic analysis for the Global Burden of Disease Study 2013. *Lancet*, 2014, 384: 766-781.
2. Wang S, Dong YH, Wang ZH, et al. Trends in overweight and obesity among Chinese children of 7-18 years old during 1985-2014. *Zhonghua Yu Fang Yi Xue Za Zhi*, 2017, 51: 300-305.
3. Booth JN, Tomporowski PD, Boyle JM, et al. Obesity impairs academic attainment in adolescence: findings from ALSPAC, a UK cohort. *Int J Obes (Lond)*, 2014, 38: 1335-1342.
4. Pulgaron ER. Childhood obesity: a review of increased risk for physical and psychological comorbidities. *Clin Ther*, 2013, 35: A18-32.
5. Twig G, Yaniv G, Levine H, et al. Body-mass index in 2.3 million adolescents and cardiovascular death in adulthood. *N Engl J Med*, 2016, 374: 2430-2440.
6. Gunnell DJ, Frankel SJ, Nanchahal K, et al. Childhood obesity and adult cardiovascular mortality: a 57-year follow-up study based on the Boyd Orr cohort. *Am J Clin Nutr*, 1998, 136: 664-672.
7. Bleich SN, Vercammen KA, Zatz LY, et al. Interventions to prevent global childhood overweight and obesity: a systematic review. *Lancet Diabetes Endocrinol*, 2018, 6: 332-346.
8. Feng L, Wei D-M, Lin S-T, et al. Systematic review and meta-analysis of

- 1  
2  
3  
4 school-based obesity interventions in mainland China. PLoS One, 2017, 12:  
5  
6 e0184704-e0184704.  
7  
8  
9 9. Li B, Liu WJ, Adab P, et al. Cluster-randomised controlled trial to assess the  
10  
11 effectiveness and cost-effectiveness of an obesity prevention programme for  
12  
13 Chinese primary school-aged children: the CHIRPY DRAGON study protocol.  
14  
15 BMJ Open, 2017, 7: e018415.  
16  
17  
18  
19 10. Wang Z, Xu F, Ye Q, et al. Childhood obesity prevention through a community-  
20  
21 based cluster randomized controlled physical activity intervention among  
22  
23 schools in china: the health legacy project of the 2nd world summer youth  
24  
25 olympic Games (YOG-Obesity study). Int J Obes (Lond), 2018, 42: 625-633.  
26  
27  
28  
29 11. Liu Z, Li Q, Maddison R, et al. A School-Based Comprehensive Intervention for  
30  
31 Childhood Obesity in China: A Cluster Randomized Controlled Trial. Child  
32  
33 Obes, 2019, 15(2): 105-15.  
34  
35  
36  
37 12. JaKa MM, Haapala JL, Trapl ES, et al. Reporting of treatment fidelity in  
38  
39 behavioural paediatric obesity intervention trials: a systematic review. Obes  
40  
41 Rev, 2016, 17(12): 1287-300.  
42  
43  
44  
45 13. Dong Y, Jan C, Ma Y, et al. Economic development and the nutritional status of  
46  
47 Chinese school-aged children and adolescents from 1995 to 2014: an analysis  
48  
49 of five successive national surveys. Lancet Diabetes Endocrinol, 2019, 7: 288-  
50  
51 299.  
52  
53  
54  
55 14. Yao H, Zhu G, Zhang X, et al. Current situation and analysis of school  
56  
57 physicians in primary and secondary schools in 16 provinces in China. Chin J  
58  
59  
60

- Sch Health, 2018, 39(10): 1455-8.
15. Lin L, Li C, Gao A, et al. Effect of a comprehensive school-based intervention on childhood obesity. *Chin J Sch Health*, 2018, 39: 1505-1508.
16. Chan AW, Tetzlaff JM, Altman DG, et al. SPIRIT 2013 statement: defining standard protocol items for clinical trials. *Ann Intern Med*, 2013, 158: 200-207.
17. Chan AW, Tetzlaff JM, Gotzsche PC, et al. SPIRIT 2013 explanation and elaboration: guidance for protocols of clinical trials. *BMJ*, 2013, 346: e7586.
18. Sallis J, Owen N, Fisher E. *Ecological models of health behavior*, in *Health behavior and Health Education*, Glanz K, Rimer B, and Viswanath K, Editors. 2008, Jossey-Bass, A Wiley Imprint: San Francisco, CA. p. 465-485.
19. Martin J, Chater A, Lorencatto F. Effective behavior change techniques in the prevention and management of childhood obesity. *Int J Obes*, 2013, 37:1287-94.
20. Hunsberger M, O'Malley J, Block T, et al. Relative validation of Block Kids Food Screener for dietary assessment in children and adolescents. *Matern Child Nutr*, 2015, 11: 260-270.
21. Liu AL, Ma GS, Zhang Q, et al. Reliability and validity of a 7-day physical activity questionnaire for elementary students. [Article in Chinese]. *Zhonghua Liu Xing Bing Xue Za Zhi*, 2003, 24: 901-904.
22. Wardle J, Guthrie CA, Sanderson S, et al. Development of the Children's Eating Behaviour Questionnaire. *J Child Psychol Psychiatry*, 2001, 42: 963-970.
23. de Onis M, Onyango A, Borghi E, Siyam A, Nishida C, Siekmann J.

1  
2  
3  
4 Development of a WHO growth reference for school-aged children and  
5 adolescents. Bull World Health Organ, 2007, 85: 660-667.  
6  
7

- 8  
9 24. National Health Commission of the People's Republic of China. Screening for  
10 overweight and obesity among school-age children and adolescents (WS/T 586-  
11 2018). Beijing, China; 2018.  
12  
13  
14  
15  
16  
17 25. Saunders RP, Evans MH, and Joshi P. Developing a process-evaluation plan for  
18 assessing health promotion program implementation: a how-to guide. Health  
19 promotion practice, 2005, 6: 134-147.  
20  
21  
22  
23  
24  
25  
26  
27  
28  
29  
30  
31  
32  
33  
34  
35  
36  
37  
38  
39  
40  
41  
42  
43  
44  
45  
46  
47  
48  
49  
50  
51  
52  
53  
54  
55  
56  
57  
58  
59  
60

**Authors' contributions**

HJW and YFW conceived the project. HJW, ZL, YFW, WYN and HJL were involved in design of the study and development of intervention materials. ZL wrote the first draft of the manuscript. XXF, YL, AYG and FZ contributed to implementation of the program. HF contributed to economic evaluation. PG contributed to statistical analysis plan. All authors approved the final manuscript.

For peer review only



## Acknowledgements

We thank Jun-Shi Chen, Li-Ming Wen, Jun Ma, Guan-Sheng Ma, Ke-Ji Li, Yan-Fang Wang, Zheng-Zhen Wang, Hong-Juan Li, Qian Zhang and Yao Zhao for their support and advice in the study design and intervention development. We also thank the children and their parents, school principals and teachers for their participation in the research. We thank China Mobile Research Institute for their help in development of the smartphone application.

### Study team of the DECIDE-Children study:

**Beijing:** Department of Maternal and Child Health, School of Public Health, Peking University (Hai-Jun Wang, Zheng Liu, Li-Zi Lin, Qiang Feng, Chen-Xiong Li, Shuang Zhou, Wen-Hao Li, Chu-Yao Jin, Qin Li, Yu Cheng, Di Wang, Lan Cheng, Yi Song, Hong Zhou, Xiang-Rong Xu, Jie-Yun Song); Dongcheng Primary and Secondary School Health Care Center, Beijing (Ai-Yu Gao, Hai-Hua Chen, Li-Jia Shang), Mentougou Primary and Secondary School Health Care Center, Beijing (Fang Zhang, Run-Ze Chen).

**Changzhi:** Changzhi Medical College (Xiang-Xian Feng, Jian-hui Yuan, Li-fen Duan).

**Urumqi:** Urumqi Primary and Secondary School Health Care Center, Xinjiang (Yi Lin, Chun-Xia Xu, Guo-Qin Yang, Zheng Zhang).

### Funding statement

This work was supported by National Key R&D Program of China (2016YFC1300200-4) and the China Postdoctoral Science Foundation (2019M650391).

1  
2  
3  
4  
5  
6  
7  
8  
9  
10  
11  
12  
13  
14  
15  
16  
17  
18  
19  
20  
21  
22  
23  
24  
25  
26  
27  
28  
29  
30  
31  
32  
33  
34  
35  
36  
37  
38  
39  
40  
41  
42  
43  
44  
45  
46  
47  
48  
49  
50  
51  
52  
53  
54  
55  
56  
57  
58  
59  
60

**Competing interests statement**

None.

For peer review only

**Table 1 Description of the intervention components implemented in the DECIDE-Children study**

| Intervention components                         | Descriptions of the content, frequency, and duration                                                                                                                                                                                                                                                                                                                                                                                                                                                                                                                                                                                                                                                                                                                                                                                                                                                                                                                                                                                                                                                                                                                                                                                                                                                    | Person responsible         |
|-------------------------------------------------|---------------------------------------------------------------------------------------------------------------------------------------------------------------------------------------------------------------------------------------------------------------------------------------------------------------------------------------------------------------------------------------------------------------------------------------------------------------------------------------------------------------------------------------------------------------------------------------------------------------------------------------------------------------------------------------------------------------------------------------------------------------------------------------------------------------------------------------------------------------------------------------------------------------------------------------------------------------------------------------------------------------------------------------------------------------------------------------------------------------------------------------------------------------------------------------------------------------------------------------------------------------------------------------------------------|----------------------------|
| <b>1. Student-focused activities</b>            |                                                                                                                                                                                                                                                                                                                                                                                                                                                                                                                                                                                                                                                                                                                                                                                                                                                                                                                                                                                                                                                                                                                                                                                                                                                                                                         |                            |
| <b>Health education activities for students</b> | <p><u>(1) Frequency and duration</u><br/>A total of ten activities (each lasting 40 minutes) will be provided once every two to three weeks (six activities will be arranged in the first semester, and four will be arranged in the second semester).</p> <p><u>(2) Different kinds of activities</u><br/>The ten activities will include seven health education lectures and three theme class meetings. The focus of the health education lectures will be on information diffusion, while the focus of theme class meetings will be on consolidation of the key messages learned in health education lectures through interactive and interesting group work (e.g., “Let me guess”).</p> <p><u>(3) Content</u><br/>1) Information diffusion<br/>Key messages will include the benefits of healthy weight, measurements and assessments of weight, and methods of achieving a healthy weight (not eating excessively; not drinking sugar-sweetened beverage; eating less high-energy food; less sedentary behaviours; performing more physical activity). Health education books and “nutrition evaluation turnplate for Chinese primary and middle school students” will be delivered to students. Health education messages will also be spread through posters on campus or in the classroom.</p> | The trained class teachers |

1  
2  
3  
4  
5  
6  
7  
8  
9  
10  
11  
12  
13  
14  
15  
16  
17  
18  
19  
20  
21  
22  
23  
24  
25  
26  
27  
28  
29  
30  
31  
32  
33  
34  
35  
36  
37  
38  
39  
40  
41  
42  
43  
44  
45  
46

|                                                                          |                                                                                                                                                                                                                                                                                                                                                                                                                                                                                                                                                                                                                                                                                                                                                                                                                                                                                                                                                                                                                        |                                                                                                                                                                                  |
|--------------------------------------------------------------------------|------------------------------------------------------------------------------------------------------------------------------------------------------------------------------------------------------------------------------------------------------------------------------------------------------------------------------------------------------------------------------------------------------------------------------------------------------------------------------------------------------------------------------------------------------------------------------------------------------------------------------------------------------------------------------------------------------------------------------------------------------------------------------------------------------------------------------------------------------------------------------------------------------------------------------------------------------------------------------------------------------------------------|----------------------------------------------------------------------------------------------------------------------------------------------------------------------------------|
|                                                                          | <p>2) Promotion for translating knowledge into action<br/> “Small hand in big hand” homework (e.g., “challenge of three days away from screen”) will be arranged at the end of each health education activity.</p> <p>3) Feedback and encouragement for BMI and behaviour change<br/> Feedback of regular monitoring results of students’ BMIs and behaviours will be provided in each health education activity. The students with good performance will be encouraged.</p>                                                                                                                                                                                                                                                                                                                                                                                                                                                                                                                                           |                                                                                                                                                                                  |
| <p><b>Reinforcement of students’ physical activity within school</b></p> | <p>1) Students will be instructed by physical education teachers to perform physical activities with moderate-to-vigorous intensity at school for at least one hour per school day (including physical education classes, class-break exercise, extracurricular activities). The aim of this component will be to improve the adherence to the Chinese national requirement for ‘One-Hour Physical Activity On Campus Every School Day’. If a school has met this requirement, no extra physical activities will be added at the school; otherwise, extra physical activities (i.e. physical education classes, exercises during breaks in class or extracurricular activities) will be added to the school schedule. The monitoring of the implementation of these extra physical activities will be continuous within the intervention period for the intervention group;</p> <p>2) Physical education teachers will be advised to teach students at least one sports game during each extracurricular activity.</p> | <p>The trained physical education teachers</p>                                                                                                                                   |
| <p><b>Regular monitoring of students’ weight and height</b></p>          | <p>1) <u>Monthly monitoring</u><br/> Students’ weight and height will be monitored monthly, and the data will then be input into the computer management system in a timely manner and shown in the smartphone app (described below);</p> <p>2) <u>Weekly monitoring</u></p>                                                                                                                                                                                                                                                                                                                                                                                                                                                                                                                                                                                                                                                                                                                                           | <p>The trained school doctors/health care teachers with the assistance of the trained project staff (for monthly monitoring);<br/> The trained project staff (for data input</p> |

|                                                                                  |                                                                                                                                                                                                                                                                                                                                                                                                                                                                                                                                                                                                                                                                                                                                                                                                                                                                                         |                                                            |
|----------------------------------------------------------------------------------|-----------------------------------------------------------------------------------------------------------------------------------------------------------------------------------------------------------------------------------------------------------------------------------------------------------------------------------------------------------------------------------------------------------------------------------------------------------------------------------------------------------------------------------------------------------------------------------------------------------------------------------------------------------------------------------------------------------------------------------------------------------------------------------------------------------------------------------------------------------------------------------------|------------------------------------------------------------|
|                                                                                  | Students' weight will be monitored weekly by the students themselves in the classroom.                                                                                                                                                                                                                                                                                                                                                                                                                                                                                                                                                                                                                                                                                                                                                                                                  | of monthly monitoring)<br>Students (for weekly monitoring) |
| <b>2. Activities towards parents (providing a supportive family environment)</b> |                                                                                                                                                                                                                                                                                                                                                                                                                                                                                                                                                                                                                                                                                                                                                                                                                                                                                         |                                                            |
| <b>Health education activities for parents</b>                                   | <p><u>1) Frequency and duration</u><br/>At least one activity (lasting for approximately 40-60 minutes) will be held at the beginning of each semester. One more activity will be held in the middle of the first semester. Another activity will also be held in the middle of the second semester if necessary (for example, if the fidelity of the data is unsatisfactory).</p> <p><u>2) Contents</u></p> <ul style="list-style-type: none"> <li>➤ For the first activity<br/>Key messages will be similar to those for the health education activities for students (described above). Parents will also be taught to use the smartphone app.</li> <li>➤ For other activities<br/>Project staff will provide feedback about students' weight status and behaviours to parents. Face-to-face group discussions will be established between the project staff and parents.</li> </ul> | The trained project staff                                  |
| <b>Reinforcement of students' physical activity outside school</b>               | <ol style="list-style-type: none"> <li>1) Parents will be instructed to supervise and encourage students to perform physical activities outside of school for 30 minutes per weekday and 1 hour per weekend day;</li> <li>2) Recommendations for physical activity outside of school will be provided through the smartphone app once every two months;</li> <li>3) Students will be encouraged to participate in sports games outside of school that will be taught by their physical education teachers during extracurricular activities.</li> </ol>                                                                                                                                                                                                                                                                                                                                 | Students' parents                                          |
| <b>3. Activities towards schools (providing a supportive school environment)</b> |                                                                                                                                                                                                                                                                                                                                                                                                                                                                                                                                                                                                                                                                                                                                                                                                                                                                                         |                                                            |

1  
2  
3  
4  
5  
6  
7  
8  
9  
10  
11  
12  
13  
14  
15  
16  
17  
18  
19  
20  
21  
22  
23  
24  
25  
26  
27  
28  
29  
30  
31  
32  
33  
34  
35  
36  
37  
38  
39  
40  
41  
42  
43  
44  
45  
46

|                                                                                  |                                                                                                                                                                                                                                                                                                                                                                                                                                                                                                                                                                                 |                                                                              |
|----------------------------------------------------------------------------------|---------------------------------------------------------------------------------------------------------------------------------------------------------------------------------------------------------------------------------------------------------------------------------------------------------------------------------------------------------------------------------------------------------------------------------------------------------------------------------------------------------------------------------------------------------------------------------|------------------------------------------------------------------------------|
| <p><b>School policies related to obesity prevention</b></p>                      | <p>The following school policies will be suggested:</p> <p>1) “Not selling”:<br/>Not selling unhealthy snacks<sup>1</sup> or sugar-sweetened beverages within school;</p> <p>2) “Not eating”:<br/>Telling students not to eat unhealthy snacks or drink sugar-sweetened beverages at school;</p> <p>3) “Not buying”:<br/>Students being educated by class teachers not to buy unhealthy snacks or sugar-sweetened beverages around school.</p>                                                                                                                                  | <p>The trained school principal;<br/>The trained class teachers</p>          |
| <p><b>Health education activities for school teachers</b></p>                    | <p><u>1) Frequency and duration</u><br/>The activity will be held once (lasting for approximately 40 minutes) in the first month of the intervention. School teachers participating in this programme at each school (school principal, class teachers, school doctors/health care teachers and physical education teachers) will be required to attend the activity.</p> <p><u>2) Content</u><br/>Key messages will be similar to those for the health education activities for students (described above). School teachers will also be taught to use the smartphone app.</p> | <p>The trained project staff</p>                                             |
| <p><b>4. A smartphone app assisted in implementation of the intervention</b></p> |                                                                                                                                                                                                                                                                                                                                                                                                                                                                                                                                                                                 |                                                                              |
| <p>The smartphone app (“Eat Wisely, Move</p>                                     | <p><u>1) Information diffusion (the behaviour change technique (BCT) used: providing information on consequences of behaviours)</u></p>                                                                                                                                                                                                                                                                                                                                                                                                                                         | <p>The smartphone app (installed by parents, school teachers and project</p> |

---

<sup>1</sup> “Healthy snacks” refer to dairy products, fresh vegetables or fruits and natural unprocessed nuts which are eaten at times other than at main meals. “Unhealthy snacks” refer to snacks other than the three kinds of healthy snacks.

|                  |                                                                                                                                                                                                                                                                                                                                                                                                                                                                                                                                                                                                                                                                                                                                                                                                                                                                                                                                                                                                                                                                                                                                                                                                                                                                                             |                                                                              |
|------------------|---------------------------------------------------------------------------------------------------------------------------------------------------------------------------------------------------------------------------------------------------------------------------------------------------------------------------------------------------------------------------------------------------------------------------------------------------------------------------------------------------------------------------------------------------------------------------------------------------------------------------------------------------------------------------------------------------------------------------------------------------------------------------------------------------------------------------------------------------------------------------------------------------------------------------------------------------------------------------------------------------------------------------------------------------------------------------------------------------------------------------------------------------------------------------------------------------------------------------------------------------------------------------------------------|------------------------------------------------------------------------------|
| <p>Happily”)</p> | <p>The smartphone app will provide information to parents, class teachers and project staff in accordance with the health education activities.</p> <p><u>2) Behaviour monitoring (the BCT used: prompting the self-monitoring of behaviours)</u></p> <p>Parents together with their children will be asked to record the diet and physical activity behaviours of students in the app weekly, and then they will receive individualized feedback related to these behaviours (described in Table 2).</p> <p><u>3) Weight management (the BCT used: prompting self-monitoring)</u></p> <p>According to the monthly monitoring of students’ weight and height (described above), parents, school teachers and project staff will view the recent weight status (categorized according to the BMI percentile criteria [24]), changes compared with previous records of the students and the individualized feedback related to weight management (described in Table 2).</p> <p><u>4) Assessment and feedback (the BCT used: providing feedback on performance)</u></p> <p>The smartphone app will also provide a synthetic and individualized assessment that will combine changes in the behaviours and weight status of the students. The four kinds of feedback are shown in Table 2.</p> | <p>staff) and the computer management system (utilized by project staff)</p> |
|------------------|---------------------------------------------------------------------------------------------------------------------------------------------------------------------------------------------------------------------------------------------------------------------------------------------------------------------------------------------------------------------------------------------------------------------------------------------------------------------------------------------------------------------------------------------------------------------------------------------------------------------------------------------------------------------------------------------------------------------------------------------------------------------------------------------------------------------------------------------------------------------------------------------------------------------------------------------------------------------------------------------------------------------------------------------------------------------------------------------------------------------------------------------------------------------------------------------------------------------------------------------------------------------------------------------|------------------------------------------------------------------------------|

**Table 2 The four kinds of regular evaluation feedback messages provided to all stakeholders by the smartphone mobile app on the basis of data from the regular monitoring of children’s weight, height and behaviours**

|                                                                                                               |                               | Results automatically judged according to the heights and weights measured at the regular monitoring intervals                                                                        |                                                                                                                                                                                                                                                                                                                     |
|---------------------------------------------------------------------------------------------------------------|-------------------------------|---------------------------------------------------------------------------------------------------------------------------------------------------------------------------------------|---------------------------------------------------------------------------------------------------------------------------------------------------------------------------------------------------------------------------------------------------------------------------------------------------------------------|
|                                                                                                               |                               | Positive results<br>(BMI decreases in students who are overweight or obese, or BMI increases in students who are underweight)                                                         | Negative results<br>(BMI increases in students who are overweight or obese, or BMI decreases in students who are underweight)                                                                                                                                                                                       |
| <b>Results automatically judged according to the diet and physical activity behaviours recorded regularly</b> | Full marks/<br>getting better | <b>Feedback 1:</b> “Your child is doing a great job. The weight changes are consistent with the changes in the diet and physical activity behaviours. Keep it up!”                    | <b>Feedback 2:</b> “Your child’s weight has not improved, but the diet and physical activity behaviours are good. It might be that weight improvement requires long-term adherence to a reasonable diet and physical activity behaviour, or that the behaviour records are inaccurate. Please continue to improve!” |
|                                                                                                               | Unchanged/<br>getting worse   | <b>Feedback 3:</b> “Your child has improved or maintained a healthy body weight, but there is still room for improvement in the diet and physical activity behaviours. Keep working!” | <b>Feedback 4:</b> “Your child’s weight has not improved, and the diet and physical activity behaviours also need improvement. Please continue to work hard!”                                                                                                                                                       |

1  
2  
3  
4  
5  
6  
7  
8  
9  
10  
11  
12  
13  
14  
15  
16  
17  
18  
19  
20  
21  
22  
23  
24  
25  
26  
27  
28  
29  
30  
31  
32  
33  
34  
35  
36  
37  
38  
39  
40  
41  
42  
43  
44  
45  
46



**Table 3 Outcome measurements for the DECIDE-Children study**

| Outcomes                               | Time     |                         |                         |                          | Device (Manufacturer, model)                                                                                 | Method                                        |
|----------------------------------------|----------|-------------------------|-------------------------|--------------------------|--------------------------------------------------------------------------------------------------------------|-----------------------------------------------|
|                                        | Baseline | 4 months after baseline | 9 months after baseline | 21 months after baseline |                                                                                                              |                                               |
| <b>Anthropometric measures</b>         |          |                         |                         |                          |                                                                                                              |                                               |
| Height                                 | √        | √                       | √                       | √                        | Stadiometer<br>(Huateng GMCS-1)                                                                              | Measured to the nearest 0.1 cm at least twice |
| Weight                                 | √        | √                       | √                       | √                        | Lever scale<br>(Wujin RGT-140)                                                                               | Measured to the nearest 0.1 kg at least twice |
| Waist circumference                    | √        | √                       | √                       | √                        | Tape<br>(MyoTape)                                                                                            | Measured to the nearest 0.1 cm at least twice |
| Hip circumference                      | √        | √                       | √                       | √                        | Tape<br>(MyoTape)                                                                                            | Measured to the nearest 0.1 cm at least twice |
| Systolic and diastolic blood pressures | √        | √                       | √                       | √                        | Electronic sphygmomanometer<br>(Omron HBP-1300)                                                              | Measured to the nearest 1 mmHg at least twice |
| Body fat percentage                    | √        |                         | √                       |                          | Body component instrument<br>(Tanita MC-780 MA)                                                              | According to the standard procedure           |
| <b>Physical fitness measures</b>       |          |                         |                         |                          |                                                                                                              |                                               |
| One-minute rope jumping                | √        |                         | √                       |                          | Physical fitness measures will be assessed by trained outcome assessors according to the standard procedure. |                                               |

1  
2  
3  
4  
5  
6  
7  
8  
9  
10  
11  
12  
13  
14  
15  
16  
17  
18  
19  
20  
21  
22  
23  
24  
25  
26  
27  
28  
29  
30  
31  
32  
33  
34  
35  
36  
37  
38  
39  
40  
41  
42  
43  
44  
45  
46

|                                                              |   |   |                                                                                                                                                                                                                                                                                                                                                                                                                                                                                                                                                                                                                                                                                                                                                                                                                                                                                                                                                                                                                            |
|--------------------------------------------------------------|---|---|----------------------------------------------------------------------------------------------------------------------------------------------------------------------------------------------------------------------------------------------------------------------------------------------------------------------------------------------------------------------------------------------------------------------------------------------------------------------------------------------------------------------------------------------------------------------------------------------------------------------------------------------------------------------------------------------------------------------------------------------------------------------------------------------------------------------------------------------------------------------------------------------------------------------------------------------------------------------------------------------------------------------------|
| One-minute sit-up                                            | √ | √ |                                                                                                                                                                                                                                                                                                                                                                                                                                                                                                                                                                                                                                                                                                                                                                                                                                                                                                                                                                                                                            |
| Long standing jump                                           | √ | √ |                                                                                                                                                                                                                                                                                                                                                                                                                                                                                                                                                                                                                                                                                                                                                                                                                                                                                                                                                                                                                            |
| Shuttle run (50 m×8)                                         | √ | √ |                                                                                                                                                                                                                                                                                                                                                                                                                                                                                                                                                                                                                                                                                                                                                                                                                                                                                                                                                                                                                            |
| <b>Behavioural measures and other measures</b>               |   |   |                                                                                                                                                                                                                                                                                                                                                                                                                                                                                                                                                                                                                                                                                                                                                                                                                                                                                                                                                                                                                            |
| Students' knowledge related to energy balance                | √ | √ | <p>We will use 8 items to assess the change in students' knowledge related to energy balance. For example, we will ask students, "Is it correct that drinking sugar-sweetened beverage cannot substitute drinking water ?" Three choices will be provided (right; wrong; not clear).</p> <p>Students should finish the questionnaires in the classroom in the presence of the trained outcome assessors, who can provide guidance and help.</p> <p>The questions were designed based on a validated 7-day physical activity questionnaire (PAQ; kappa values for test-retest results were 0.46~0.79 (different measures of activity), face validity and content validity were good based on experts' evaluations, and the correlations between the PAQ and Caltrac motion sensor data ranged from 0.38 to 0.46 (different measures of activity) for boys) [21].</p> <p>Students should finish the questionnaires in the classroom in the presence of the trained outcome assessors, who can provide guidance and help.</p> |
| Students' duration of moderate-to-vigorous physical activity | √ | √ | <p>We will use the "Children Eating Behaviour Questionnaire" (CEBQ) to assess students' eating behaviours, including their responsiveness to food and enjoyment of food. This 35-item instrument has been shown to have relatively</p>                                                                                                                                                                                                                                                                                                                                                                                                                                                                                                                                                                                                                                                                                                                                                                                     |

|    |                         |   |   |                                                                                 |
|----|-------------------------|---|---|---------------------------------------------------------------------------------|
| 1  |                         |   |   | good reliability [22].                                                          |
| 2  |                         |   |   | The questionnaires should be self-reported by parents or other primary          |
| 3  |                         |   |   | caregivers of the students.                                                     |
| 4  |                         |   |   | We will use a self-designed questionnaire to determine the average duration of  |
| 5  |                         |   |   | completing homework, watching television and playing electronic devices per     |
| 6  |                         |   |   | day during the last week.                                                       |
| 7  |                         |   |   | Students should finish the questionnaires in the classroom in the presence of   |
| 8  |                         |   |   | the trained outcome assessors, who can provide guidance and help.               |
| 9  |                         |   |   | The questionnaires should be filled by the trained investigators after face-to- |
| 10 |                         |   |   | face interviews with school principals, doctors/health care teachers and        |
| 11 | Students' sedentary     | √ | √ | physical education teachers.                                                    |
| 12 | behaviour               |   |   | We will use two items for the assessment. First, we will ask "Have you taken    |
| 13 |                         |   |   | action to reduce your weight during the last three months?" Yes/no choices      |
| 14 |                         |   |   | will be provided. In addition, we will ask "Do you currently intend to reduce   |
| 15 |                         |   |   | your weight?" Five choices ranging from "completely do not intend" to "intend   |
| 16 |                         |   |   | to very much" will be provided.                                                 |
| 17 | School policies for the |   |   | Students should finish the questionnaires in the classroom in the presence of   |
| 18 | prevention and          | √ | √ | the trained outcome assessors, who can provide guidance and help.               |
| 19 | management of           |   |   | The questionnaires should be filled by the trained investigators after face-to- |
| 20 | childhood obesity       |   |   | face interviews with school principals, doctors/health care teachers and        |
| 21 |                         |   |   | physical education teachers.                                                    |
| 22 |                         |   |   | We will use two items for the assessment. First, we will ask "Have you taken    |
| 23 |                         |   |   | action to reduce your weight during the last three months?" Yes/no choices      |
| 24 |                         |   |   | will be provided. In addition, we will ask "Do you currently intend to reduce   |
| 25 | Stage of readiness for  |   |   | your weight?" Five choices ranging from "completely do not intend" to "intend   |
| 26 | behaviour change        | √ | √ | to very much" will be provided.                                                 |
| 27 | related to weight       |   |   | Students should finish the questionnaires in the classroom in the presence of   |
| 28 | reduction               |   |   | the trained outcome assessors, who can provide guidance and help.               |
| 29 |                         |   |   |                                                                                 |
| 30 |                         |   |   |                                                                                 |
| 31 |                         |   |   |                                                                                 |
| 32 |                         |   |   |                                                                                 |
| 33 |                         |   |   |                                                                                 |
| 34 |                         |   |   |                                                                                 |
| 35 |                         |   |   |                                                                                 |
| 36 |                         |   |   |                                                                                 |
| 37 |                         |   |   |                                                                                 |
| 38 |                         |   |   |                                                                                 |
| 39 |                         |   |   |                                                                                 |
| 40 |                         |   |   |                                                                                 |
| 41 |                         |   |   |                                                                                 |
| 42 |                         |   |   |                                                                                 |
| 43 |                         |   |   |                                                                                 |
| 44 |                         |   |   |                                                                                 |
| 45 |                         |   |   |                                                                                 |
| 46 |                         |   |   |                                                                                 |

1  
2  
3  
4  
5  
6  
7  
8  
9  
10  
11  
12  
13  
14  
15  
16  
17  
18  
19  
20  
21  
22  
23  
24  
25  
26  
27  
28  
29  
30  
31  
32  
33  
34  
35  
36  
37  
38  
39  
40  
41  
42  
43  
44  
45  
46  
47  
48  
49  
50  
51  
52  
53  
54  
55  
56  
57  
58  
59  
60

Figure 1 Flow of the DECIDE-Children study

Figure 2 The Social Ecological Model as applied to the DECIDE-Children study

For peer review only

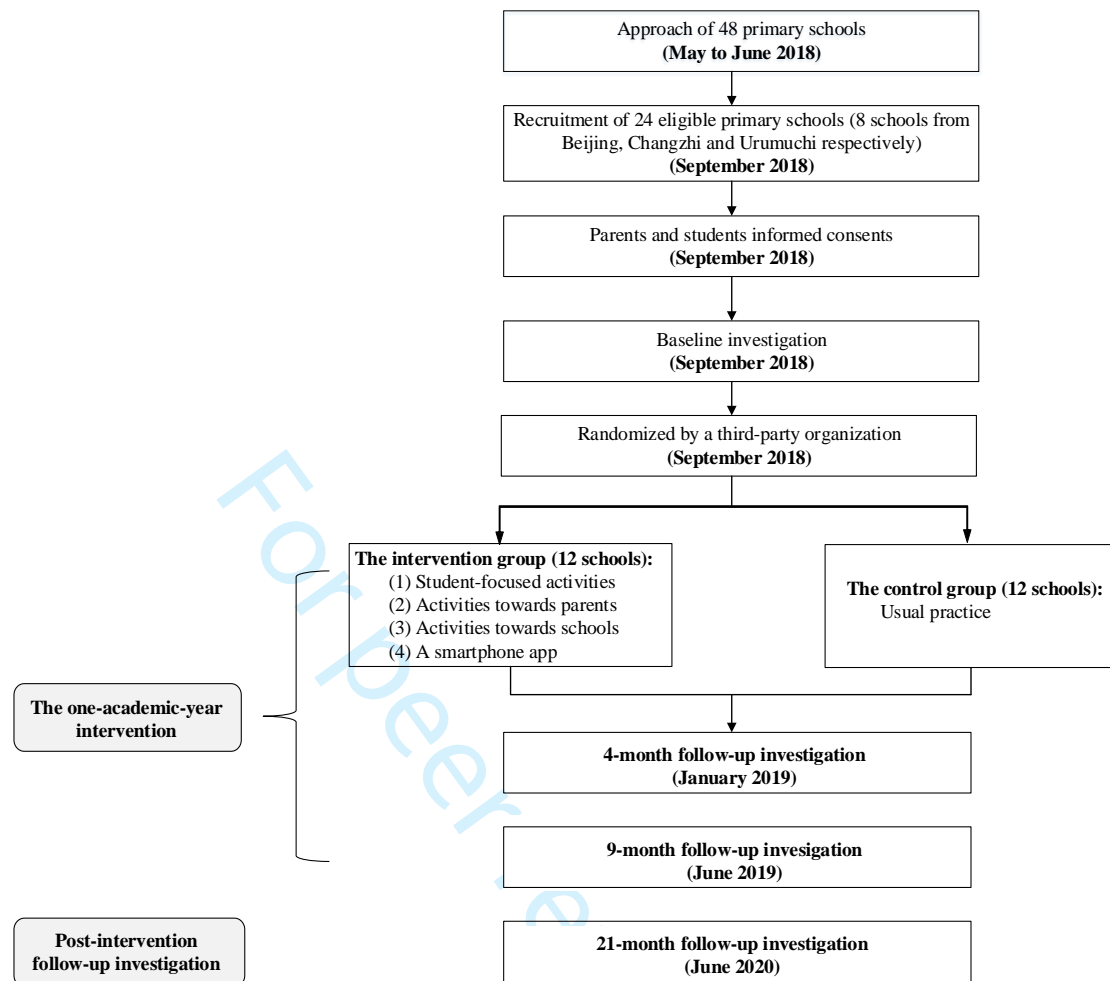

Figure 1 Flow of the DECIDE-Children study

1  
2  
3  
4  
5  
6  
7  
8  
9  
10  
11  
12  
13  
14  
15  
16  
17  
18  
19  
20  
21  
22  
23  
24  
25  
26  
27  
28  
29  
30  
31  
32  
33  
34  
35  
36  
37  
38  
39  
40  
41  
42  
43  
44  
45  
46

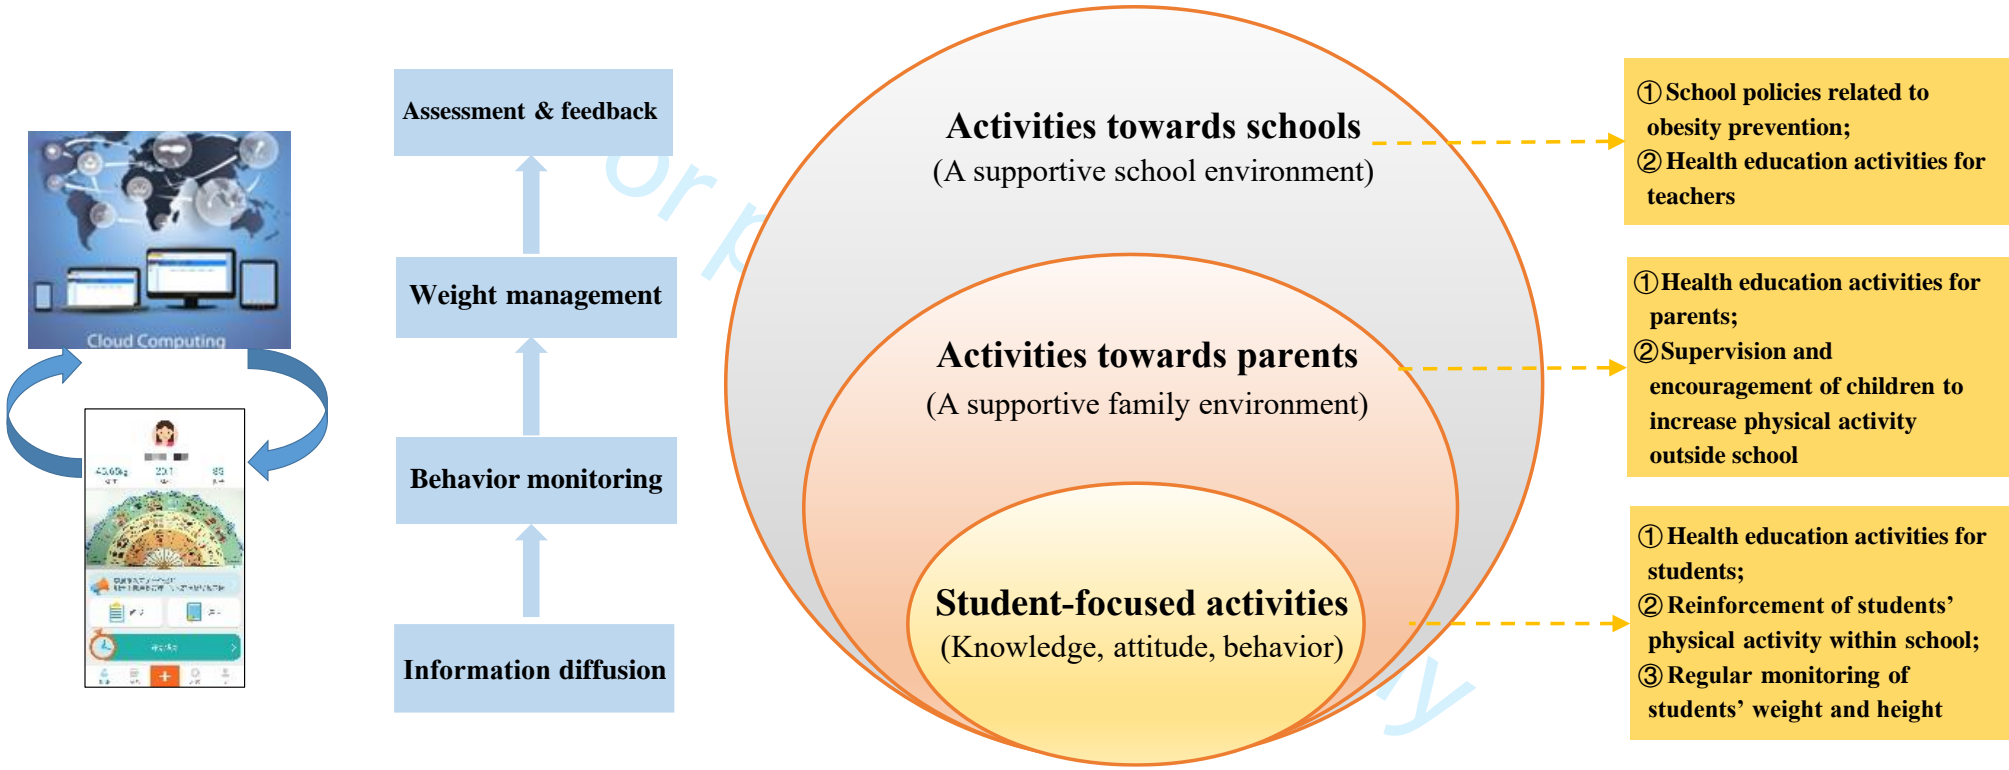

Figure 2 The Social Ecological Model as applied to the DECIDE-Children study

# Reporting checklist for protocol of a clinical trial.

Based on the SPIRIT guidelines.

## Instructions to authors

Complete this checklist by entering the page numbers from your manuscript where readers will find each of the items listed below.

Your article may not currently address all the items on the checklist. Please modify your text to include the missing information. If you are certain that an item does not apply, please write "n/a" and provide a short explanation.

Upload your completed checklist as an extra file when you submit to a journal.

In your methods section, say that you used the SPIRIT reporting guidelines, and cite them as:

Chan A-W, Tetzlaff JM, Altman DG, Laupacis A, Gøtzsche PC, Krleža-Jerić K, Hróbjartsson A, Mann H, Dickersin K, Berlin J, Doré C, Parulekar W, Summerskill W, Groves T, Schulz K, Sox H, Rockhold FW, Rennie D, Moher D. SPIRIT 2013 Statement: Defining standard protocol items for clinical trials. *Ann Intern Med.* 2013;158(3):200-207

|                    |                     | Reporting Item                                                                                               | Page Number |
|--------------------|---------------------|--------------------------------------------------------------------------------------------------------------|-------------|
| Title              | <a href="#">#1</a>  | Descriptive title identifying the study design, population, interventions, and, if applicable, trial acronym | 1           |
| Trial registration | <a href="#">#2a</a> | Trial identifier and registry name. If not yet registered, name of intended registry                         | 3           |

|    |                     |                     |                                            |                                |
|----|---------------------|---------------------|--------------------------------------------|--------------------------------|
| 1  | Trial registration: | <a href="#">#2b</a> | All items from the World Health            | This information is provided   |
| 2  |                     |                     |                                            |                                |
| 3  | data set            |                     | Organization Trial Registration Data Set   | in the trial registration      |
| 4  |                     |                     |                                            | website.                       |
| 5  |                     |                     |                                            |                                |
| 6  |                     |                     |                                            |                                |
| 7  |                     |                     |                                            |                                |
| 8  | Protocol version    | <a href="#">#3</a>  | Date and version identifier                | This information will be       |
| 9  |                     |                     |                                            | provided as soon as the        |
| 10 |                     |                     |                                            | manuscript revision is finally |
| 11 |                     |                     |                                            | completed.                     |
| 12 |                     |                     |                                            |                                |
| 13 |                     |                     |                                            |                                |
| 14 |                     |                     |                                            |                                |
| 15 |                     |                     |                                            |                                |
| 16 |                     |                     |                                            |                                |
| 17 |                     |                     |                                            |                                |
| 18 | Funding             | <a href="#">#4</a>  | Sources and types of financial, material,  | 25                             |
| 19 |                     |                     | and other support                          |                                |
| 20 |                     |                     |                                            |                                |
| 21 |                     |                     |                                            |                                |
| 22 |                     |                     |                                            |                                |
| 23 |                     |                     |                                            |                                |
| 24 | Roles and           | <a href="#">#5a</a> | Names, affiliations, and roles of protocol | 24-25                          |
| 25 | responsibilities:   |                     | contributors                               |                                |
| 26 |                     |                     |                                            |                                |
| 27 | contributorship     |                     |                                            |                                |
| 28 |                     |                     |                                            |                                |
| 29 |                     |                     |                                            |                                |
| 30 |                     |                     |                                            |                                |
| 31 | Roles and           | <a href="#">#5b</a> | Name and contact information for the       | n/a.                           |
| 32 | responsibilities:   |                     | trial sponsor                              |                                |
| 33 |                     |                     |                                            |                                |
| 34 | sponsor contact     |                     |                                            | This study was not             |
| 35 |                     |                     |                                            | sponsored by any individuals   |
| 36 |                     |                     |                                            | or companies. The funder       |
| 37 | information         |                     |                                            | name and number has been       |
| 38 |                     |                     |                                            | provided in Page 25.           |
| 39 |                     |                     |                                            |                                |
| 40 |                     |                     |                                            |                                |
| 41 |                     |                     |                                            |                                |
| 42 |                     |                     |                                            |                                |
| 43 |                     |                     |                                            |                                |
| 44 |                     |                     |                                            |                                |
| 45 |                     |                     |                                            |                                |
| 46 |                     |                     |                                            |                                |
| 47 | Roles and           | <a href="#">#5c</a> | Role of study sponsor and funders, if      | 26                             |
| 48 | responsibilities:   |                     | any, in study design; collection,          |                                |
| 49 |                     |                     | management, analysis, and                  |                                |
| 50 | sponsor and         |                     | interpretation of data; writing of the     |                                |
| 51 |                     |                     | report; and the decision to submit the     |                                |
| 52 | funder              |                     |                                            |                                |
| 53 |                     |                     |                                            |                                |
| 54 |                     |                     |                                            |                                |
| 55 |                     |                     |                                            |                                |
| 56 |                     |                     |                                            |                                |
| 57 |                     |                     |                                            |                                |
| 58 |                     |                     |                                            |                                |
| 59 |                     |                     |                                            |                                |
| 60 |                     |                     |                                            |                                |



report for publication, including whether they will have ultimate authority over any of these activities

|    |                   |                     |                                             |     |
|----|-------------------|---------------------|---------------------------------------------|-----|
| 1  |                   |                     |                                             |     |
| 2  |                   |                     |                                             |     |
| 3  |                   |                     |                                             |     |
| 4  |                   |                     |                                             |     |
| 5  |                   |                     |                                             |     |
| 6  |                   |                     |                                             |     |
| 7  |                   |                     |                                             |     |
| 8  | Roles and         | <a href="#">#5d</a> | Composition, roles, and responsibilities    | 25  |
| 9  | responsibilities: |                     | of the coordinating centre, steering        |     |
| 10 |                   |                     | committee, endpoint adjudication            |     |
| 11 | committees        |                     | committee, data management team,            |     |
| 12 |                   |                     | and other individuals or groups             |     |
| 13 |                   |                     | overseeing the trial, if applicable (see    |     |
| 14 |                   |                     | Item 21a for data monitoring committee)     |     |
| 15 |                   |                     |                                             |     |
| 16 |                   |                     |                                             |     |
| 17 |                   |                     |                                             |     |
| 18 |                   |                     |                                             |     |
| 19 |                   |                     |                                             |     |
| 20 |                   |                     |                                             |     |
| 21 |                   |                     |                                             |     |
| 22 |                   |                     |                                             |     |
| 23 |                   |                     |                                             |     |
| 24 | Background and    | <a href="#">#6a</a> | Description of research question and        | 5-7 |
| 25 | rationale         |                     | justification for undertaking the trial,    |     |
| 26 |                   |                     | including summary of relevant studies       |     |
| 27 |                   |                     | (published and unpublished) examining       |     |
| 28 |                   |                     | benefits and harms for each intervention    |     |
| 29 |                   |                     |                                             |     |
| 30 |                   |                     |                                             |     |
| 31 |                   |                     |                                             |     |
| 32 |                   |                     |                                             |     |
| 33 |                   |                     |                                             |     |
| 34 |                   |                     |                                             |     |
| 35 |                   |                     |                                             |     |
| 36 |                   |                     |                                             |     |
| 37 | Background and    | <a href="#">#6b</a> | Explanation for choice of comparators       | 6   |
| 38 | rationale: choice |                     |                                             |     |
| 39 | of comparators    |                     |                                             |     |
| 40 |                   |                     |                                             |     |
| 41 |                   |                     |                                             |     |
| 42 |                   |                     |                                             |     |
| 43 |                   |                     |                                             |     |
| 44 | Objectives        | <a href="#">#7</a>  | Specific objectives or hypotheses           | 7   |
| 45 |                   |                     |                                             |     |
| 46 |                   |                     |                                             |     |
| 47 | Trial design      | <a href="#">#8</a>  | Description of trial design including type  | 8   |
| 48 |                   |                     | of trial (eg, parallel group, crossover,    |     |
| 49 |                   |                     | factorial, single group), allocation ratio, |     |
| 50 |                   |                     | and framework (eg, superiority,             |     |
| 51 |                   |                     | equivalence, non-inferiority, exploratory)  |     |
| 52 |                   |                     |                                             |     |
| 53 |                   |                     |                                             |     |
| 54 |                   |                     |                                             |     |
| 55 |                   |                     |                                             |     |
| 56 |                   |                     |                                             |     |
| 57 |                   |                     |                                             |     |
| 58 |                   |                     |                                             |     |
| 59 |                   |                     |                                             |     |
| 60 |                   |                     |                                             |     |

|                                                                                                                                                          |                                 |                      |                                                                                                                                                                                                  |                                                                                                                                                                                                                              |
|----------------------------------------------------------------------------------------------------------------------------------------------------------|---------------------------------|----------------------|--------------------------------------------------------------------------------------------------------------------------------------------------------------------------------------------------|------------------------------------------------------------------------------------------------------------------------------------------------------------------------------------------------------------------------------|
| 1<br>2<br>3<br>4<br>5<br>6<br>7<br>8<br>9<br>10<br>11<br>12                                                                                              | Study setting                   | <a href="#">#9</a>   | Description of study settings (eg, community clinic, academic hospital) and list of countries where data will be collected. Reference to where list of study sites can be obtained               | 8                                                                                                                                                                                                                            |
| 13<br>14<br>15<br>16<br>17<br>18<br>19<br>20<br>21<br>22<br>23<br>24                                                                                     | Eligibility criteria            | <a href="#">#10</a>  | Inclusion and exclusion criteria for participants. If applicable, eligibility criteria for study centres and individuals who will perform the interventions (eg, surgeons, psychotherapists)     | 9-10                                                                                                                                                                                                                         |
| 25<br>26<br>27<br>28<br>29<br>30<br>31<br>32<br>33<br>34                                                                                                 | Interventions:<br>description   | <a href="#">#11a</a> | Interventions for each group with sufficient detail to allow replication, including how and when they will be administered                                                                       | 11, Table 1-2                                                                                                                                                                                                                |
| 35<br>36<br>37<br>38<br>39<br>40<br>41<br>42<br>43<br>44<br>45<br>46<br>47<br>48<br>49<br>50<br>51<br>52<br>53<br>54<br>55<br>56<br>57<br>58<br>59<br>60 | Interventions:<br>modifications | <a href="#">#11b</a> | Criteria for discontinuing or modifying allocated interventions for a given trial participant (eg, drug dose change in response to harms, participant request, or improving / worsening disease) | n/a.<br><br>This is a childhood obesity prevention intervention. Based on our previous experiences, it is less likely that discontinuing or modifying allocated interventions for a given trial participant will take place. |

|    |                  |                      |                                            |                                |
|----|------------------|----------------------|--------------------------------------------|--------------------------------|
| 1  | Interventions:   | <a href="#">#11c</a> | Strategies to improve adherence to         | 11-12                          |
| 2  |                  |                      |                                            |                                |
| 3  | adherence        |                      | intervention protocols, and any            |                                |
| 4  |                  |                      |                                            |                                |
| 5  |                  |                      | procedures for monitoring adherence        |                                |
| 6  |                  |                      |                                            |                                |
| 7  |                  |                      | (eg, drug tablet return; laboratory tests) |                                |
| 8  |                  |                      |                                            |                                |
| 9  |                  |                      |                                            |                                |
| 10 |                  |                      |                                            |                                |
| 11 | Interventions:   | <a href="#">#11d</a> | Relevant concomitant care and              | n/a.                           |
| 12 |                  |                      |                                            |                                |
| 13 | concomitant care |                      | interventions that are permitted or        | This is a childhood obesity    |
| 14 |                  |                      |                                            | prevention intervention.       |
| 15 |                  |                      | prohibited during the trial                | Based on our previous          |
| 16 |                  |                      |                                            | experiences, it is less likely |
| 17 |                  |                      |                                            | that concomitant care and      |
| 18 |                  |                      |                                            | interventions will take place. |
| 19 |                  |                      |                                            |                                |
| 20 |                  |                      |                                            |                                |
| 21 |                  |                      |                                            |                                |
| 22 |                  |                      |                                            |                                |
| 23 |                  |                      |                                            |                                |
| 24 |                  |                      |                                            |                                |
| 25 |                  |                      |                                            |                                |
| 26 |                  |                      |                                            |                                |
| 27 |                  |                      |                                            |                                |
| 28 | Outcomes         | <a href="#">#12</a>  | Primary, secondary, and other              | 13-14, Table 3                 |
| 29 |                  |                      |                                            |                                |
| 30 |                  |                      | outcomes, including the specific           |                                |
| 31 |                  |                      |                                            |                                |
| 32 |                  |                      | measurement variable (eg, systolic         |                                |
| 33 |                  |                      |                                            |                                |
| 34 |                  |                      | blood pressure), analysis metric (eg,      |                                |
| 35 |                  |                      |                                            |                                |
| 36 |                  |                      | change from baseline, final value, time    |                                |
| 37 |                  |                      |                                            |                                |
| 38 |                  |                      | to event), method of aggregation (eg,      |                                |
| 39 |                  |                      |                                            |                                |
| 40 |                  |                      | median, proportion), and time point for    |                                |
| 41 |                  |                      |                                            |                                |
| 42 |                  |                      | each outcome. Explanation of the           |                                |
| 43 |                  |                      |                                            |                                |
| 44 |                  |                      | clinical relevance of chosen efficacy and  |                                |
| 45 |                  |                      |                                            |                                |
| 46 |                  |                      | harm outcomes is strongly                  |                                |
| 47 |                  |                      |                                            |                                |
| 48 |                  |                      | recommended                                |                                |
| 49 |                  |                      |                                            |                                |
| 50 |                  |                      |                                            |                                |
| 51 |                  |                      |                                            |                                |
| 52 |                  |                      |                                            |                                |
| 53 |                  |                      |                                            |                                |
| 54 | Participant      | <a href="#">#13</a>  | Time schedule of enrolment,                | Figure 1                       |
| 55 |                  |                      |                                            |                                |
| 56 | timeline         |                      | interventions (including any run-ins and   |                                |
| 57 |                  |                      |                                            |                                |
| 58 |                  |                      |                                            |                                |
| 59 |                  |                      |                                            |                                |
| 60 |                  |                      |                                            |                                |

washouts), assessments, and visits for participants. A schematic diagram is highly recommended (see Figure)

|    |             |                      |                                           |      |
|----|-------------|----------------------|-------------------------------------------|------|
| 1  |             |                      |                                           |      |
| 2  |             |                      |                                           |      |
| 3  |             |                      |                                           |      |
| 4  |             |                      |                                           |      |
| 5  |             |                      |                                           |      |
| 6  |             |                      |                                           |      |
| 7  |             |                      |                                           |      |
| 8  | Sample size | <a href="#">#14</a>  | Estimated number of participants          | 14   |
| 9  |             |                      |                                           |      |
| 10 |             |                      | needed to achieve study objectives and    |      |
| 11 |             |                      |                                           |      |
| 12 |             |                      | how it was determined, including clinical |      |
| 13 |             |                      |                                           |      |
| 14 |             |                      | and statistical assumptions supporting    |      |
| 15 |             |                      | any sample size calculations              |      |
| 16 |             |                      |                                           |      |
| 17 |             |                      |                                           |      |
| 18 |             |                      |                                           |      |
| 19 |             |                      |                                           |      |
| 20 | Recruitment | <a href="#">#15</a>  | Strategies for achieving adequate         | 9-10 |
| 21 |             |                      |                                           |      |
| 22 |             |                      | participant enrolment to reach target     |      |
| 23 |             |                      |                                           |      |
| 24 |             |                      | sample size                               |      |
| 25 |             |                      |                                           |      |
| 26 |             |                      |                                           |      |
| 27 |             |                      |                                           |      |
| 28 | Allocation: | <a href="#">#16a</a> | Method of generating the allocation       | 10   |
| 29 |             |                      |                                           |      |
| 30 | sequence    |                      | sequence (eg, computer-generated          |      |
| 31 |             |                      |                                           |      |
| 32 | generation  |                      | random numbers), and list of any          |      |
| 33 |             |                      |                                           |      |
| 34 |             |                      | factors for stratification. To reduce     |      |
| 35 |             |                      | predictability of a random sequence,      |      |
| 36 |             |                      |                                           |      |
| 37 |             |                      | details of any planned restriction (eg,   |      |
| 38 |             |                      |                                           |      |
| 39 |             |                      | blocking) should be provided in a         |      |
| 40 |             |                      |                                           |      |
| 41 |             |                      | separate document that is unavailable     |      |
| 42 |             |                      |                                           |      |
| 43 |             |                      | to those who enrol participants or        |      |
| 44 |             |                      |                                           |      |
| 45 |             |                      | assign interventions                      |      |
| 46 |             |                      |                                           |      |
| 47 |             |                      |                                           |      |
| 48 |             |                      |                                           |      |
| 49 |             |                      |                                           |      |
| 50 |             |                      |                                           |      |
| 51 | Allocation  | <a href="#">#16b</a> | Mechanism of implementing the             | 10   |
| 52 |             |                      |                                           |      |
| 53 | concealment |                      | allocation sequence (eg, central          |      |
| 54 |             |                      |                                           |      |
| 55 | mechanism   |                      | telephone; sequentially numbered,         |      |
| 56 |             |                      |                                           |      |
| 57 |             |                      | opaque, sealed envelopes), describing     |      |
| 58 |             |                      |                                           |      |
| 59 |             |                      |                                           |      |
| 60 |             |                      |                                           |      |

|    |                    |                                                              |                                   |
|----|--------------------|--------------------------------------------------------------|-----------------------------------|
| 1  |                    | any steps to conceal the sequence until                      |                                   |
| 2  |                    |                                                              |                                   |
| 3  |                    | interventions are assigned                                   |                                   |
| 4  |                    |                                                              |                                   |
| 5  |                    |                                                              |                                   |
| 6  | Allocation:        | <a href="#">#16c</a> Who will generate the allocation        | 9-10                              |
| 7  |                    |                                                              |                                   |
| 8  | implementation     | sequence, who will enrol participants,                       |                                   |
| 9  |                    |                                                              |                                   |
| 10 |                    | and who will assign participants to                          |                                   |
| 11 |                    |                                                              |                                   |
| 12 |                    | interventions                                                |                                   |
| 13 |                    |                                                              |                                   |
| 14 |                    |                                                              |                                   |
| 15 |                    |                                                              |                                   |
| 16 | Blinding (masking) | <a href="#">#17a</a> Who will be blinded after assignment to | 13                                |
| 17 |                    |                                                              |                                   |
| 18 |                    | interventions (eg, trial participants, care                  |                                   |
| 19 |                    |                                                              |                                   |
| 20 |                    | providers, outcome assessors, data                           |                                   |
| 21 |                    |                                                              |                                   |
| 22 |                    | analysts), and how                                           |                                   |
| 23 |                    |                                                              |                                   |
| 24 |                    |                                                              |                                   |
| 25 |                    |                                                              |                                   |
| 26 | Blinding           | <a href="#">#17b</a> If blinded, circumstances under which   | n/a.                              |
| 27 |                    |                                                              |                                   |
| 28 | (masking):         | unblinding is permissible, and                               | The assessors measuring           |
| 29 |                    |                                                              | students' height and weight will  |
| 30 | emergency          | procedure for revealing a participant's                      | be blinded to group allocation of |
| 31 |                    |                                                              | the schools. We did not           |
| 32 | unblinding         | allocated intervention during the trial                      | anticipate any necessary          |
| 33 |                    |                                                              | circumstances when unblinding     |
| 34 |                    |                                                              | is permissible.                   |
| 35 |                    |                                                              |                                   |
| 36 |                    |                                                              |                                   |
| 37 |                    |                                                              |                                   |
| 38 |                    |                                                              |                                   |
| 39 |                    |                                                              |                                   |
| 40 | Data collection    | <a href="#">#18a</a> Plans for assessment and collection of  | 13                                |
| 41 |                    |                                                              |                                   |
| 42 | plan               | outcome, baseline, and other trial data,                     |                                   |
| 43 |                    |                                                              |                                   |
| 44 |                    | including any related processes to                           |                                   |
| 45 |                    |                                                              |                                   |
| 46 |                    | promote data quality (eg, duplicate                          |                                   |
| 47 |                    |                                                              |                                   |
| 48 |                    | measurements, training of assessors)                         |                                   |
| 49 |                    |                                                              |                                   |
| 50 |                    | and a description of study instruments                       |                                   |
| 51 |                    |                                                              |                                   |
| 52 |                    | (eg, questionnaires, laboratory tests)                       |                                   |
| 53 |                    |                                                              |                                   |
| 54 |                    | along with their reliability and validity, if                |                                   |
| 55 |                    |                                                              |                                   |
| 56 |                    | known. Reference to where data                               |                                   |
| 57 |                    |                                                              |                                   |
| 58 |                    |                                                              |                                   |
| 59 |                    |                                                              |                                   |
| 60 |                    |                                                              |                                   |

|    |                 |                                                             |    |
|----|-----------------|-------------------------------------------------------------|----|
| 1  |                 | collection forms can be found, if not in                    |    |
| 2  |                 |                                                             |    |
| 3  |                 | the protocol                                                |    |
| 4  |                 |                                                             |    |
| 5  |                 |                                                             |    |
| 6  | Data collection | <a href="#">#18b</a> Plans to promote participant retention | 15 |
| 7  |                 |                                                             |    |
| 8  | plan: retention | and complete follow-up, including list of                   |    |
| 9  |                 |                                                             |    |
| 10 |                 | any outcome data to be collected for                        |    |
| 11 |                 |                                                             |    |
| 12 |                 | participants who discontinue or deviate                     |    |
| 13 |                 |                                                             |    |
| 14 |                 | from intervention protocols                                 |    |
| 15 |                 |                                                             |    |
| 16 |                 |                                                             |    |
| 17 |                 |                                                             |    |
| 18 | Data management | <a href="#">#19</a> Plans for data entry, coding, security, | 3  |
| 19 |                 |                                                             |    |
| 20 |                 | and storage, including any related                          |    |
| 21 |                 |                                                             |    |
| 22 |                 | processes to promote data quality (eg,                      |    |
| 23 |                 |                                                             |    |
| 24 |                 | double data entry; range checks for                         |    |
| 25 |                 |                                                             |    |
| 26 |                 | data values). Reference to where                            |    |
| 27 |                 |                                                             |    |
| 28 |                 | details of data management procedures                       |    |
| 29 |                 |                                                             |    |
| 30 |                 | can be found, if not in the protocol                        |    |
| 31 |                 |                                                             |    |
| 32 |                 |                                                             |    |
| 33 |                 |                                                             |    |
| 34 | Statistics:     | <a href="#">#20a</a> Statistical methods for analysing      | 15 |
| 35 |                 |                                                             |    |
| 36 | outcomes        | primary and secondary outcomes.                             |    |
| 37 |                 |                                                             |    |
| 38 |                 | Reference to where other details of the                     |    |
| 39 |                 |                                                             |    |
| 40 |                 | statistical analysis plan can be found, if                  |    |
| 41 |                 |                                                             |    |
| 42 |                 | not in the protocol                                         |    |
| 43 |                 |                                                             |    |
| 44 |                 |                                                             |    |
| 45 |                 |                                                             |    |
| 46 | Statistics:     | <a href="#">#20b</a> Methods for any additional analyses    | 15 |
| 47 |                 |                                                             |    |
| 48 | additional      | (eg, subgroup and adjusted analyses)                        |    |
| 49 |                 |                                                             |    |
| 50 | analyses        |                                                             |    |
| 51 |                 |                                                             |    |
| 52 |                 |                                                             |    |
| 53 |                 |                                                             |    |
| 54 |                 |                                                             |    |
| 55 |                 |                                                             |    |
| 56 |                 |                                                             |    |
| 57 |                 |                                                             |    |
| 58 |                 |                                                             |    |
| 59 |                 |                                                             |    |
| 60 |                 |                                                             |    |

|    |                      |                      |                                            |                                |
|----|----------------------|----------------------|--------------------------------------------|--------------------------------|
| 1  | Statistics: analysis | <a href="#">#20c</a> | Definition of analysis population relating | 15                             |
| 2  |                      |                      |                                            |                                |
| 3  | population and       |                      | to protocol non-adherence (eg, as          |                                |
| 4  |                      |                      |                                            |                                |
| 5  | missing data         |                      | randomised analysis), and any              |                                |
| 6  |                      |                      |                                            |                                |
| 7  |                      |                      | statistical methods to handle missing      |                                |
| 8  |                      |                      |                                            |                                |
| 9  |                      |                      | data (eg, multiple imputation)             |                                |
| 10 |                      |                      |                                            |                                |
| 11 |                      |                      |                                            |                                |
| 12 |                      |                      |                                            |                                |
| 13 | Data monitoring:     | <a href="#">#21a</a> | Composition of data monitoring             | 18                             |
| 14 |                      |                      |                                            |                                |
| 15 | formal committee     |                      | committee (DMC); summary of its role       |                                |
| 16 |                      |                      |                                            |                                |
| 17 |                      |                      | and reporting structure; statement of      |                                |
| 18 |                      |                      |                                            |                                |
| 19 |                      |                      | whether it is independent from the         |                                |
| 20 |                      |                      |                                            |                                |
| 21 |                      |                      | sponsor and competing interests; and       |                                |
| 22 |                      |                      |                                            |                                |
| 23 |                      |                      | reference to where further details about   |                                |
| 24 |                      |                      |                                            |                                |
| 25 |                      |                      | its charter can be found, if not in the    |                                |
| 26 |                      |                      |                                            |                                |
| 27 |                      |                      | protocol. Alternatively, an explanation of |                                |
| 28 |                      |                      |                                            |                                |
| 29 |                      |                      | why a DMC is not needed                    |                                |
| 30 |                      |                      |                                            |                                |
| 31 |                      |                      |                                            |                                |
| 32 |                      |                      |                                            |                                |
| 33 |                      |                      |                                            |                                |
| 34 | Data monitoring:     | <a href="#">#21b</a> | Description of any interim analyses and    | n/a.                           |
| 35 |                      |                      |                                            |                                |
| 36 | interim analysis     |                      | stopping guidelines, including who will    |                                |
| 37 |                      |                      |                                            |                                |
| 38 |                      |                      | have access to these interim results and   | This is a childhood obesity    |
| 39 |                      |                      |                                            | prevention intervention.       |
| 40 |                      |                      | make the final decision to terminate the   |                                |
| 41 |                      |                      |                                            | Based on our previous          |
| 42 |                      |                      | trial                                      | experiences, it is less likely |
| 43 |                      |                      |                                            | that discontinuing             |
| 44 |                      |                      |                                            | interventions will take place. |
| 45 |                      |                      |                                            |                                |
| 46 |                      |                      |                                            |                                |
| 47 |                      |                      |                                            |                                |
| 48 |                      |                      |                                            |                                |
| 49 |                      |                      |                                            |                                |
| 50 |                      |                      |                                            |                                |
| 51 |                      |                      |                                            |                                |
| 52 | Harms                | <a href="#">#22</a>  | Plans for collecting, assessing,           | 16 (we will use                |
| 53 |                      |                      |                                            |                                |
| 54 |                      |                      | reporting, and managing solicited and      | questionnaires to collect and  |
| 55 |                      |                      |                                            |                                |
| 56 |                      |                      | spontaneously reported adverse events      |                                |
| 57 |                      |                      |                                            |                                |
| 58 |                      |                      |                                            |                                |
| 59 |                      |                      |                                            |                                |
| 60 |                      |                      |                                            |                                |

|    |                   |                      |                                             |                                 |
|----|-------------------|----------------------|---------------------------------------------|---------------------------------|
| 1  |                   |                      | and other unintended effects of trial       | assess any adverse events       |
| 2  |                   |                      |                                             |                                 |
| 3  |                   |                      | interventions or trial conduct              | or other process data)          |
| 4  |                   |                      |                                             |                                 |
| 5  |                   |                      |                                             |                                 |
| 6  | Auditing          | <a href="#">#23</a>  | Frequency and procedures for auditing       | 7 (This study is one of the     |
| 7  |                   |                      | trial conduct, if any, and whether the      | five independent studies of     |
| 8  |                   |                      | process will be independent from            | the overall DECIDE project.     |
| 9  |                   |                      |                                             |                                 |
| 10 |                   |                      | investigators and the sponsor               | This overall project is audited |
| 11 |                   |                      |                                             | by the funder (National Key     |
| 12 |                   |                      |                                             | R&D Program of China).          |
| 13 |                   |                      |                                             |                                 |
| 14 |                   |                      |                                             |                                 |
| 15 |                   |                      |                                             |                                 |
| 16 |                   |                      |                                             |                                 |
| 17 |                   |                      |                                             |                                 |
| 18 |                   |                      |                                             |                                 |
| 19 |                   |                      |                                             |                                 |
| 20 | Research ethics   | <a href="#">#24</a>  | Plans for seeking research ethics           | 2-3                             |
| 21 |                   |                      |                                             |                                 |
| 22 | approval          |                      | committee / institutional review board      |                                 |
| 23 |                   |                      |                                             |                                 |
| 24 |                   |                      | (REC / IRB) approval                        |                                 |
| 25 |                   |                      |                                             |                                 |
| 26 |                   |                      |                                             |                                 |
| 27 |                   |                      |                                             |                                 |
| 28 | Protocol          | <a href="#">#25</a>  | Plans for communicating important           | 2-3                             |
| 29 |                   |                      |                                             |                                 |
| 30 | amendments        |                      | protocol modifications (eg, changes to      |                                 |
| 31 |                   |                      | eligibility criteria, outcomes, analyses)   |                                 |
| 32 |                   |                      | to relevant parties (eg, investigators,     |                                 |
| 33 |                   |                      | REC / IRBs, trial participants, trial       |                                 |
| 34 |                   |                      | registries, journals, regulators)           |                                 |
| 35 |                   |                      |                                             |                                 |
| 36 |                   |                      |                                             |                                 |
| 37 |                   |                      |                                             |                                 |
| 38 |                   |                      |                                             |                                 |
| 39 |                   |                      |                                             |                                 |
| 40 |                   |                      |                                             |                                 |
| 41 |                   |                      |                                             |                                 |
| 42 | Consent or assent | <a href="#">#26a</a> | Who will obtain informed consent or         | 10                              |
| 43 |                   |                      |                                             |                                 |
| 44 |                   |                      | assent from potential trial participants or |                                 |
| 45 |                   |                      | authorised surrogates, and how (see         |                                 |
| 46 |                   |                      | Item 32)                                    |                                 |
| 47 |                   |                      |                                             |                                 |
| 48 |                   |                      |                                             |                                 |
| 49 |                   |                      |                                             |                                 |
| 50 |                   |                      |                                             |                                 |
| 51 |                   |                      |                                             |                                 |
| 52 | Consent or        | <a href="#">#26b</a> | Additional consent provisions for           | n/a.                            |
| 53 |                   |                      |                                             |                                 |
| 54 | assent: ancillary |                      | collection and use of participant data      |                                 |
| 55 |                   |                      |                                             | This study will not collect     |
| 56 |                   |                      |                                             | biological specimens.           |
| 57 | studies           |                      |                                             |                                 |
| 58 |                   |                      |                                             |                                 |
| 59 |                   |                      |                                             |                                 |
| 60 |                   |                      |                                             |                                 |



|    |                       |                                                                 |                               |
|----|-----------------------|-----------------------------------------------------------------|-------------------------------|
| 1  |                       | and biological specimens in ancillary                           |                               |
| 2  |                       | studies, if applicable                                          |                               |
| 3  |                       |                                                                 |                               |
| 4  |                       |                                                                 |                               |
| 5  |                       |                                                                 |                               |
| 6  | Confidentiality       | <a href="#">#27</a> How personal information about              | 3                             |
| 7  |                       | potential and enrolled participants will                        |                               |
| 8  |                       | be collected, shared, and maintained in                         |                               |
| 9  |                       | order to protect confidentiality before,                        |                               |
| 10 |                       | during, and after the trial                                     |                               |
| 11 |                       |                                                                 |                               |
| 12 |                       |                                                                 |                               |
| 13 |                       |                                                                 |                               |
| 14 |                       |                                                                 |                               |
| 15 |                       |                                                                 |                               |
| 16 |                       |                                                                 |                               |
| 17 |                       |                                                                 |                               |
| 18 | Declaration of        | <a href="#">#28</a> Financial and other competing interests     | 26                            |
| 19 | interests             | for principal investigators for the overall                     |                               |
| 20 |                       | trial and each study site                                       |                               |
| 21 |                       |                                                                 |                               |
| 22 |                       |                                                                 |                               |
| 23 |                       |                                                                 |                               |
| 24 |                       |                                                                 |                               |
| 25 |                       |                                                                 |                               |
| 26 | Data access           | <a href="#">#29</a> Statement of who will have access to        | 3                             |
| 27 |                       | the final trial dataset, and disclosure of                      |                               |
| 28 |                       | contractual agreements that limit such                          |                               |
| 29 |                       | access for investigators                                        |                               |
| 30 |                       |                                                                 |                               |
| 31 |                       |                                                                 |                               |
| 32 |                       |                                                                 |                               |
| 33 |                       |                                                                 |                               |
| 34 |                       |                                                                 |                               |
| 35 |                       |                                                                 |                               |
| 36 | Ancillary and post    | <a href="#">#30</a> Provisions, if any, for ancillary and post- | n/a.                          |
| 37 | trial care            | trial care, and for compensation to those                       |                               |
| 38 |                       | who suffer harm from trial participation                        | This is a childhood obesity   |
| 39 |                       |                                                                 | prevention intervention.      |
| 40 |                       |                                                                 | Based on our experiences, it  |
| 41 |                       |                                                                 | is less likely that ancillary |
| 42 |                       |                                                                 | and post-trial care will take |
| 43 |                       |                                                                 | place.                        |
| 44 |                       |                                                                 |                               |
| 45 |                       |                                                                 |                               |
| 46 |                       |                                                                 |                               |
| 47 |                       |                                                                 |                               |
| 48 |                       |                                                                 |                               |
| 49 |                       |                                                                 |                               |
| 50 |                       |                                                                 |                               |
| 51 |                       |                                                                 |                               |
| 52 |                       |                                                                 |                               |
| 53 | Dissemination         | <a href="#">#31a</a> Plans for investigators and sponsor to     | 3                             |
| 54 | policy: trial results | communicate trial results to participants,                      |                               |
| 55 |                       | healthcare professionals, the public,                           |                               |
| 56 |                       |                                                                 |                               |
| 57 |                       |                                                                 |                               |
| 58 |                       |                                                                 |                               |
| 59 |                       |                                                                 |                               |
| 60 |                       |                                                                 |                               |

and other relevant groups (eg, via  
 publication, reporting in results  
 databases, or other data sharing  
 arrangements), including any  
 publication restrictions

Dissemination [#31b](#) Authorship eligibility guidelines and any n/a  
 policy: authorship intended use of professional writers

Dissemination [#31c](#) Plans, if any, for granting public access n/a  
 policy: to the full protocol, participant-level  
 reproducible dataset, and statistical code  
 research

Informed consent [#32](#) Model consent form and other related 10  
 materials documentation given to participants and  
 authorised surrogates

Biological [#33](#) Plans for collection, laboratory n/a  
 specimens evaluation, and storage of biological  
 specimens for genetic or molecular This study will not collect  
 analysis in the current trial and for future biological specimens.  
 use in ancillary studies, if applicable

The SPIRIT checklist is distributed under the terms of the Creative Commons Attribution License CC-  
 BY-ND 3.0. This checklist can be completed online using <https://www.goodreports.org/>, a tool made  
 by the [EQUATOR Network](#) in collaboration with [Penelope.ai](#)

# BMJ Open

## A school-based, multi-faceted health promotion programme to prevent obesity among children: protocol of a cluster-randomized controlled trial (the DECIDE-Children study)

|                                 |                                                                                                                                                                                                                                                                                                                                                                                                                                                                                                                                                                                                                                                                                                                                                                                                                                                                                                                                                                                                                                                                                                                                                                                                                                         |
|---------------------------------|-----------------------------------------------------------------------------------------------------------------------------------------------------------------------------------------------------------------------------------------------------------------------------------------------------------------------------------------------------------------------------------------------------------------------------------------------------------------------------------------------------------------------------------------------------------------------------------------------------------------------------------------------------------------------------------------------------------------------------------------------------------------------------------------------------------------------------------------------------------------------------------------------------------------------------------------------------------------------------------------------------------------------------------------------------------------------------------------------------------------------------------------------------------------------------------------------------------------------------------------|
| Journal:                        | <i>BMJ Open</i>                                                                                                                                                                                                                                                                                                                                                                                                                                                                                                                                                                                                                                                                                                                                                                                                                                                                                                                                                                                                                                                                                                                                                                                                                         |
| Manuscript ID                   | bmjopen-2018-027902.R3                                                                                                                                                                                                                                                                                                                                                                                                                                                                                                                                                                                                                                                                                                                                                                                                                                                                                                                                                                                                                                                                                                                                                                                                                  |
| Article Type:                   | Protocol                                                                                                                                                                                                                                                                                                                                                                                                                                                                                                                                                                                                                                                                                                                                                                                                                                                                                                                                                                                                                                                                                                                                                                                                                                |
| Date Submitted by the Author:   | 23-Sep-2019                                                                                                                                                                                                                                                                                                                                                                                                                                                                                                                                                                                                                                                                                                                                                                                                                                                                                                                                                                                                                                                                                                                                                                                                                             |
| Complete List of Authors:       | <p>Liu, Zheng; Peking University, Department of Maternal and Child Health, School of Public Health<br/> Wu, Yangfeng; Peking University Clinical Research Institute, Peking University Clinical Research Institute<br/> Niu, Wen-Yi; Peking University, Department of Social Medicine and Health Education, School of Public Health<br/> Feng, Xiangxian; Changzhi Medical College, Changzhi Medical College<br/> Lin, Yi; Urumqi Primary and Secondary School Health Care Center, Urumqi Primary and Secondary School Health Care Center<br/> Gao, Aiyu; Dongcheng Primary and Secondary School Health Care Center, Dongcheng Primary and Secondary School Health Care Center<br/> Zhang, Fang; Mentougou Primary and Secondary School Health Care Center, Mentougou Primary and Secondary School Health Care Center<br/> Fang, Hai; Peking University, China Center for Health Development Studies<br/> GAO, Pei; Peking University, Department of Epidemiology and Biostatistics, School of Public Health<br/> Li, Hui-Juan; Peking University Clinical Research Institute, Peking University Clinical Research Institute<br/> Wang, Haijun; School of Public Health, Peking University, Department of Maternal and Child Health</p> |
| <b>Primary Subject Heading</b>: | Epidemiology                                                                                                                                                                                                                                                                                                                                                                                                                                                                                                                                                                                                                                                                                                                                                                                                                                                                                                                                                                                                                                                                                                                                                                                                                            |
| Secondary Subject Heading:      | Paediatrics, Public health                                                                                                                                                                                                                                                                                                                                                                                                                                                                                                                                                                                                                                                                                                                                                                                                                                                                                                                                                                                                                                                                                                                                                                                                              |
| Keywords:                       | pediatric obesity, cluster, prevention, randomized controlled trial                                                                                                                                                                                                                                                                                                                                                                                                                                                                                                                                                                                                                                                                                                                                                                                                                                                                                                                                                                                                                                                                                                                                                                     |
|                                 |                                                                                                                                                                                                                                                                                                                                                                                                                                                                                                                                                                                                                                                                                                                                                                                                                                                                                                                                                                                                                                                                                                                                                                                                                                         |

SCHOLARONE™  
Manuscripts

1  
2  
3  
4 1 **A school-based, multi-faceted health promotion programme to**  
5  
6 2 **prevent obesity among children: protocol of a cluster-randomized**  
7  
8 3 **controlled trial (the DECIDE-Children study)**  
9  
10  
11  
12 4

13  
14 5 Zheng Liu<sup>1</sup>, Yang-Feng Wu<sup>2</sup>, Wen-Yi Niu<sup>3</sup>, Xiang-Xian Feng<sup>4</sup>, Yi Lin<sup>5</sup>, Ai-Yu Gao<sup>6</sup>,  
15  
16 6 Fang Zhang<sup>7</sup>, Hai Fang<sup>8</sup>, Pei Gao<sup>9</sup>, Hui-Juan Li<sup>2</sup>, Hai-Jun Wang<sup>1</sup>, the study team for  
17  
18 7 the DECIDE-children study  
19  
20  
21

22 8 1 Department of Maternal and Child Health, School of Public Health, Peking University,  
23  
24 9 Beijing, China; 2 Peking University Clinical Research Institute, Beijing, China; 3  
25  
26 10 Department of Social Medicine and Health Education, School of Public Health, Peking  
27  
28 11 University, Beijing, China; 4 Changzhi Medical College, Shanxi, China; 5 Urumqi  
29  
30 12 Primary and Secondary School Health Care Center, Xinjiang, China; 6 Dongcheng  
31  
32 13 Primary and Secondary School Health Care Center, Beijing, China; 7 Mentougou  
33  
34 14 Primary and Secondary School Health Care Center, Beijing, China; 8 China Center for  
35  
36 15 Health Development Studies, Peking University, Beijing, China; 9 Department of  
37  
38 16 Epidemiology and Biostatistics, School of Public Health, Peking University, Beijing,  
39  
40 17 China  
41  
42  
43  
44  
45  
46  
47  
48  
49  
50

51 19 Corresponding author:

52  
53 20 Professor Hai-Jun Wang, Department of Maternal and Child Health, School of Public  
54  
55 21 Health, Peking University. No. 38 Xueyuan Road, Haidian District, 100191 Beijing,  
56  
57 22 China. Email: whjun@pku.edu.cn  
58  
59  
60

1  
2  
3  
4 23**Abstract**

5  
6 24 **Introduction** Obesity is a public health concern that is becoming increasingly more  
7  
8  
9 25 serious worldwide. Effective and sustainable childhood obesity prevention strategies  
10  
11 26 may help to reduce the prevalence of obesity and may have an impact on lifelong health.  
12  
13  
14 27 However, few such strategies have been rigorously evaluated for Chinese children in  
15  
16  
17 28 different regions of China.

18  
19 29 **Methods and analysis** DECIDE-Children is a cluster-randomized controlled trial that  
20  
21  
22 30 aims to assess the effectiveness and sustainability of a school-based, multi-faceted  
23  
24  
25 31 intervention to prevent obesity among Grade 4 primary school students (8 to 10 years  
26  
27  
28 32 old) in China. Twenty-four schools (approximately 1200 students) from above average,  
29  
30  
31 33 average and below average developed regions in China will be randomized to an  
32  
33  
34 34 intervention (12 schools) or usual practice (12 schools) group. The intervention will last  
35  
36  
37 35 for one school year (9 months) and consist of activities towards students, parents and  
38  
39  
40 36 school environment. A smartphone application will be used to assist in providing  
41  
42  
43 37 information on, monitoring and providing feedback on the behaviours and body weight  
44  
45  
46 38 of the students. Data will be collected at baseline, 4 months, 9 months and 21 months.  
47  
48  
49 39 The primary outcome will be the difference between groups in the change in students'  
50  
51  
52 40 body mass index (BMI) at 9 months after the baseline investigation. The secondary  
53  
54  
55 41 outcomes will include the differences between groups in the changes in anthropometric  
56  
57  
58 42 measures, diet, physical activity levels and other measures at the follow-up visits. A  
59  
60 43 variety of process evaluation methods will be used to evaluate the implementation  
44 process of the complex intervention.

1  
2  
3  
4 45 **Ethics and dissemination** This study was approved by the Peking University  
5  
6 46 Institution Review Board (IRB00001052-18021). The results will be disseminated  
7  
8  
9 47 through publication in peer-reviewed journals, presentations at conferences and in lay  
10  
11  
12 48 summaries provided to school staff and participants.  
13  
14 49 **Trial registration** ClinicalTrials.gov: NCT03665857.  
15  
16  
17  
18  
19  
20  
21  
22  
23  
24  
25  
26  
27  
28  
29  
30  
31  
32  
33  
34  
35  
36  
37  
38  
39  
40  
41  
42  
43  
44  
45  
46  
47  
48  
49  
50  
51  
52  
53  
54  
55  
56  
57  
58  
59  
60

For peer review only

1  
2  
3  
4 **50 Strengths and limitations of this study**

- 5  
6  
7 51 1. This study will rigorously evaluate the effectiveness of a childhood obesity  
8  
9 52 prevention programme in eastern, central and western regions with different levels of  
10  
11 53 economic development in China.  
12  
13  
14 54 2. We will employ a smartphone application to assist in providing information on,  
15  
16 55 monitoring and providing feedback on the behaviours and body weight of the students.  
17  
18  
19 56 3. We will include an explicit process evaluation plan for both the intervention and the  
20  
21 57 control groups, which will evaluate the implementation process of the complex  
22  
23 58 intervention.  
24  
25  
26  
27 59 4. A follow-up investigation will be conducted to evaluate the sustainability of the  
28  
29 60 intervention.  
30  
31  
32 61 5. This intervention is limited by a relatively short duration, but additional funding will  
33  
34  
35 62 be sought for the implementation of a long-term intervention in the future.  
36  
37  
38  
39  
40  
41  
42  
43  
44  
45  
46  
47  
48  
49  
50  
51  
52  
53  
54  
55  
56  
57  
58  
59  
60

## 63 **Introduction**

64 Childhood obesity is a significant public health concern worldwide [1, 2]. In China,  
65 childhood obesity has dramatically increased as the economy has grown quickly over  
66 the past decades. The prevalence of obesity among 7- to 18-year-old Chinese children  
67 increased from 0.1% in 1985 to 7.3% in 2014 [2]. Childhood obesity is associated with  
68 not only adverse consequences on the physical and mental health of children in the short  
69 term [3, 4], but also increases the risk of developing cardiovascular diseases in the long  
70 term [5, 6]. Accordingly, effective strategies to curb and reduce childhood obesity  
71 prevalence may help to prevent cardiovascular diseases in the whole population in the  
72 long term.

73 The development of childhood obesity is complex and may involve multi-factorial  
74 mechanisms, but in most cases, it essentially results from an imbalance between energy  
75 intake and energy expenditure. Children spend half of their waking hours at school and  
76 consume at least one-third of their daily calories at school; thus, school-based  
77 interventions are promising in preventing childhood obesity [7]. In particular, multi-  
78 faceted interventions combining diet, physical activity and a family component have  
79 shown the highest effectiveness [7, 8]. However, there is a paucity of rigorously  
80 developed and evaluated prevention interventions for Chinese children [8, 9]. Moreover,  
81 not all school-based interventions have been effective in preventing excessive weight  
82 gain in children [10, 11]. One potential interpretation of this finding is that adherence  
83 to the intervention components was not guaranteed [11]. It is thus crucial to increase  
84 our understanding of how and why these interventions work or do not work [12]. To



1  
2  
3  
4 85 achieve this, a thorough process evaluation of the intervention implementation is  
5  
6 86 necessary. Furthermore, socioeconomic development is associated with patterns of  
7  
8  
9 87 childhood obesity [13] and may also affect the effectiveness of a childhood obesity  
10  
11  
12 88 intervention. Social disparities in the patterns of obesity differ between China and  
13  
14 89 Western countries. In China, socioeconomic development has been positively  
15  
16  
17 90 associated with overweight and obesity prevalence in children [13]. However, previous  
18  
19  
20 91 studies have been largely conducted in a single region, which limits the generalizability  
21  
22  
23 92 of study findings to other populations. Another weakness is that most studies examined  
24  
25  
26 93 outcomes only at the end of the intervention. Thus, it remains unclear whether healthy  
27  
28  
29 94 behaviours and a healthy weight are maintained beyond the period of the intervention.

### 30 95 *School system in China*

31  
32  
33 96 In primary schools in China, there are six grades in total, and the age of the students  
34  
35  
36 97 ranges from 6 to 11 years. The typical size of a Chinese class is fewer than 45 students,  
37  
38  
39 98 but varies in different schools, ranging from 30 to 60 students. There are two school  
40  
41  
42 99 policies that have been issued by the Chinese government that are particularly relevant  
43  
44  
45 100 to the prevention and management of childhood obesity. First, schools should have  
46  
47  
48 101 school doctors or health care teachers who provide in-house school health care. The  
49  
50  
51 102 routine practices include student health surveillance, health education for students, and  
52  
53  
54 103 the prevention and control of common diseases in students. Second, schools should  
55  
56  
57 104 implement 'One-Hour Physical Activity On Campus Every School Day'. That is, the  
58  
59  
60 105 total duration of physical activity (i.e., physical education classes, exercises during  
106 breaks from class and extracurricular activities) per school day should be no less than

1  
2  
3  
4 107 one hour. However, the implementation of these policies in the school systems in China  
5  
6 108 varies by region [14].  
7  
8

9 109 ***Development of a childhood obesity intervention***

10  
11 110 To fill in research gaps, in accordance with the school systems in China, we underwent  
12  
13  
14 111 four stages to develop the intervention: (1) we systematically reviewed previous  
15  
16  
17 112 literature to identify intervention elements related to intervention effectiveness; (2) we  
18  
19  
20 113 conducted focus group discussions and interviews with key informants (children,  
21  
22 114 parents, teachers, school principals, local health and education officials) to further  
23  
24  
25 115 revise and refine the intervention approaches; (3) we conducted a three-month, before-  
26  
27 116 after, pilot study at two primary schools in Beijing (one in an urban area and the other  
28  
29  
30 117 in a rural area) involving 58 Grade 4 students (mean age: 9.38±0.49 years) to test the  
31  
32  
33 118 feasibility of the proposed intervention [15]; and (4) we further discussed the proposed  
34  
35  
36 119 intervention with multiple experts. Based on all the work mentioned, we finally  
37  
38 120 developed the intervention elements used for this study.  
39

40 121 ***Aim and objectives***

41  
42  
43 122 To develop effective lifestyle interventions for the prevention and control of  
44  
45 123 cardiovascular disease in China, the Diet, ExerCIse and CarDiovascular hEalth  
46  
47  
48 124 (DECIDE) project was initiated in 2016. As one of five independent DECIDE studies,  
49  
50  
51 125 the DECIDE-Children study aims to develop a school-based, multi-faceted childhood  
52  
53 126 obesity prevention programme targeting school children aged 8-10 years in three  
54  
55  
56 127 different regions of China and rigorously test its effectiveness in preventing excessive  
57  
58 128 weight gain in Chinese primary school settings. The research objectives of the  
59  
60

1  
2  
3  
4 129 DECIDE-Children study were (1) to assess the effectiveness of the intervention  
5  
6 130 compared with the usual practice in preventing childhood overweight and obesity; (2)  
7  
8  
9 131 to determine the sustainability of the intervention in preventing overweight and obesity;  
10  
11  
12 132 and (3) to evaluate the process and health economics of the intervention.  
13

### 14 133 **Methods and analysis**

15  
16  
17 134 This protocol has been prepared in accordance with the Standard Protocol Items:  
18  
19 135 Recommendations for Interventional Trials (SPIRIT) statement [16, 17].  
20  
21

#### 22 136 *Study design*

23  
24 137 DECIDE-Children is a cluster-randomized, parallel-group controlled trial. To  
25  
26  
27 138 accommodate the social and economic variations within the country, we will  
28  
29  
30 139 intentionally select schools from three different regions of China: the above average  
31  
32  
33 140 developed area in the east (Beijing), the average developed area in central China  
34  
35 141 (Shanxi) and the below average developed area in the west (Xinjiang). A total of 24  
36  
37  
38 142 primary schools (clusters) equally distributed among three regions will be selected. In  
39  
40 143 Beijing, 4 schools will be selected from the Dongcheng district (located in the centre of  
41  
42  
43 144 the city), and 4 will be selected from the Mentougou district (located in a rural suburban  
44  
45  
46 145 area). In Xinjiang, all 8 schools will be selected from Urumchi, the capital city of the  
47  
48 146 autonomous region; four of the schools will be selected from the Shayiba district (an  
49  
50  
51 147 urban district), and the other four schools will be selected from the Shuimogou district  
52  
53  
54 148 (a rural district). In Shanxi, all 8 schools will be selected from only one urban district,  
55  
56 149 Changzhi, a small- to medium-sized city in the province. The reason for excluding rural  
57  
58  
59 150 schools in Changzhi is that most of the rural schools are boarding schools, and parents  
60

1  
2  
3  
4 151 are difficult to reach in boarding schools. Thus, a total of 24 primary schools from five  
5  
6 152 sites in three regions will be selected and randomized into two groups, the obesity  
7  
8  
9 153 prevention intervention group and the usual practice group. The intervention will be  
10  
11 154 implemented for one school year from late September 2018 to June 2019, and the study  
12  
13  
14 155 will continue with a one-year follow-up investigation in June 2020. Figure 1 shows the  
15  
16  
17 156 flow of the study.

## 19 157 ***Recruitment***

### 22 158 **Recruitment of the schools**

24 159 The present study will be carried out in Grade 4 students (8 to 10 years old), as they are  
25  
26  
27 160 sufficiently mature to understand health education information and are able to remain  
28  
29  
30 161 in the same school to complete the two-year study before they graduate. For a school  
31  
32 162 to be eligible, the school principal must agree with the randomization procedure and  
33  
34  
35 163 comply with the study protocol. The total number of Grade 4 students must be greater  
36  
37 164 than 50 in the school, and schools that have implemented or are planning to implement  
38  
39  
40 165 an obesity prevention intervention or similar intervention programme will not be  
41  
42 166 eligible. Boarding schools and specialty schools for children with talents or minority  
43  
44  
45 167 ethnic groups will be excluded. Schools will also not be included if they have a definite  
46  
47  
48 168 plan for relocation or cancellation in the next two years. For the schools participating  
49  
50  
51 169 in the programme, the size of a class will vary between fewer than 30 children and  
52  
53 170 approximately 60 children per class. If the number of students in each class is less than  
54  
55  
56 171 50, we will recruit two classes from the school, and if the number of students is greater  
57  
58  
59 172 than 50, we will recruit one class to meet the sample size requirement. If there are more  
60

1  
2  
3  
4 173 classes in one school than needed for the study, the school principal will recommend  
5  
6 174 which classes we should select.

7  
8  
9 175 Three steps will be followed for the recruitment of the schools. First, project staff will  
10  
11 176 contact the local education authorities to gain their opinion, support, and approval of  
12  
13 177 the study and basic information of the schools (type of schools and the number of  
14  
15 178 students and teachers). Second, project staff will contact the schools by phone or visit  
16  
17 179 the schools to determine the eligibility of the selected schools for the study. Third, the  
18  
19 180 final list of eligible schools and classes will be made by the principal investigator and  
20  
21 181 schools will be invited to participate in the study by local research partners.

## 22 182 **Recruitment of the students**

23  
24  
25 183 After recruiting the schools and before conducting the baseline measurements, written  
26  
27 184 informed consent will be provided by all students and their primary caregivers (parents  
28  
29 185 in most cases) in the selected classes. Then, the parents who provide informed consent  
30  
31 186 will be required to complete a questionnaire about the health status of their children.  
32  
33 187 The project staff will collect the questionnaires and if a parent reports one of the  
34  
35 188 following conditions, his or her children will be excluded: 1) medical history of heart  
36  
37 189 disease, hypertension, diabetes, tuberculosis, asthma, hepatitis or nephritis; 2) obesity  
38  
39 190 caused by endocrine diseases or side effects of drugs; 3) abnormal physical  
40  
41 191 development like dwarfism or gigantism; 4) physical deformity such as severe scoliosis,  
42  
43 192 pectus carinatum, limp, obvious O-leg or X-leg; 5) inability to participate in school  
44  
45 193 sport activities; 6) a loss in weight by vomiting or taking drugs during the past three  
46  
47 194 months.

1  
2  
3  
4 195 ***Randomization procedures***

5  
6 196 The random sequence of allocation of the schools (clusters) to the intervention or  
7  
8  
9 197 control group will be stratified by the study sites. Schools in the same study site will be  
10  
11  
12 198 randomly allocated in a 1:1 ratio to either the intervention or control group using a  
13  
14 199 computer-generated random number system (the simple random sampling method).  
15  
16  
17 200 Randomization will be performed by an independent person at the central coordinating  
18  
19 201 centre at Peking University Clinical Research Institute. The randomization will take  
20  
21  
22 202 place only after the baseline measurements are completed to ensure allocation  
23  
24  
25 203 concealment.

26  
27 204 ***Intervention***

28  
29  
30 205 We used the Social Ecological Model to identify intervention elements in this multi-  
31  
32 206 faceted health promotion programme [18]. As shown in Figure 2, the programme will  
33  
34  
35 207 target the influencing factors of childhood obesity at both individual (student-focused  
36  
37 208 activities) and environmental levels (a supportive family and school environment), with  
38  
39  
40 209 the intent to influence the knowledge, attitude and behaviours of school children.

41  
42  
43 210 **Description of the intervention components**

44  
45 211 The intervention components are described in Tables 1 and 2.

46  
47  
48 212 ***Student-focused activities:*** These activities will include health education activities for  
49  
50 213 students, the reinforcement of students' physical activity at school and the regular  
51  
52 214 monitoring of students' weight and height.

53  
54  
55 215 ***Activities towards parents:*** These activities will include health education activities for  
56  
57  
58 216 parents and the supervision and encouragement of children to increase their physical  
59  
60

1  
2  
3  
4 217 activity level outside of school.  
5

6 218 **Activities towards schools:** These activities will include school policies related to  
7  
8  
9 219 obesity prevention and health education activities for teachers.  
10

11 220 **The smartphone app:** Project staff, school teachers and parents will be suggested to  
12  
13  
14 221 install the app titled “Eat Wisely, Move Happily”. The app, which was developed based  
15  
16  
17 222 on behaviour change techniques [19], will aid in information diffusion, behaviour  
18  
19 223 monitoring, weight management, assessment and feedback.  
20

#### 21 22 224 **Quality control of the intervention**

23  
24 225 Two manuals (“An Operation Manual for Project Staff Involved in the Multi-  
25  
26  
27 226 component Obesity Intervention among Primary School Students” and “An Operation  
28  
29  
30 227 Manual for School Team Members Involved in the Multi-component Obesity  
31  
32 228 Intervention among Primary School Students”) have been developed for implementing  
33  
34  
35 229 and managing this complex intervention. The manuals describe in detail the duties of  
36  
37  
38 230 project staff and school team members (school principals, class teachers, physical  
39  
40 231 education teachers, school doctors/health care teachers) in delivering the intervention.  
41  
42  
43 232 The manuals also describe the detailed workflow of the implementation of each  
44  
45  
46 233 intervention component, i.e., by whom, when, how and to what extent the specific  
47  
48  
49 234 intervention element should be delivered. All of the project staff and school team  
50  
51 235 members will be required to conduct the intervention in accordance with the operation  
52  
53 236 manuals.  
54

55  
56 237 During implementation of the intervention, regular field observations will be made and  
57  
58 238 the smartphone app records will be checked. If it is found that schools are not complying  
59  
60

1  
2  
3  
4 239 with the study protocol, project staff will communicate with school team members in a  
5  
6 240 timely manner and conduct follow-ups to improve the fidelity of the study results.  
7  
8

9 241 ***Control group***

10  
11 242 The twelve schools in the control group will not carry out any of the DECIDE-Children  
12  
13 243 intervention components and will continue their usual practice according to their own  
14  
15 244 teaching curriculum during the study period (from September 2018 to June 2020).  
16  
17 245 Participants in the control group will receive the same health education materials that  
18  
19 246 will have been delivered to those in the intervention group immediately after the 21-  
20  
21 247 month follow-up investigation is completed in June 2020.  
22  
23  
24  
25

26  
27 248 ***Outcome evaluation***

28  
29 249 Table 3 describes the study outcomes, including when and how the study outcomes will  
30  
31 250 be evaluated. Baseline measurements will be conducted in September 2018 for both the  
32  
33 251 intervention and the control groups. Follow-up measurements will be conducted 4  
34  
35 252 months after the baseline measurements are conducted in January (after one school  
36  
37 253 semester and half way through the intervention), 9 months after the baseline  
38  
39 254 measurements are conducted in June 2019 (after one school year and immediately after  
40  
41 255 the whole intervention programme is completed) and 21 months after the baseline  
42  
43 256 measurements are conducted in June 2020 (after two school years and 12 months after  
44  
45 257 the intervention is completed).  
46  
47  
48  
49  
50  
51

52  
53 258 At the baseline and all follow-up visits, anthropometric measures (height, weight, waist  
54  
55 259 and hip circumference, systolic and diastolic blood pressures, body fat percentage) and  
56  
57 260 physical fitness measures (one-minute rope jumping, one-minute sit-up, long standing  
58  
59  
60



1  
2  
3  
4 261 jump, shuttle run (50 m×8)) will be collected by the trained outcome assessors using  
5  
6 262 the same device and/or forms according to the standard methods and procedures. The  
7  
8  
9 263 assessors measuring students' height and weight will be blinded to the group allocation  
10  
11 264 of the schools. We will use questionnaires to measure students' behaviours (duration of  
12  
13 265 moderate-to-vigorous physical activity, eating behaviour, sedentary behaviour), school  
14  
15 266 policies for prevention and management of childhood obesity, and other potential  
16  
17 267 moderators/mediators of the intervention (e.g., stage of readiness for behaviour change  
18  
19 268 related to weight reduction). The questionnaires were developed based on previous  
20  
21 269 studies and the pilot study. The questionnaires were found to be feasible for this study  
22  
23 270 and acceptable to students and their parents [20-22].  
24  
25  
26  
27  
28  
29

### 30 **Outcomes**

31  
32 272 The primary outcome is the difference between groups in the change in students' body  
33  
34 273 mass index ( $BMI = \text{weight (kg)} / (\text{height (m)})^2$ ) immediately after the intervention  
35  
36 274 completion (9 months after the baseline measurements are conducted). The secondary  
37  
38 275 outcomes include the change in BMI one year after the intervention is completed (21  
39  
40 276 months after the baseline measurements are conducted). In addition, we will compare  
41  
42 277 the following indices between groups at the follow-up visits: 1) change in students'  
43  
44 278 BMI z-score (standard deviation score will be calculated based on the World Health  
45  
46 279 Organization criteria [23]); 2) change in prevalence and incidence of childhood  
47  
48 280 overweight/obesity defined according to the criteria for Chinese children and  
49  
50 281 adolescents [24]; 3) change in students' waist circumference, waist-to-hip  
51  
52 282 circumference ratio and systolic and diastolic blood pressures; and 4) change in students'  
53  
54  
55  
56  
57  
58  
59  
60

1  
2  
3  
4 283 body fat percentage, physical fitness measures, behavioural outcomes (including  
5  
6 284 students' duration of moderate-to-vigorous physical activity, students' eating behaviour  
7  
8  
9 285 and students' sedentary behaviour) and other outcomes (including students' knowledge  
10  
11 286 related to energy balance, school policies for the prevention and management of  
12  
13  
14 287 childhood obesity and stage of readiness for behaviour change related to weight  
15  
16  
17 288 reduction).

### 18 19 289 ***Sample size estimation***

20  
21  
22 290 We assumed that the difference between the two groups in the change in BMI (effect  
23  
24 291 size) would be 0.50 kg/m<sup>2</sup>, the standard deviation (SD) of the BMI would be 1.40 kg/m<sup>2</sup>,  
25  
26  
27 292 the intra-cluster correlation coefficient would be 0.05 and the rate of attrition would be  
28  
29  
30 293 10% for the sample size calculation in our study. We aimed to recruit a total of 1,200  
31  
32 294 students from 24 schools with an average cluster size of 50 students per school. This  
33  
34  
35 295 sample size will provide 88% power with  $\alpha=0.05$  to detect a mean difference of 0.50  
36  
37 296 kg/m<sup>2</sup> in the change in BMI between groups after the intervention lasting one school  
38  
39  
40 297 year.

### 41 42 43 298 ***Statistical analyses***

44  
45 299 Statistical analyses will be performed using SAS version 9.4 (SAS Institute Inc., Cary,  
46  
47  
48 300 NC, USA). All statistical tests will be two-sided at the 5% level of significance.  
49  
50  
51 301 Baseline characteristics at both the school and individual levels will be reported by  
52  
53 302 using descriptive statistics.  
54  
55  
56 303 The primary analysis will be based on the intention-to-treat principle and include all  
57  
58 304 students recruited with the baseline BMIs measured. Generalized linear mixed models

1  
2  
3  
4 305 will be used to compare the primary and secondary outcomes at 4, 9, and 21 months  
5  
6 306 after the baseline measurements are conducted, and the models will adjust for the  
7  
8  
9 307 clustering effect and baseline outcome values. The missing data will be treated in the  
10  
11 308 maximum likelihood estimates assuming they are missing at random. The intra-cluster  
12  
13  
14 309 correlation coefficient will also be estimated. Sensitivity analysis will be performed on  
15  
16  
17 310 the primary outcome using the last-value-carry-forward imputation if the percentage of  
18  
19 311 missing data exceeds 5%. For continuous outcomes, we will report pre-, and post-  
20  
21  
22 312 intervention means for the intervention and control groups and model-adjusted mean  
23  
24 313 differences between groups. For binary outcomes, we will report pre- and post-  
25  
26  
27 314 intervention percentages for the intervention and control groups and adjusted odds  
28  
29  
30 315 ratios (ORs) between groups. The 95% confidence intervals (CIs) and associated *P*-  
31  
32 316 values will be calculated. We will also examine whether the differences in the outcomes  
33  
34  
35 317 between the control and intervention groups vary by the three regions (Beijing, Shanxi,  
36  
37 318 Xinjiang), the sex of children, socioeconomic status (mother's education), BMI status  
38  
39  
40 319 at baseline and primary caregivers of the children (parents compared with non-parents).

#### 41 42 43 320 ***Process evaluation***

44  
45 321 Based on the steps and principles described in the conceptual framework by Saunders  
46  
47  
48 322 et al.[25], we will identify the process evaluation elements including fidelity (the extent  
49  
50  
51 323 to which the intervention will be implemented as initially planned), dose delivered (the  
52  
53 324 frequency and intensity of the actual implementation of the programme), dose received  
54  
55  
56 325 (the extent to which students/primary caregivers (parents in most cases)/teachers will  
57  
58  
59 326 be exposed to the intervention, as well as the degree of their satisfaction with the

1  
2  
3  
4 327 intervention and materials), reach (the proportions and the characteristics of  
5  
6 328 students/primary caregivers/teachers completing or dropping out of the intervention)  
7  
8  
9 329 and context (family environment and school policies related to obesity prevention and  
10  
11 330 management).

12  
13  
14 331 The implementation process data collection procedure will include (1) direct regular  
15  
16 332 field observation and records which will be collected for the quality control of the  
17  
18 333 intervention (e.g., quality and quantity of the intervention sessions and number of  
19  
20 334 students attending the lectures) and will be recorded by the trained project staff; (2) the  
21  
22 335 user logs (e.g., frequency and duration) which will be collected by the smartphone app;  
23  
24 336 (3) school policies related to obesity prevention and management, which will be  
25  
26 337 collected by the questionnaires (Table 3) in both the intervention and the control groups;  
27  
28 338 and (4) interviews with participants (6~8 students per school) which will be conducted  
29  
30 339 in both the intervention and the control groups.

#### 340 ***Health economics evaluation***

341 A cost-effectiveness analysis will be employed in the health economics evaluation, and  
342 a societal perspective will be used to examine whether the intervention is economically  
343 feasible. Intervention costs will include hours spent by project staff, school staff, and  
344 students' primary caregivers (parents in most cases) for all the intervention activities  
345 and material expenses. Only the time spent by the project staff in implementing the  
346 intervention will be included. Time costs will be based on personal employment  
347 compensations if available or average compensations in the local areas for similar types  
348 of employees. Material expenses will be based on the actual purchasing prices. An

1  
2  
3  
4 349 incremental cost-effectiveness ratio will be calculated and a sensitivity analysis will be  
5  
6 350 used to vary key parameters to examine the robustness of the health economics results.  
7  
8

### 9 351 **Patient and Public involvement**

10  
11 352 We will conduct focus group discussions and interviews with key stakeholders  
12  
13  
14 353 (children, parents, teachers, school principals, local health, and education officials) by  
15  
16  
17 354 refining the intervention approach. We will not involve any of the stakeholders in other  
18  
19  
20 355 aspects of the research study, including idea development, design of the study,  
21  
22 356 implementation of the protocol, data collection, and analysis and interpretation of the  
23  
24  
25 357 results. The results of the study will be disseminated through publication in peer-  
26  
27  
28 358 reviewed journals, presentations at conferences and in lay summaries provided to  
29  
30  
31 359 school staff, students and parents. The benefits and burden of the intervention will be  
32  
33 360 assessed by children and their primary caregivers through self-reported questionnaires  
34  
35 361 at the end of the intervention.  
36

### 37 362 **Trial status**

38  
39  
40 363 The trial started and the recruitment of schools and children was completed in  
41  
42  
43 364 September 2018. Baseline measurements were conducted in the last few weeks in  
44  
45  
46 365 September 2018. The intervention lasting one school year started at the end of  
47  
48  
49 366 September 2018 and was completed in June 2019. The 4-month follow-up  
50  
51 367 measurements started and were completed in January 2019. The 9-month follow-up  
52  
53 368 measurements started and were completed in June 2019. The 21-month follow-up  
54  
55  
56 369 measurements will be completed in June 2020.

### 57 58 370 **Ethics and dissemination**

1  
2  
3  
4 371 This study was reviewed and approved by the Peking University Institution Review  
5  
6 372 Board (IRB00001052-18021). Any amendments to the study protocol will be submitted  
7  
8  
9 373 for IRB approval prior to implementation. Written informed consent will be obtained  
10  
11 374 from all students and their parents. All data collected will be entered into an electronic  
12  
13  
14 375 database with de-identified information. The database will be accessed only by  
15  
16  
17 376 designated staff with a password. The results will be disseminated through publication  
18  
19 377 in peer-reviewed journals, presentation at conferences and in lay summaries provided  
20  
21  
22 378 to school staff and participants. Upon completion of the trial and after the publication  
23  
24  
25 379 of these results, the data will be made available upon request by contacting the  
26  
27 380 corresponding author of this protocol.

## 30 381 **Discussion**

32 382 Non-communicable diseases, especially cardiovascular diseases, have contributed to  
33  
34  
35 383 the public health burden worldwide. Preventing childhood obesity in early life may  
36  
37  
38 384 have the greatest long-term effects in curbing this widespread burden. Although several  
39  
40  
41 385 childhood obesity intervention studies have been conducted in China, research gaps  
42  
43 386 exist in terms of methodological flaws, process measures, and sustainability of the  
44  
45  
46 387 intervention. The DECIDE-Children study is based on theory-driven and systematic  
47  
48 388 developments (e.g., systematic review [8], qualitative interviews, panel discussions and  
49  
50  
51 389 a pilot study [15]) and serves as one of the first examples of a rigorously developed and  
52  
53  
54 390 evaluated childhood obesity prevention programme that will be implemented in eastern,  
55  
56 391 central and western regions of China.

58 392 Our DECIDE-Children study can overcome poor adherence to the intervention

1  
2  
3  
4 393 components, which is a weakness of most previous studies, due to our favourable  
5  
6 394 collaborations with local education authorities as well as the rigorous quality control of  
7  
8  
9 395 implementing the intervention. This study also has several other distinguishing features:  
10  
11 396 1) randomization by an independent person not involved in the study, blinding of key  
12  
13  
14 397 outcome measures, and a detailed process evaluation plan will help to provide study  
15  
16  
17 398 results of high quality; 2) a follow-up investigation will be conducted one year after the  
18  
19  
20 399 intervention is completed to determine the sustainability of the effects of the  
21  
22 400 intervention; 3) a smartphone app will be employed to assist in providing information  
23  
24  
25 401 on, monitoring and providing feedback on the behaviours and body weight of the  
26  
27  
28 402 children; 4) three centres located in eastern, central and western regions of China will  
29  
30  
31 403 be involved in the study to reflect the different levels of economic development in  
32  
33 404 China; and 5) most of the intervention components (school polices, regular monitoring  
34  
35 405 of students' weight and height, reinforcement of students' physical activity at school,  
36  
37  
38 406 health education activities for students) will be integrated into the regular academic  
39  
40 407 schedule of each intervention school.  
41  
42  
43  
44  
45  
46  
47  
48  
49  
50  
51  
52  
53  
54  
55  
56  
57  
58  
59  
60

## References

1. Ng M, Fleming T, Robinson M, et al. Global, regional, and national prevalence of overweight and obesity in children and adults during 1980-2013: a systematic analysis for the Global Burden of Disease Study 2013. *Lancet*, 2014, 384: 766-781.
2. Wang S, Dong YH, Wang ZH, et al. Trends in overweight and obesity among Chinese children of 7-18 years old during 1985-2014. *Zhonghua Yu Fang Yi Xue Za Zhi*, 2017, 51: 300-305.
3. Booth JN, Tomporowski PD, Boyle JM, et al. Obesity impairs academic attainment in adolescence: findings from ALSPAC, a UK cohort. *Int J Obes (Lond)*, 2014, 38: 1335-1342.
4. Pulgaron ER. Childhood obesity: a review of increased risk for physical and psychological comorbidities. *Clin Ther*, 2013, 35: A18-32.
5. Twig G, Yaniv G, Levine H, et al. Body-mass index in 2.3 million adolescents and cardiovascular death in adulthood. *N Engl J Med*, 2016, 374: 2430-2440.
6. Gunnell DJ, Frankel SJ, Nanchahal K, et al. Childhood obesity and adult cardiovascular mortality: a 57-year follow-up study based on the Boyd Orr cohort. *Am J Clin Nutr*, 1998, 136: 664-672.
7. Bleich SN, Vercammen KA, Zatz LY, et al. Interventions to prevent global childhood overweight and obesity: a systematic review. *Lancet Diabetes Endocrinol*, 2018, 6: 332-346.
8. Feng L, Wei D-M, Lin S-T, et al. Systematic review and meta-analysis of



- 1  
2  
3  
4 school-based obesity interventions in mainland China. PLoS One, 2017, 12:  
5  
6 e0184704-e0184704.  
7  
8  
9 9. Li B, Liu WJ, Adab P, et al. Cluster-randomised controlled trial to assess the  
10  
11 effectiveness and cost-effectiveness of an obesity prevention programme for  
12  
13 Chinese primary school-aged children: the CHIRPY DRAGON study protocol.  
14  
15 BMJ Open, 2017, 7: e018415.  
16  
17  
18  
19 10. Wang Z, Xu F, Ye Q, et al. Childhood obesity prevention through a community-  
20  
21 based cluster randomized controlled physical activity intervention among  
22  
23 schools in china: the health legacy project of the 2nd world summer youth  
24  
25 olympic Games (YOG-Obesity study). Int J Obes (Lond), 2018, 42: 625-633.  
26  
27  
28  
29 11. Liu Z, Li Q, Maddison R, et al. A School-Based Comprehensive Intervention for  
30  
31 Childhood Obesity in China: A Cluster Randomized Controlled Trial. Child  
32  
33 Obes, 2019, 15(2): 105-15.  
34  
35  
36  
37 12. JaKa MM, Haapala JL, Trapl ES, et al. Reporting of treatment fidelity in  
38  
39 behavioural paediatric obesity intervention trials: a systematic review. Obes  
40  
41 Rev, 2016, 17(12): 1287-300.  
42  
43  
44  
45 13. Dong Y, Jan C, Ma Y, et al. Economic development and the nutritional status of  
46  
47 Chinese school-aged children and adolescents from 1995 to 2014: an analysis  
48  
49 of five successive national surveys. Lancet Diabetes Endocrinol, 2019, 7: 288-  
50  
51 299.  
52  
53  
54  
55 14. Yao H, Zhu G, Zhang X, et al. Current situation and analysis of school  
56  
57 physicians in primary and secondary schools in 16 provinces in China. Chin J  
58  
59  
60

- Sch Health, 2018, 39(10): 1455-8.
15. Lin L, Li C, Gao A, et al. Effect of a comprehensive school-based intervention on childhood obesity. *Chin J Sch Health*, 2018, 39: 1505-1508.
16. Chan AW, Tetzlaff JM, Altman DG, et al. SPIRIT 2013 statement: defining standard protocol items for clinical trials. *Ann Intern Med*, 2013, 158: 200-207.
17. Chan AW, Tetzlaff JM, Gotzsche PC, et al. SPIRIT 2013 explanation and elaboration: guidance for protocols of clinical trials. *BMJ*, 2013, 346: e7586.
18. Sallis J, Owen N, Fisher E. *Ecological models of health behavior*, in *Health behavior and Health Education*, Glanz K, Rimer B, and Viswanath K, Editors. 2008, Jossey-Bass, A Wiley Imprint: San Francisco, CA. p. 465-485.
19. Martin J, Chater A, Lorencatto F. Effective behavior change techniques in the prevention and management of childhood obesity. *Int J Obes*, 2013, 37:1287-94.
20. Hunsberger M, O'Malley J, Block T, et al. Relative validation of Block Kids Food Screener for dietary assessment in children and adolescents. *Matern Child Nutr*, 2015, 11: 260-270.
21. Liu AL, Ma GS, Zhang Q, et al. Reliability and validity of a 7-day physical activity questionnaire for elementary students. [Article in Chinese]. *Zhonghua Liu Xing Bing Xue Za Zhi*, 2003, 24: 901-904.
22. Wardle J, Guthrie CA, Sanderson S, et al. Development of the Children's Eating Behaviour Questionnaire. *J Child Psychol Psychiatry*, 2001, 42: 963-970.
23. de Onis M, Onyango A, Borghi E, Siyam A, Nishida C, Siekmann J.

1  
2  
3  
4 Development of a WHO growth reference for school-aged children and  
5 adolescents. Bull World Health Organ, 2007, 85: 660-667.  
6  
7

- 8  
9 24. National Health Commission of the People's Republic of China. Screening for  
10 overweight and obesity among school-age children and adolescents (WS/T 586-  
11 2018). Beijing, China; 2018.  
12  
13  
14  
15  
16  
17 25. Saunders RP, Evans MH, and Joshi P. Developing a process-evaluation plan for  
18 assessing health promotion program implementation: a how-to guide. Health  
19 promotion practice, 2005, 6: 134-147.  
20  
21  
22  
23  
24  
25  
26  
27  
28  
29  
30  
31  
32  
33  
34  
35  
36  
37  
38  
39  
40  
41  
42  
43  
44  
45  
46  
47  
48  
49  
50  
51  
52  
53  
54  
55  
56  
57  
58  
59  
60

**Authors' contributions**

HJW and YFW conceived the project. HJW, ZL, YFW, WYN and HJL were involved in design of the study and development of intervention materials. ZL wrote the first draft of the manuscript. XXF, YL, AYG and FZ contributed to implementation of the program. HF contributed to economic evaluation. PG contributed to statistical analysis plan. All authors approved the final manuscript.

For peer review only

## Acknowledgements

We thank Jun-Shi Chen, Li-Ming Wen, Jun Ma, Guan-Sheng Ma, Ke-Ji Li, Yan-Fang Wang, Zheng-Zhen Wang, Hong-Juan Li, Qian Zhang and Yao Zhao for their support and advice in the study design and intervention development. We also thank the children and their parents, school principals and teachers for their participation in the research. We thank China Mobile Research Institute for their help in development of the smartphone application.

### Study team of the DECIDE-Children study:

**Beijing:** Department of Maternal and Child Health, School of Public Health, Peking University (Hai-Jun Wang, Zheng Liu, Li-Zi Lin, Qiang Feng, Chen-Xiong Li, Shuang Zhou, Wen-Hao Li, Chu-Yao Jin, Qin Li, Yu Cheng, Di Wang, Lan Cheng, Yi Song, Hong Zhou, Xiang-Rong Xu, Jie-Yun Song); Dongcheng Primary and Secondary School Health Care Center, Beijing (Ai-Yu Gao, Hai-Hua Chen, Li-Jia Shang), Mentougou Primary and Secondary School Health Care Center, Beijing (Fang Zhang, Run-Ze Chen).

**Changzhi:** Changzhi Medical College (Xiang-Xian Feng, Jian-hui Yuan, Li-fen Duan).

**Urumqi:** Urumqi Primary and Secondary School Health Care Center, Xinjiang (Yi Lin, Chun-Xia Xu, Guo-Qin Yang, Zheng Zhang).

### Funding statement

This work was supported by National Key R&D Program of China (2016YFC1300200-4), the China Postdoctoral Science Foundation (2019M650391) and the National

1  
2  
3  
4 Natural Science Foundation of China (81903343).  
5

6 **Competing interests statement**  
7

8  
9 None.  
10  
11  
12  
13  
14  
15  
16  
17  
18  
19  
20  
21  
22  
23  
24  
25  
26  
27  
28  
29  
30  
31  
32  
33  
34  
35  
36  
37  
38  
39  
40  
41  
42  
43  
44  
45  
46  
47  
48  
49  
50  
51  
52  
53  
54  
55  
56  
57  
58  
59  
60

For peer review only

**Table 1 Description of the intervention components implemented in the DECIDE-Children study**

| Intervention components                         | Descriptions of the content, frequency, and duration                                                                                                                                                                                                                                                                                                                                                                                                                                                                                                                                                                                                                                                                                                                                                                                                                                                                                                                                                                                                                                                                                                                                                                                                                                                    | Person responsible         |
|-------------------------------------------------|---------------------------------------------------------------------------------------------------------------------------------------------------------------------------------------------------------------------------------------------------------------------------------------------------------------------------------------------------------------------------------------------------------------------------------------------------------------------------------------------------------------------------------------------------------------------------------------------------------------------------------------------------------------------------------------------------------------------------------------------------------------------------------------------------------------------------------------------------------------------------------------------------------------------------------------------------------------------------------------------------------------------------------------------------------------------------------------------------------------------------------------------------------------------------------------------------------------------------------------------------------------------------------------------------------|----------------------------|
| <b>1. Student-focused activities</b>            |                                                                                                                                                                                                                                                                                                                                                                                                                                                                                                                                                                                                                                                                                                                                                                                                                                                                                                                                                                                                                                                                                                                                                                                                                                                                                                         |                            |
| <b>Health education activities for students</b> | <p><u>(1) Frequency and duration</u><br/>A total of ten activities (each lasting 40 minutes) will be provided once every two to three weeks (six activities will be arranged in the first semester, and four will be arranged in the second semester).</p> <p><u>(2) Different kinds of activities</u><br/>The ten activities will include seven health education lectures and three theme class meetings. The focus of the health education lectures will be on information diffusion, while the focus of theme class meetings will be on consolidation of the key messages learned in health education lectures through interactive and interesting group work (e.g., “Let me guess”).</p> <p><u>(3) Content</u><br/>1) Information diffusion<br/>Key messages will include the benefits of healthy weight, measurements and assessments of weight, and methods of achieving a healthy weight (not eating excessively; not drinking sugar-sweetened beverage; eating less high-energy food; less sedentary behaviours; performing more physical activity). Health education books and “nutrition evaluation turnplate for Chinese primary and middle school students” will be delivered to students. Health education messages will also be spread through posters on campus or in the classroom.</p> | The trained class teachers |

1  
2  
3  
4  
5  
6  
7  
8  
9  
10  
11  
12  
13  
14  
15  
16  
17  
18  
19  
20  
21  
22  
23  
24  
25  
26  
27  
28  
29  
30  
31  
32  
33  
34  
35  
36  
37  
38  
39  
40  
41  
42  
43  
44  
45  
46

|                                                                          |                                                                                                                                                                                                                                                                                                                                                                                                                                                                                                                                                                                                                                                                                                                                                                                                                                                                                                                                                                                                                        |                                                                                                                                                                                  |
|--------------------------------------------------------------------------|------------------------------------------------------------------------------------------------------------------------------------------------------------------------------------------------------------------------------------------------------------------------------------------------------------------------------------------------------------------------------------------------------------------------------------------------------------------------------------------------------------------------------------------------------------------------------------------------------------------------------------------------------------------------------------------------------------------------------------------------------------------------------------------------------------------------------------------------------------------------------------------------------------------------------------------------------------------------------------------------------------------------|----------------------------------------------------------------------------------------------------------------------------------------------------------------------------------|
|                                                                          | <p>2) Promotion for translating knowledge into action<br/> “Small hand in big hand” homework (e.g., “challenge of three days away from screen”) will be arranged at the end of each health education activity.</p> <p>3) Feedback and encouragement for BMI and behaviour change<br/> Feedback of regular monitoring results of students’ BMIs and behaviours will be provided in each health education activity. The students with good performance will be encouraged.</p>                                                                                                                                                                                                                                                                                                                                                                                                                                                                                                                                           |                                                                                                                                                                                  |
| <p><b>Reinforcement of students’ physical activity within school</b></p> | <p>1) Students will be instructed by physical education teachers to perform physical activities with moderate-to-vigorous intensity at school for at least one hour per school day (including physical education classes, class-break exercise, extracurricular activities). The aim of this component will be to improve the adherence to the Chinese national requirement for ‘One-Hour Physical Activity On Campus Every School Day’. If a school has met this requirement, no extra physical activities will be added at the school; otherwise, extra physical activities (i.e. physical education classes, exercises during breaks in class or extracurricular activities) will be added to the school schedule. The monitoring of the implementation of these extra physical activities will be continuous within the intervention period for the intervention group;</p> <p>2) Physical education teachers will be advised to teach students at least one sports game during each extracurricular activity.</p> | <p>The trained physical education teachers</p>                                                                                                                                   |
| <p><b>Regular monitoring of students’ weight and height</b></p>          | <p><u>1) Monthly monitoring</u><br/> Students’ weight and height will be monitored monthly, and the data will then be input into the computer management system in a timely manner and shown in the smartphone app (described below);</p> <p><u>2) Weekly monitoring</u></p>                                                                                                                                                                                                                                                                                                                                                                                                                                                                                                                                                                                                                                                                                                                                           | <p>The trained school doctors/health care teachers with the assistance of the trained project staff (for monthly monitoring);<br/> The trained project staff (for data input</p> |



|                                                                                  |                                                                                                                                                                                                                                                                                                                                                                                                                                                                                                                                                                                                                                                                                                                                                                                                                                                                                         |                                                            |
|----------------------------------------------------------------------------------|-----------------------------------------------------------------------------------------------------------------------------------------------------------------------------------------------------------------------------------------------------------------------------------------------------------------------------------------------------------------------------------------------------------------------------------------------------------------------------------------------------------------------------------------------------------------------------------------------------------------------------------------------------------------------------------------------------------------------------------------------------------------------------------------------------------------------------------------------------------------------------------------|------------------------------------------------------------|
|                                                                                  | Students' weight will be monitored weekly by the students themselves in the classroom.                                                                                                                                                                                                                                                                                                                                                                                                                                                                                                                                                                                                                                                                                                                                                                                                  | of monthly monitoring)<br>Students (for weekly monitoring) |
| <b>2. Activities towards parents (providing a supportive family environment)</b> |                                                                                                                                                                                                                                                                                                                                                                                                                                                                                                                                                                                                                                                                                                                                                                                                                                                                                         |                                                            |
| <b>Health education activities for parents</b>                                   | <p><u>1) Frequency and duration</u><br/>At least one activity (lasting for approximately 40-60 minutes) will be held at the beginning of each semester. One more activity will be held in the middle of the first semester. Another activity will also be held in the middle of the second semester if necessary (for example, if the fidelity of the data is unsatisfactory).</p> <p><u>2) Contents</u></p> <ul style="list-style-type: none"> <li>➤ For the first activity<br/>Key messages will be similar to those for the health education activities for students (described above). Parents will also be taught to use the smartphone app.</li> <li>➤ For other activities<br/>Project staff will provide feedback about students' weight status and behaviours to parents. Face-to-face group discussions will be established between the project staff and parents.</li> </ul> | The trained project staff                                  |
| <b>Reinforcement of students' physical activity outside school</b>               | <ol style="list-style-type: none"> <li>1) Parents will be instructed to supervise and encourage students to perform physical activities outside of school for 30 minutes per weekday and 1 hour per weekend day;</li> <li>2) Recommendations for physical activity outside of school will be provided through the smartphone app once every two months;</li> <li>3) Students will be encouraged to participate in sports games outside of school that will be taught by their physical education teachers during extracurricular activities.</li> </ol>                                                                                                                                                                                                                                                                                                                                 | Students' parents                                          |
| <b>3. Activities towards schools (providing a supportive school environment)</b> |                                                                                                                                                                                                                                                                                                                                                                                                                                                                                                                                                                                                                                                                                                                                                                                                                                                                                         |                                                            |

1  
2  
3  
4  
5  
6  
7  
8  
9  
10  
11  
12  
13  
14  
15  
16  
17  
18  
19  
20  
21  
22  
23  
24  
25  
26  
27  
28  
29  
30  
31  
32  
33  
34  
35  
36  
37  
38  
39  
40  
41  
42  
43  
44  
45  
46

|                                                                           |                                                                                                                                                                                                                                                                                                                                                                                                                                                                                                                                                                                 |                                                                              |
|---------------------------------------------------------------------------|---------------------------------------------------------------------------------------------------------------------------------------------------------------------------------------------------------------------------------------------------------------------------------------------------------------------------------------------------------------------------------------------------------------------------------------------------------------------------------------------------------------------------------------------------------------------------------|------------------------------------------------------------------------------|
| <b>School policies related to obesity prevention</b>                      | <p>The following school policies will be suggested:</p> <p>1) “Not selling”:<br/>Not selling unhealthy snacks<sup>1</sup> or sugar-sweetened beverages within school;</p> <p>2) “Not eating”:<br/>Telling students not to eat unhealthy snacks or drink sugar-sweetened beverages at school;</p> <p>3) “Not buying”:<br/>Students being educated by class teachers not to buy unhealthy snacks or sugar-sweetened beverages around school.</p>                                                                                                                                  | <p>The trained school principal;<br/>The trained class teachers</p>          |
| <b>Health education activities for school teachers</b>                    | <p><u>1) Frequency and duration</u><br/>The activity will be held once (lasting for approximately 40 minutes) in the first month of the intervention. School teachers participating in this programme at each school (school principal, class teachers, school doctors/health care teachers and physical education teachers) will be required to attend the activity.</p> <p><u>2) Content</u><br/>Key messages will be similar to those for the health education activities for students (described above). School teachers will also be taught to use the smartphone app.</p> | <p>The trained project staff</p>                                             |
| <b>4. A smartphone app assisted in implementation of the intervention</b> |                                                                                                                                                                                                                                                                                                                                                                                                                                                                                                                                                                                 |                                                                              |
| <p>The smartphone app (“Eat Wisely, Move</p>                              | <p><u>1) Information diffusion (the behaviour change technique (BCT) used: providing information on consequences of behaviours)</u></p>                                                                                                                                                                                                                                                                                                                                                                                                                                         | <p>The smartphone app (installed by parents, school teachers and project</p> |

<sup>1</sup> “Healthy snacks” refer to dairy products, fresh vegetables or fruits and natural unprocessed nuts which are eaten at times other than at main meals. “Unhealthy snacks” refer to snacks other than the three kinds of healthy snacks.

|                  |                                                                                                                                                                                                                                                                                                                                                                                                                                                                                                                                                                                                                                                                                                                                                                                                                                                                                                                                                                                                                                                                                                                                                                                                                                                                                             |                                                                              |
|------------------|---------------------------------------------------------------------------------------------------------------------------------------------------------------------------------------------------------------------------------------------------------------------------------------------------------------------------------------------------------------------------------------------------------------------------------------------------------------------------------------------------------------------------------------------------------------------------------------------------------------------------------------------------------------------------------------------------------------------------------------------------------------------------------------------------------------------------------------------------------------------------------------------------------------------------------------------------------------------------------------------------------------------------------------------------------------------------------------------------------------------------------------------------------------------------------------------------------------------------------------------------------------------------------------------|------------------------------------------------------------------------------|
| <p>Happily”)</p> | <p>The smartphone app will provide information to parents, class teachers and project staff in accordance with the health education activities.</p> <p><u>2) Behaviour monitoring (the BCT used: prompting the self-monitoring of behaviours)</u></p> <p>Parents together with their children will be asked to record the diet and physical activity behaviours of students in the app weekly, and then they will receive individualized feedback related to these behaviours (described in Table 2).</p> <p><u>3) Weight management (the BCT used: prompting self-monitoring)</u></p> <p>According to the monthly monitoring of students’ weight and height (described above), parents, school teachers and project staff will view the recent weight status (categorized according to the BMI percentile criteria [24]), changes compared with previous records of the students and the individualized feedback related to weight management (described in Table 2).</p> <p><u>4) Assessment and feedback (the BCT used: providing feedback on performance)</u></p> <p>The smartphone app will also provide a synthetic and individualized assessment that will combine changes in the behaviours and weight status of the students. The four kinds of feedback are shown in Table 2.</p> | <p>staff) and the computer management system (utilized by project staff)</p> |
|------------------|---------------------------------------------------------------------------------------------------------------------------------------------------------------------------------------------------------------------------------------------------------------------------------------------------------------------------------------------------------------------------------------------------------------------------------------------------------------------------------------------------------------------------------------------------------------------------------------------------------------------------------------------------------------------------------------------------------------------------------------------------------------------------------------------------------------------------------------------------------------------------------------------------------------------------------------------------------------------------------------------------------------------------------------------------------------------------------------------------------------------------------------------------------------------------------------------------------------------------------------------------------------------------------------------|------------------------------------------------------------------------------|

**Table 2 The four kinds of regular evaluation feedback messages provided to all stakeholders by the smartphone mobile app on the basis of data from the regular monitoring of children’s weight, height and behaviours**

|                                                                                                               |                               | Results automatically judged according to the heights and weights measured at the regular monitoring intervals                                                                        |                                                                                                                                                                                                                                                                                                                     |
|---------------------------------------------------------------------------------------------------------------|-------------------------------|---------------------------------------------------------------------------------------------------------------------------------------------------------------------------------------|---------------------------------------------------------------------------------------------------------------------------------------------------------------------------------------------------------------------------------------------------------------------------------------------------------------------|
|                                                                                                               |                               | Positive results<br>(BMI decreases in students who are overweight or obese, or BMI increases in students who are underweight)                                                         | Negative results<br>(BMI increases in students who are overweight or obese, or BMI decreases in students who are underweight)                                                                                                                                                                                       |
| <b>Results automatically judged according to the diet and physical activity behaviours recorded regularly</b> | Full marks/<br>getting better | <b>Feedback 1:</b> “Your child is doing a great job. The weight changes are consistent with the changes in the diet and physical activity behaviours. Keep it up!”                    | <b>Feedback 2:</b> “Your child’s weight has not improved, but the diet and physical activity behaviours are good. It might be that weight improvement requires long-term adherence to a reasonable diet and physical activity behaviour, or that the behaviour records are inaccurate. Please continue to improve!” |
|                                                                                                               | Unchanged/<br>getting worse   | <b>Feedback 3:</b> “Your child has improved or maintained a healthy body weight, but there is still room for improvement in the diet and physical activity behaviours. Keep working!” | <b>Feedback 4:</b> “Your child’s weight has not improved, and the diet and physical activity behaviours also need improvement. Please continue to work hard!”                                                                                                                                                       |

**Table 3 Outcome measurements for the DECIDE-Children study**

| Outcomes                                  | Time     |                            |                            |                             | Device (Manufacturer, model)                                                                                    | Method                                           |
|-------------------------------------------|----------|----------------------------|----------------------------|-----------------------------|-----------------------------------------------------------------------------------------------------------------|--------------------------------------------------|
|                                           | Baseline | 4 months<br>after baseline | 9 months<br>after baseline | 21 months<br>after baseline |                                                                                                                 |                                                  |
| <b>Anthropometric measures</b>            |          |                            |                            |                             |                                                                                                                 |                                                  |
| Height                                    | √        | √                          | √                          | √                           | Stadiometer<br>(Huateng GMCS-1)                                                                                 | Measured to the nearest 0.1 cm at least<br>twice |
| Weight                                    | √        | √                          | √                          | √                           | Lever scale<br>(Wujin RGT-140)                                                                                  | Measured to the nearest 0.1 kg at least<br>twice |
| Waist circumference                       | √        | √                          | √                          | √                           | Tape<br>(MyoTape)                                                                                               | Measured to the nearest 0.1 cm at least<br>twice |
| Hip circumference                         | √        | √                          | √                          | √                           | Tape<br>(MyoTape)                                                                                               | Measured to the nearest 0.1 cm at least<br>twice |
| Systolic and diastolic<br>blood pressures | √        | √                          | √                          | √                           | Electronic sphygmomanometer<br>(Omron HBP-1300)                                                                 | Measured to the nearest 1 mmHg at least<br>twice |
| Body fat percentage                       | √        |                            | √                          |                             | Body component instrument<br>(Tanita MC-780 MA)                                                                 | According to the standard procedure              |
| <b>Physical fitness measures</b>          |          |                            |                            |                             |                                                                                                                 |                                                  |
| One-minute rope<br>jumping                | √        |                            | √                          |                             | Physical fitness measures will be assessed by trained outcome assessors<br>according to the standard procedure. |                                                  |

1  
2  
3  
4  
5  
6  
7  
8  
9  
10  
11  
12  
13  
14  
15  
16  
17  
18  
19  
20  
21  
22  
23  
24  
25  
26  
27  
28  
29  
30  
31  
32  
33  
34  
35  
36  
37  
38  
39  
40  
41  
42  
43  
44  
45  
46

|                                                              |   |   |                                                                                                                                                                                                                                                                                                                                                                                                                                                                                                                                                                                                                                                                                                                                                                                                                                                                                                                                                                                                                            |
|--------------------------------------------------------------|---|---|----------------------------------------------------------------------------------------------------------------------------------------------------------------------------------------------------------------------------------------------------------------------------------------------------------------------------------------------------------------------------------------------------------------------------------------------------------------------------------------------------------------------------------------------------------------------------------------------------------------------------------------------------------------------------------------------------------------------------------------------------------------------------------------------------------------------------------------------------------------------------------------------------------------------------------------------------------------------------------------------------------------------------|
| One-minute sit-up                                            | √ | √ |                                                                                                                                                                                                                                                                                                                                                                                                                                                                                                                                                                                                                                                                                                                                                                                                                                                                                                                                                                                                                            |
| Long standing jump                                           | √ | √ |                                                                                                                                                                                                                                                                                                                                                                                                                                                                                                                                                                                                                                                                                                                                                                                                                                                                                                                                                                                                                            |
| Shuttle run (50 m×8)                                         | √ | √ |                                                                                                                                                                                                                                                                                                                                                                                                                                                                                                                                                                                                                                                                                                                                                                                                                                                                                                                                                                                                                            |
| <b>Behavioural measures and other measures</b>               |   |   |                                                                                                                                                                                                                                                                                                                                                                                                                                                                                                                                                                                                                                                                                                                                                                                                                                                                                                                                                                                                                            |
| Students' knowledge related to energy balance                | √ | √ | <p>We will use 8 items to assess the change in students' knowledge related to energy balance. For example, we will ask students, "Is it correct that drinking sugar-sweetened beverage cannot substitute drinking water ?" Three choices will be provided (right; wrong; not clear).</p> <p>Students should finish the questionnaires in the classroom in the presence of the trained outcome assessors, who can provide guidance and help.</p> <p>The questions were designed based on a validated 7-day physical activity questionnaire (PAQ; kappa values for test-retest results were 0.46~0.79 (different measures of activity), face validity and content validity were good based on experts' evaluations, and the correlations between the PAQ and Caltrac motion sensor data ranged from 0.38 to 0.46 (different measures of activity) for boys) [21].</p> <p>Students should finish the questionnaires in the classroom in the presence of the trained outcome assessors, who can provide guidance and help.</p> |
| Students' duration of moderate-to-vigorous physical activity | √ | √ | <p>We will use the "Children Eating Behaviour Questionnaire" (CEBQ) to assess students' eating behaviours, including their responsiveness to food and enjoyment of food. This 35-item instrument has been shown to have relatively</p>                                                                                                                                                                                                                                                                                                                                                                                                                                                                                                                                                                                                                                                                                                                                                                                     |

|    |                         |   |   |                                                                                 |
|----|-------------------------|---|---|---------------------------------------------------------------------------------|
| 1  |                         |   |   | good reliability [22].                                                          |
| 2  |                         |   |   | The questionnaires should be self-reported by parents or other primary          |
| 3  |                         |   |   | caregivers of the students.                                                     |
| 4  |                         |   |   | We will use a self-designed questionnaire to determine the average duration of  |
| 5  |                         |   |   | completing homework, watching television and playing electronic devices per     |
| 6  |                         |   |   | day during the last week.                                                       |
| 7  |                         |   |   | Students should finish the questionnaires in the classroom in the presence of   |
| 8  |                         |   |   | the trained outcome assessors, who can provide guidance and help.               |
| 9  |                         |   |   | The questionnaires should be filled by the trained investigators after face-to- |
| 10 |                         |   |   | face interviews with school principals, doctors/health care teachers and        |
| 11 | Students' sedentary     | √ | √ | physical education teachers.                                                    |
| 12 | behaviour               |   |   | We will use two items for the assessment. First, we will ask "Have you taken    |
| 13 |                         |   |   | action to reduce your weight during the last three months?" Yes/no choices      |
| 14 |                         |   |   | will be provided. In addition, we will ask "Do you currently intend to reduce   |
| 15 |                         |   |   | your weight?" Five choices ranging from "completely do not intend" to "intend   |
| 16 |                         |   |   | to very much" will be provided.                                                 |
| 17 | School policies for the |   |   | Students should finish the questionnaires in the classroom in the presence of   |
| 18 | prevention and          | √ | √ | the trained outcome assessors, who can provide guidance and help.               |
| 19 | management of           |   |   | The questionnaires should be filled by the trained investigators after face-to- |
| 20 | childhood obesity       |   |   | face interviews with school principals, doctors/health care teachers and        |
| 21 |                         |   |   | physical education teachers.                                                    |
| 22 |                         |   |   | We will use two items for the assessment. First, we will ask "Have you taken    |
| 23 |                         |   |   | action to reduce your weight during the last three months?" Yes/no choices      |
| 24 |                         |   |   | will be provided. In addition, we will ask "Do you currently intend to reduce   |
| 25 | Stage of readiness for  |   |   | your weight?" Five choices ranging from "completely do not intend" to "intend   |
| 26 | behaviour change        | √ | √ | to very much" will be provided.                                                 |
| 27 | related to weight       |   |   | Students should finish the questionnaires in the classroom in the presence of   |
| 28 | reduction               |   |   | the trained outcome assessors, who can provide guidance and help.               |
| 29 |                         |   |   |                                                                                 |
| 30 |                         |   |   |                                                                                 |
| 31 |                         |   |   |                                                                                 |
| 32 |                         |   |   |                                                                                 |
| 33 |                         |   |   |                                                                                 |
| 34 |                         |   |   |                                                                                 |
| 35 |                         |   |   |                                                                                 |
| 36 |                         |   |   |                                                                                 |
| 37 |                         |   |   |                                                                                 |
| 38 |                         |   |   |                                                                                 |
| 39 |                         |   |   |                                                                                 |
| 40 |                         |   |   |                                                                                 |
| 41 |                         |   |   |                                                                                 |
| 42 |                         |   |   |                                                                                 |
| 43 |                         |   |   |                                                                                 |
| 44 |                         |   |   |                                                                                 |
| 45 |                         |   |   |                                                                                 |
| 46 |                         |   |   |                                                                                 |

1  
2  
3  
4  
5  
6  
7  
8  
9  
10  
11  
12  
13  
14  
15  
16  
17  
18  
19  
20  
21  
22  
23  
24  
25  
26  
27  
28  
29  
30  
31  
32  
33  
34  
35  
36  
37  
38  
39  
40  
41  
42  
43  
44  
45  
46  
47  
48  
49  
50  
51  
52  
53  
54  
55  
56  
57  
58  
59  
60

Figure 1 Flow of the DECIDE-Children study

Figure 2 The Social Ecological Model as applied to the DECIDE-Children study

For peer review only





Figure 1 Flow of the DECIDE-Children study

1  
2  
3  
4  
5  
6  
7  
8  
9  
10  
11  
12  
13  
14  
15  
16  
17  
18  
19  
20  
21  
22  
23  
24  
25  
26  
27  
28  
29  
30  
31  
32  
33  
34  
35  
36  
37  
38  
39  
40  
41  
42  
43  
44  
45  
46



Figure 2 The Social Ecological Model as applied to the DECIDE-Children study

# Reporting checklist for protocol of a clinical trial.

Based on the SPIRIT guidelines.

## Instructions to authors

Complete this checklist by entering the page numbers from your manuscript where readers will find each of the items listed below.

Your article may not currently address all the items on the checklist. Please modify your text to include the missing information. If you are certain that an item does not apply, please write "n/a" and provide a short explanation.

Upload your completed checklist as an extra file when you submit to a journal.

In your methods section, say that you used the SPIRIT reporting guidelines, and cite them as:

Chan A-W, Tetzlaff JM, Altman DG, Laupacis A, Gøtzsche PC, Krleža-Jerić K, Hróbjartsson A, Mann H, Dickersin K, Berlin J, Doré C, Parulekar W, Summerskill W, Groves T, Schulz K, Sox H, Rockhold FW, Rennie D, Moher D. SPIRIT 2013 Statement: Defining standard protocol items for clinical trials. *Ann Intern Med.* 2013;158(3):200-207

|                    |                     | Reporting Item                                                                                               | Page Number |
|--------------------|---------------------|--------------------------------------------------------------------------------------------------------------|-------------|
| Title              | <a href="#">#1</a>  | Descriptive title identifying the study design, population, interventions, and, if applicable, trial acronym | 1           |
| Trial registration | <a href="#">#2a</a> | Trial identifier and registry name. If not yet registered, name of intended registry                         | 3           |

|    |                     |                     |                                            |                                |
|----|---------------------|---------------------|--------------------------------------------|--------------------------------|
| 1  | Trial registration: | <a href="#">#2b</a> | All items from the World Health            | This information is provided   |
| 2  |                     |                     |                                            |                                |
| 3  | data set            |                     | Organization Trial Registration Data Set   | in the trial registration      |
| 4  |                     |                     |                                            | website.                       |
| 5  |                     |                     |                                            |                                |
| 6  |                     |                     |                                            |                                |
| 7  |                     |                     |                                            |                                |
| 8  | Protocol version    | <a href="#">#3</a>  | Date and version identifier                | This information will be       |
| 9  |                     |                     |                                            | provided as soon as the        |
| 10 |                     |                     |                                            | manuscript revision is finally |
| 11 |                     |                     |                                            | completed.                     |
| 12 |                     |                     |                                            |                                |
| 13 |                     |                     |                                            |                                |
| 14 |                     |                     |                                            |                                |
| 15 |                     |                     |                                            |                                |
| 16 |                     |                     |                                            |                                |
| 17 |                     |                     |                                            |                                |
| 18 | Funding             | <a href="#">#4</a>  | Sources and types of financial, material,  | 25                             |
| 19 |                     |                     | and other support                          |                                |
| 20 |                     |                     |                                            |                                |
| 21 |                     |                     |                                            |                                |
| 22 |                     |                     |                                            |                                |
| 23 |                     |                     |                                            |                                |
| 24 | Roles and           | <a href="#">#5a</a> | Names, affiliations, and roles of protocol | 24-25                          |
| 25 | responsibilities:   |                     | contributors                               |                                |
| 26 |                     |                     |                                            |                                |
| 27 | contributorship     |                     |                                            |                                |
| 28 |                     |                     |                                            |                                |
| 29 |                     |                     |                                            |                                |
| 30 |                     |                     |                                            |                                |
| 31 | Roles and           | <a href="#">#5b</a> | Name and contact information for the       | n/a.                           |
| 32 | responsibilities:   |                     | trial sponsor                              |                                |
| 33 |                     |                     |                                            |                                |
| 34 | sponsor contact     |                     |                                            | This study was not             |
| 35 |                     |                     |                                            | sponsored by any individuals   |
| 36 |                     |                     |                                            | or companies. The funder       |
| 37 | information         |                     |                                            | name and number has been       |
| 38 |                     |                     |                                            | provided in Page 25.           |
| 39 |                     |                     |                                            |                                |
| 40 |                     |                     |                                            |                                |
| 41 |                     |                     |                                            |                                |
| 42 |                     |                     |                                            |                                |
| 43 |                     |                     |                                            |                                |
| 44 |                     |                     |                                            |                                |
| 45 |                     |                     |                                            |                                |
| 46 |                     |                     |                                            |                                |
| 47 | Roles and           | <a href="#">#5c</a> | Role of study sponsor and funders, if      | 26                             |
| 48 | responsibilities:   |                     | any, in study design; collection,          |                                |
| 49 |                     |                     | management, analysis, and                  |                                |
| 50 | sponsor and         |                     | interpretation of data; writing of the     |                                |
| 51 |                     |                     | report; and the decision to submit the     |                                |
| 52 | funder              |                     |                                            |                                |
| 53 |                     |                     |                                            |                                |
| 54 |                     |                     |                                            |                                |
| 55 |                     |                     |                                            |                                |
| 56 |                     |                     |                                            |                                |
| 57 |                     |                     |                                            |                                |
| 58 |                     |                     |                                            |                                |
| 59 |                     |                     |                                            |                                |
| 60 |                     |                     |                                            |                                |

report for publication, including whether they will have ultimate authority over any of these activities

|    |                   |                     |                                             |     |
|----|-------------------|---------------------|---------------------------------------------|-----|
| 1  |                   |                     |                                             |     |
| 2  |                   |                     |                                             |     |
| 3  |                   |                     |                                             |     |
| 4  |                   |                     |                                             |     |
| 5  |                   |                     |                                             |     |
| 6  |                   |                     |                                             |     |
| 7  |                   |                     |                                             |     |
| 8  | Roles and         | <a href="#">#5d</a> | Composition, roles, and responsibilities    | 25  |
| 9  |                   |                     |                                             |     |
| 10 | responsibilities: |                     | of the coordinating centre, steering        |     |
| 11 |                   |                     | committee, endpoint adjudication            |     |
| 12 | committees        |                     | committee, data management team,            |     |
| 13 |                   |                     | and other individuals or groups             |     |
| 14 |                   |                     | overseeing the trial, if applicable (see    |     |
| 15 |                   |                     | Item 21a for data monitoring committee)     |     |
| 16 |                   |                     |                                             |     |
| 17 |                   |                     |                                             |     |
| 18 |                   |                     |                                             |     |
| 19 |                   |                     |                                             |     |
| 20 |                   |                     |                                             |     |
| 21 |                   |                     |                                             |     |
| 22 |                   |                     |                                             |     |
| 23 |                   |                     |                                             |     |
| 24 | Background and    | <a href="#">#6a</a> | Description of research question and        | 5-7 |
| 25 |                   |                     | justification for undertaking the trial,    |     |
| 26 | rationale         |                     | including summary of relevant studies       |     |
| 27 |                   |                     | (published and unpublished) examining       |     |
| 28 |                   |                     | benefits and harms for each intervention    |     |
| 29 |                   |                     |                                             |     |
| 30 |                   |                     |                                             |     |
| 31 |                   |                     |                                             |     |
| 32 |                   |                     |                                             |     |
| 33 |                   |                     |                                             |     |
| 34 |                   |                     |                                             |     |
| 35 |                   |                     |                                             |     |
| 36 |                   |                     |                                             |     |
| 37 | Background and    | <a href="#">#6b</a> | Explanation for choice of comparators       | 6   |
| 38 |                   |                     |                                             |     |
| 39 | rationale: choice |                     |                                             |     |
| 40 |                   |                     |                                             |     |
| 41 | of comparators    |                     |                                             |     |
| 42 |                   |                     |                                             |     |
| 43 |                   |                     |                                             |     |
| 44 | Objectives        | <a href="#">#7</a>  | Specific objectives or hypotheses           | 7   |
| 45 |                   |                     |                                             |     |
| 46 |                   |                     |                                             |     |
| 47 | Trial design      | <a href="#">#8</a>  | Description of trial design including type  | 8   |
| 48 |                   |                     | of trial (eg, parallel group, crossover,    |     |
| 49 |                   |                     | factorial, single group), allocation ratio, |     |
| 50 |                   |                     | and framework (eg, superiority,             |     |
| 51 |                   |                     | equivalence, non-inferiority, exploratory)  |     |
| 52 |                   |                     |                                             |     |
| 53 |                   |                     |                                             |     |
| 54 |                   |                     |                                             |     |
| 55 |                   |                     |                                             |     |
| 56 |                   |                     |                                             |     |
| 57 |                   |                     |                                             |     |
| 58 |                   |                     |                                             |     |
| 59 |                   |                     |                                             |     |
| 60 |                   |                     |                                             |     |

|                                                                                                                                                          |                                 |                      |                                                                                                                                                                                                  |                                                                                                                                                                                                                              |
|----------------------------------------------------------------------------------------------------------------------------------------------------------|---------------------------------|----------------------|--------------------------------------------------------------------------------------------------------------------------------------------------------------------------------------------------|------------------------------------------------------------------------------------------------------------------------------------------------------------------------------------------------------------------------------|
| 1<br>2<br>3<br>4<br>5<br>6<br>7<br>8<br>9<br>10<br>11<br>12                                                                                              | Study setting                   | <a href="#">#9</a>   | Description of study settings (eg, community clinic, academic hospital) and list of countries where data will be collected. Reference to where list of study sites can be obtained               | 8                                                                                                                                                                                                                            |
| 13<br>14<br>15<br>16<br>17<br>18<br>19<br>20<br>21<br>22<br>23<br>24                                                                                     | Eligibility criteria            | <a href="#">#10</a>  | Inclusion and exclusion criteria for participants. If applicable, eligibility criteria for study centres and individuals who will perform the interventions (eg, surgeons, psychotherapists)     | 9-10                                                                                                                                                                                                                         |
| 25<br>26<br>27<br>28<br>29<br>30<br>31<br>32<br>33<br>34                                                                                                 | Interventions:<br>description   | <a href="#">#11a</a> | Interventions for each group with sufficient detail to allow replication, including how and when they will be administered                                                                       | 11, Table 1-2                                                                                                                                                                                                                |
| 35<br>36<br>37<br>38<br>39<br>40<br>41<br>42<br>43<br>44<br>45<br>46<br>47<br>48<br>49<br>50<br>51<br>52<br>53<br>54<br>55<br>56<br>57<br>58<br>59<br>60 | Interventions:<br>modifications | <a href="#">#11b</a> | Criteria for discontinuing or modifying allocated interventions for a given trial participant (eg, drug dose change in response to harms, participant request, or improving / worsening disease) | n/a.<br><br>This is a childhood obesity prevention intervention. Based on our previous experiences, it is less likely that discontinuing or modifying allocated interventions for a given trial participant will take place. |

|    |                  |                      |                                            |                                |
|----|------------------|----------------------|--------------------------------------------|--------------------------------|
| 1  | Interventions:   | <a href="#">#11c</a> | Strategies to improve adherence to         | 11-12                          |
| 2  |                  |                      |                                            |                                |
| 3  | adherence        |                      | intervention protocols, and any            |                                |
| 4  |                  |                      |                                            |                                |
| 5  |                  |                      | procedures for monitoring adherence        |                                |
| 6  |                  |                      |                                            |                                |
| 7  |                  |                      | (eg, drug tablet return; laboratory tests) |                                |
| 8  |                  |                      |                                            |                                |
| 9  |                  |                      |                                            |                                |
| 10 |                  |                      |                                            |                                |
| 11 | Interventions:   | <a href="#">#11d</a> | Relevant concomitant care and              | n/a.                           |
| 12 |                  |                      |                                            |                                |
| 13 | concomitant care |                      | interventions that are permitted or        | This is a childhood obesity    |
| 14 |                  |                      |                                            | prevention intervention.       |
| 15 |                  |                      | prohibited during the trial                | Based on our previous          |
| 16 |                  |                      |                                            | experiences, it is less likely |
| 17 |                  |                      |                                            | that concomitant care and      |
| 18 |                  |                      |                                            | interventions will take place. |
| 19 |                  |                      |                                            |                                |
| 20 |                  |                      |                                            |                                |
| 21 |                  |                      |                                            |                                |
| 22 |                  |                      |                                            |                                |
| 23 |                  |                      |                                            |                                |
| 24 |                  |                      |                                            |                                |
| 25 |                  |                      |                                            |                                |
| 26 |                  |                      |                                            |                                |
| 27 |                  |                      |                                            |                                |
| 28 | Outcomes         | <a href="#">#12</a>  | Primary, secondary, and other              | 13-14, Table 3                 |
| 29 |                  |                      |                                            |                                |
| 30 |                  |                      | outcomes, including the specific           |                                |
| 31 |                  |                      |                                            |                                |
| 32 |                  |                      | measurement variable (eg, systolic         |                                |
| 33 |                  |                      |                                            |                                |
| 34 |                  |                      | blood pressure), analysis metric (eg,      |                                |
| 35 |                  |                      |                                            |                                |
| 36 |                  |                      | change from baseline, final value, time    |                                |
| 37 |                  |                      |                                            |                                |
| 38 |                  |                      | to event), method of aggregation (eg,      |                                |
| 39 |                  |                      |                                            |                                |
| 40 |                  |                      | median, proportion), and time point for    |                                |
| 41 |                  |                      |                                            |                                |
| 42 |                  |                      | each outcome. Explanation of the           |                                |
| 43 |                  |                      |                                            |                                |
| 44 |                  |                      | clinical relevance of chosen efficacy and  |                                |
| 45 |                  |                      |                                            |                                |
| 46 |                  |                      | harm outcomes is strongly                  |                                |
| 47 |                  |                      |                                            |                                |
| 48 |                  |                      | recommended                                |                                |
| 49 |                  |                      |                                            |                                |
| 50 |                  |                      |                                            |                                |
| 51 |                  |                      |                                            |                                |
| 52 |                  |                      |                                            |                                |
| 53 |                  |                      |                                            |                                |
| 54 | Participant      | <a href="#">#13</a>  | Time schedule of enrolment,                | Figure 1                       |
| 55 |                  |                      |                                            |                                |
| 56 | timeline         |                      | interventions (including any run-ins and   |                                |
| 57 |                  |                      |                                            |                                |
| 58 |                  |                      |                                            |                                |
| 59 |                  |                      |                                            |                                |
| 60 |                  |                      |                                            |                                |

washouts), assessments, and visits for participants. A schematic diagram is highly recommended (see Figure)

|                                                                                                                                  |                                        |                      |                                                                                                                                                                                                                                                                                                                                                          |      |
|----------------------------------------------------------------------------------------------------------------------------------|----------------------------------------|----------------------|----------------------------------------------------------------------------------------------------------------------------------------------------------------------------------------------------------------------------------------------------------------------------------------------------------------------------------------------------------|------|
| 1<br>2<br>3<br>4<br>5<br>6<br>7                                                                                                  |                                        |                      |                                                                                                                                                                                                                                                                                                                                                          |      |
| 8<br>9<br>10<br>11<br>12<br>13<br>14<br>15<br>16<br>17<br>18<br>19                                                               | Sample size                            | <a href="#">#14</a>  | Estimated number of participants needed to achieve study objectives and how it was determined, including clinical and statistical assumptions supporting any sample size calculations                                                                                                                                                                    | 14   |
| 20<br>21<br>22<br>23<br>24<br>25<br>26<br>27                                                                                     | Recruitment                            | <a href="#">#15</a>  | Strategies for achieving adequate participant enrolment to reach target sample size                                                                                                                                                                                                                                                                      | 9-10 |
| 28<br>29<br>30<br>31<br>32<br>33<br>34<br>35<br>36<br>37<br>38<br>39<br>40<br>41<br>42<br>43<br>44<br>45<br>46<br>47<br>48<br>49 | Allocation:<br>sequence<br>generation  | <a href="#">#16a</a> | Method of generating the allocation sequence (eg, computer-generated random numbers), and list of any factors for stratification. To reduce predictability of a random sequence, details of any planned restriction (eg, blocking) should be provided in a separate document that is unavailable to those who enrol participants or assign interventions | 10   |
| 50<br>51<br>52<br>53<br>54<br>55<br>56<br>57<br>58<br>59<br>60                                                                   | Allocation<br>concealment<br>mechanism | <a href="#">#16b</a> | Mechanism of implementing the allocation sequence (eg, central telephone; sequentially numbered, opaque, sealed envelopes), describing                                                                                                                                                                                                                   | 10   |



|    |                    |                                                              |                                   |
|----|--------------------|--------------------------------------------------------------|-----------------------------------|
| 1  |                    | any steps to conceal the sequence until                      |                                   |
| 2  |                    |                                                              |                                   |
| 3  |                    | interventions are assigned                                   |                                   |
| 4  |                    |                                                              |                                   |
| 5  |                    |                                                              |                                   |
| 6  | Allocation:        | <a href="#">#16c</a> Who will generate the allocation        | 9-10                              |
| 7  |                    |                                                              |                                   |
| 8  | implementation     | sequence, who will enrol participants,                       |                                   |
| 9  |                    |                                                              |                                   |
| 10 |                    | and who will assign participants to                          |                                   |
| 11 |                    |                                                              |                                   |
| 12 |                    | interventions                                                |                                   |
| 13 |                    |                                                              |                                   |
| 14 |                    |                                                              |                                   |
| 15 |                    |                                                              |                                   |
| 16 | Blinding (masking) | <a href="#">#17a</a> Who will be blinded after assignment to | 13                                |
| 17 |                    |                                                              |                                   |
| 18 |                    | interventions (eg, trial participants, care                  |                                   |
| 19 |                    |                                                              |                                   |
| 20 |                    | providers, outcome assessors, data                           |                                   |
| 21 |                    |                                                              |                                   |
| 22 |                    | analysts), and how                                           |                                   |
| 23 |                    |                                                              |                                   |
| 24 |                    |                                                              |                                   |
| 25 |                    |                                                              |                                   |
| 26 | Blinding           | <a href="#">#17b</a> If blinded, circumstances under which   | n/a.                              |
| 27 |                    |                                                              |                                   |
| 28 | (masking):         | unblinding is permissible, and                               | The assessors measuring           |
| 29 |                    |                                                              | students' height and weight will  |
| 30 | emergency          | procedure for revealing a participant's                      | be blinded to group allocation of |
| 31 |                    |                                                              | the schools. We did not           |
| 32 | unblinding         | allocated intervention during the trial                      | anticipate any necessary          |
| 33 |                    |                                                              | circumstances when unblinding     |
| 34 |                    |                                                              | is permissible.                   |
| 35 |                    |                                                              |                                   |
| 36 |                    |                                                              |                                   |
| 37 |                    |                                                              |                                   |
| 38 |                    |                                                              |                                   |
| 39 |                    |                                                              |                                   |
| 40 | Data collection    | <a href="#">#18a</a> Plans for assessment and collection of  | 13                                |
| 41 |                    |                                                              |                                   |
| 42 | plan               | outcome, baseline, and other trial data,                     |                                   |
| 43 |                    |                                                              |                                   |
| 44 |                    | including any related processes to                           |                                   |
| 45 |                    |                                                              |                                   |
| 46 |                    | promote data quality (eg, duplicate                          |                                   |
| 47 |                    |                                                              |                                   |
| 48 |                    | measurements, training of assessors)                         |                                   |
| 49 |                    |                                                              |                                   |
| 50 |                    | and a description of study instruments                       |                                   |
| 51 |                    |                                                              |                                   |
| 52 |                    | (eg, questionnaires, laboratory tests)                       |                                   |
| 53 |                    |                                                              |                                   |
| 54 |                    | along with their reliability and validity, if                |                                   |
| 55 |                    |                                                              |                                   |
| 56 |                    | known. Reference to where data                               |                                   |
| 57 |                    |                                                              |                                   |
| 58 |                    |                                                              |                                   |
| 59 |                    |                                                              |                                   |
| 60 |                    |                                                              |                                   |

|    |                 |                                                             |    |
|----|-----------------|-------------------------------------------------------------|----|
| 1  |                 | collection forms can be found, if not in                    |    |
| 2  |                 |                                                             |    |
| 3  |                 | the protocol                                                |    |
| 4  |                 |                                                             |    |
| 5  |                 |                                                             |    |
| 6  | Data collection | <a href="#">#18b</a> Plans to promote participant retention | 15 |
| 7  |                 |                                                             |    |
| 8  | plan: retention | and complete follow-up, including list of                   |    |
| 9  |                 |                                                             |    |
| 10 |                 | any outcome data to be collected for                        |    |
| 11 |                 |                                                             |    |
| 12 |                 | participants who discontinue or deviate                     |    |
| 13 |                 |                                                             |    |
| 14 |                 | from intervention protocols                                 |    |
| 15 |                 |                                                             |    |
| 16 |                 |                                                             |    |
| 17 |                 |                                                             |    |
| 18 | Data management | <a href="#">#19</a> Plans for data entry, coding, security, | 3  |
| 19 |                 |                                                             |    |
| 20 |                 | and storage, including any related                          |    |
| 21 |                 |                                                             |    |
| 22 |                 | processes to promote data quality (eg,                      |    |
| 23 |                 |                                                             |    |
| 24 |                 | double data entry; range checks for                         |    |
| 25 |                 |                                                             |    |
| 26 |                 | data values). Reference to where                            |    |
| 27 |                 |                                                             |    |
| 28 |                 | details of data management procedures                       |    |
| 29 |                 |                                                             |    |
| 30 |                 | can be found, if not in the protocol                        |    |
| 31 |                 |                                                             |    |
| 32 |                 |                                                             |    |
| 33 |                 |                                                             |    |
| 34 | Statistics:     | <a href="#">#20a</a> Statistical methods for analysing      | 15 |
| 35 |                 |                                                             |    |
| 36 | outcomes        | primary and secondary outcomes.                             |    |
| 37 |                 |                                                             |    |
| 38 |                 | Reference to where other details of the                     |    |
| 39 |                 |                                                             |    |
| 40 |                 | statistical analysis plan can be found, if                  |    |
| 41 |                 |                                                             |    |
| 42 |                 | not in the protocol                                         |    |
| 43 |                 |                                                             |    |
| 44 |                 |                                                             |    |
| 45 |                 |                                                             |    |
| 46 | Statistics:     | <a href="#">#20b</a> Methods for any additional analyses    | 15 |
| 47 |                 |                                                             |    |
| 48 | additional      | (eg, subgroup and adjusted analyses)                        |    |
| 49 |                 |                                                             |    |
| 50 | analyses        |                                                             |    |
| 51 |                 |                                                             |    |
| 52 |                 |                                                             |    |
| 53 |                 |                                                             |    |
| 54 |                 |                                                             |    |
| 55 |                 |                                                             |    |
| 56 |                 |                                                             |    |
| 57 |                 |                                                             |    |
| 58 |                 |                                                             |    |
| 59 |                 |                                                             |    |
| 60 |                 |                                                             |    |

|    |                      |                      |                                            |                                |
|----|----------------------|----------------------|--------------------------------------------|--------------------------------|
| 1  | Statistics: analysis | <a href="#">#20c</a> | Definition of analysis population relating | 15                             |
| 2  |                      |                      |                                            |                                |
| 3  | population and       |                      | to protocol non-adherence (eg, as          |                                |
| 4  |                      |                      |                                            |                                |
| 5  | missing data         |                      | randomised analysis), and any              |                                |
| 6  |                      |                      |                                            |                                |
| 7  |                      |                      | statistical methods to handle missing      |                                |
| 8  |                      |                      |                                            |                                |
| 9  |                      |                      | data (eg, multiple imputation)             |                                |
| 10 |                      |                      |                                            |                                |
| 11 |                      |                      |                                            |                                |
| 12 |                      |                      |                                            |                                |
| 13 | Data monitoring:     | <a href="#">#21a</a> | Composition of data monitoring             | 18                             |
| 14 |                      |                      |                                            |                                |
| 15 | formal committee     |                      | committee (DMC); summary of its role       |                                |
| 16 |                      |                      |                                            |                                |
| 17 |                      |                      | and reporting structure; statement of      |                                |
| 18 |                      |                      |                                            |                                |
| 19 |                      |                      | whether it is independent from the         |                                |
| 20 |                      |                      |                                            |                                |
| 21 |                      |                      | sponsor and competing interests; and       |                                |
| 22 |                      |                      |                                            |                                |
| 23 |                      |                      | reference to where further details about   |                                |
| 24 |                      |                      |                                            |                                |
| 25 |                      |                      | its charter can be found, if not in the    |                                |
| 26 |                      |                      |                                            |                                |
| 27 |                      |                      | protocol. Alternatively, an explanation of |                                |
| 28 |                      |                      |                                            |                                |
| 29 |                      |                      | why a DMC is not needed                    |                                |
| 30 |                      |                      |                                            |                                |
| 31 |                      |                      |                                            |                                |
| 32 |                      |                      |                                            |                                |
| 33 |                      |                      |                                            |                                |
| 34 | Data monitoring:     | <a href="#">#21b</a> | Description of any interim analyses and    | n/a.                           |
| 35 |                      |                      |                                            |                                |
| 36 | interim analysis     |                      | stopping guidelines, including who will    |                                |
| 37 |                      |                      |                                            |                                |
| 38 |                      |                      | have access to these interim results and   | This is a childhood obesity    |
| 39 |                      |                      |                                            | prevention intervention.       |
| 40 |                      |                      | make the final decision to terminate the   |                                |
| 41 |                      |                      |                                            | Based on our previous          |
| 42 |                      |                      | trial                                      |                                |
| 43 |                      |                      |                                            | experiences, it is less likely |
| 44 |                      |                      |                                            | that discontinuing             |
| 45 |                      |                      |                                            | interventions will take place. |
| 46 |                      |                      |                                            |                                |
| 47 |                      |                      |                                            |                                |
| 48 |                      |                      |                                            |                                |
| 49 |                      |                      |                                            |                                |
| 50 |                      |                      |                                            |                                |
| 51 |                      |                      |                                            |                                |
| 52 | Harms                | <a href="#">#22</a>  | Plans for collecting, assessing,           | 16 (we will use                |
| 53 |                      |                      |                                            |                                |
| 54 |                      |                      | reporting, and managing solicited and      | questionnaires to collect and  |
| 55 |                      |                      |                                            |                                |
| 56 |                      |                      | spontaneously reported adverse events      |                                |
| 57 |                      |                      |                                            |                                |
| 58 |                      |                      |                                            |                                |
| 59 |                      |                      |                                            |                                |
| 60 |                      |                      |                                            |                                |

|    |                   |                      |                                             |                                 |
|----|-------------------|----------------------|---------------------------------------------|---------------------------------|
| 1  |                   |                      | and other unintended effects of trial       | assess any adverse events       |
| 2  |                   |                      |                                             |                                 |
| 3  |                   |                      | interventions or trial conduct              | or other process data)          |
| 4  |                   |                      |                                             |                                 |
| 5  |                   |                      |                                             |                                 |
| 6  | Auditing          | <a href="#">#23</a>  | Frequency and procedures for auditing       | 7 (This study is one of the     |
| 7  |                   |                      | trial conduct, if any, and whether the      | five independent studies of     |
| 8  |                   |                      | process will be independent from            | the overall DECIDE project.     |
| 9  |                   |                      |                                             |                                 |
| 10 |                   |                      | investigators and the sponsor               | This overall project is audited |
| 11 |                   |                      |                                             | by the funder (National Key     |
| 12 |                   |                      |                                             | R&D Program of China).          |
| 13 |                   |                      |                                             |                                 |
| 14 |                   |                      |                                             |                                 |
| 15 |                   |                      |                                             |                                 |
| 16 |                   |                      |                                             |                                 |
| 17 |                   |                      |                                             |                                 |
| 18 |                   |                      |                                             |                                 |
| 19 |                   |                      |                                             |                                 |
| 20 | Research ethics   | <a href="#">#24</a>  | Plans for seeking research ethics           | 2-3                             |
| 21 |                   |                      |                                             |                                 |
| 22 | approval          |                      | committee / institutional review board      |                                 |
| 23 |                   |                      |                                             |                                 |
| 24 |                   |                      | (REC / IRB) approval                        |                                 |
| 25 |                   |                      |                                             |                                 |
| 26 |                   |                      |                                             |                                 |
| 27 |                   |                      |                                             |                                 |
| 28 | Protocol          | <a href="#">#25</a>  | Plans for communicating important           | 2-3                             |
| 29 |                   |                      |                                             |                                 |
| 30 | amendments        |                      | protocol modifications (eg, changes to      |                                 |
| 31 |                   |                      | eligibility criteria, outcomes, analyses)   |                                 |
| 32 |                   |                      | to relevant parties (eg, investigators,     |                                 |
| 33 |                   |                      | REC / IRBs, trial participants, trial       |                                 |
| 34 |                   |                      | registries, journals, regulators)           |                                 |
| 35 |                   |                      |                                             |                                 |
| 36 |                   |                      |                                             |                                 |
| 37 |                   |                      |                                             |                                 |
| 38 |                   |                      |                                             |                                 |
| 39 |                   |                      |                                             |                                 |
| 40 |                   |                      |                                             |                                 |
| 41 |                   |                      |                                             |                                 |
| 42 | Consent or assent | <a href="#">#26a</a> | Who will obtain informed consent or         | 10                              |
| 43 |                   |                      |                                             |                                 |
| 44 |                   |                      | assent from potential trial participants or |                                 |
| 45 |                   |                      | authorised surrogates, and how (see         |                                 |
| 46 |                   |                      | Item 32)                                    |                                 |
| 47 |                   |                      |                                             |                                 |
| 48 |                   |                      |                                             |                                 |
| 49 |                   |                      |                                             |                                 |
| 50 |                   |                      |                                             |                                 |
| 51 |                   |                      |                                             |                                 |
| 52 | Consent or        | <a href="#">#26b</a> | Additional consent provisions for           | n/a.                            |
| 53 |                   |                      |                                             |                                 |
| 54 | assent: ancillary |                      | collection and use of participant data      |                                 |
| 55 |                   |                      |                                             | This study will not collect     |
| 56 |                   |                      |                                             | biological specimens.           |
| 57 | studies           |                      |                                             |                                 |
| 58 |                   |                      |                                             |                                 |
| 59 |                   |                      |                                             |                                 |
| 60 |                   |                      |                                             |                                 |

|    |                       |                                                                 |                               |
|----|-----------------------|-----------------------------------------------------------------|-------------------------------|
| 1  |                       | and biological specimens in ancillary                           |                               |
| 2  |                       | studies, if applicable                                          |                               |
| 3  |                       |                                                                 |                               |
| 4  |                       |                                                                 |                               |
| 5  |                       |                                                                 |                               |
| 6  | Confidentiality       | <a href="#">#27</a> How personal information about              | 3                             |
| 7  |                       |                                                                 |                               |
| 8  |                       | potential and enrolled participants will                        |                               |
| 9  |                       |                                                                 |                               |
| 10 |                       | be collected, shared, and maintained in                         |                               |
| 11 |                       |                                                                 |                               |
| 12 |                       | order to protect confidentiality before,                        |                               |
| 13 |                       |                                                                 |                               |
| 14 |                       | during, and after the trial                                     |                               |
| 15 |                       |                                                                 |                               |
| 16 |                       |                                                                 |                               |
| 17 |                       |                                                                 |                               |
| 18 | Declaration of        | <a href="#">#28</a> Financial and other competing interests     | 26                            |
| 19 |                       |                                                                 |                               |
| 20 | interests             | for principal investigators for the overall                     |                               |
| 21 |                       |                                                                 |                               |
| 22 |                       | trial and each study site                                       |                               |
| 23 |                       |                                                                 |                               |
| 24 |                       |                                                                 |                               |
| 25 | Data access           | <a href="#">#29</a> Statement of who will have access to        | 3                             |
| 26 |                       |                                                                 |                               |
| 27 |                       | the final trial dataset, and disclosure of                      |                               |
| 28 |                       |                                                                 |                               |
| 29 |                       | contractual agreements that limit such                          |                               |
| 30 |                       |                                                                 |                               |
| 31 |                       | access for investigators                                        |                               |
| 32 |                       |                                                                 |                               |
| 33 |                       |                                                                 |                               |
| 34 |                       |                                                                 |                               |
| 35 | Ancillary and post    | <a href="#">#30</a> Provisions, if any, for ancillary and post- | n/a.                          |
| 36 |                       |                                                                 |                               |
| 37 | trial care            | trial care, and for compensation to those                       |                               |
| 38 |                       |                                                                 |                               |
| 39 |                       | who suffer harm from trial participation                        | This is a childhood obesity   |
| 40 |                       |                                                                 | prevention intervention.      |
| 41 |                       |                                                                 |                               |
| 42 |                       |                                                                 |                               |
| 43 |                       |                                                                 |                               |
| 44 |                       |                                                                 | Based on our experiences, it  |
| 45 |                       |                                                                 |                               |
| 46 |                       |                                                                 | is less likely that ancillary |
| 47 |                       |                                                                 |                               |
| 48 |                       |                                                                 | and post-trial care will take |
| 49 |                       |                                                                 |                               |
| 50 |                       |                                                                 | place.                        |
| 51 |                       |                                                                 |                               |
| 52 |                       |                                                                 |                               |
| 53 | Dissemination         | <a href="#">#31a</a> Plans for investigators and sponsor to     | 3                             |
| 54 |                       |                                                                 |                               |
| 55 | policy: trial results | communicate trial results to participants,                      |                               |
| 56 |                       |                                                                 |                               |
| 57 |                       | healthcare professionals, the public,                           |                               |
| 58 |                       |                                                                 |                               |
| 59 |                       |                                                                 |                               |
| 60 |                       |                                                                 |                               |

and other relevant groups (eg, via  
 publication, reporting in results  
 databases, or other data sharing  
 arrangements), including any  
 publication restrictions

Dissemination [#31b](#) Authorship eligibility guidelines and any n/a  
 policy: authorship intended use of professional writers

Dissemination [#31c](#) Plans, if any, for granting public access n/a  
 policy: to the full protocol, participant-level  
 reproducible dataset, and statistical code  
 research

Informed consent [#32](#) Model consent form and other related 10  
 materials documentation given to participants and  
 authorised surrogates

Biological [#33](#) Plans for collection, laboratory n/a  
 specimens evaluation, and storage of biological  
 specimens for genetic or molecular This study will not collect  
 analysis in the current trial and for future biological specimens.  
 use in ancillary studies, if applicable

The SPIRIT checklist is distributed under the terms of the Creative Commons Attribution License CC-  
 BY-ND 3.0. This checklist can be completed online using <https://www.goodreports.org/>, a tool made  
 by the [EQUATOR Network](#) in collaboration with [Penelope.ai](#)
